# Supplementary material for: The Effect of Three Complexes of Iodine with Amino Acids on Gene Expression of Model Antibiotic Resistant Microorganisms Escherichia coli ATCC BAA-196 and Staphylococcus aureus ATCC BAA-39
Source: MDPI journal article supplement (doi:10.3390/microorganisms11071705), 2023-06-29
Supplement: s1 [file s1]

Table S3. Regulation of expression of genes involved in the central metabolism of bacteria by the three tested complexes.

| Locus tag in <i>E. coli</i><br>BAA-196          | Locus tag in<br><i>S. aureus</i> BAA-39 | Gene         | <i>E. coli</i> BAA-196 |     |       |     |       |     | <i>S. aureus</i> BAA-39 |     |       |     |       |     | Annotation |    |                                                                             |
|-------------------------------------------------|-----------------------------------------|--------------|------------------------|-----|-------|-----|-------|-----|-------------------------|-----|-------|-----|-------|-----|------------|----|-----------------------------------------------------------------------------|
|                                                 |                                         |              | IPC25                  |     | IPC33 |     | IPC51 |     | IPC25                   |     | IPC33 |     | IPC51 |     |            |    |                                                                             |
|                                                 |                                         |              | Lag                    | Log | Lag   | Log | Lag   | Log | Lag                     | Log | Lag   | Log | Lag   | Log |            |    |                                                                             |
| <b>Glycolysis</b>                               |                                         |              |                        |     |       |     |       |     |                         |     |       |     |       |     |            |    |                                                                             |
| BAA196NC_4208                                   | HMPRNC0000_0863                         | <i>tpiA</i>  |                        |     |       |     |       |     | 1                       | 1   |       |     |       |     |            |    | Triosephosphate isomerase                                                   |
| NA                                              | HMPRNC0000_0860                         | <i>gapA1</i> |                        |     |       |     |       |     | 1                       |     |       |     |       |     |            |    | NAD-dependent glyceraldehyde-3-phosphate dehydrogenase                      |
| <b>Glycolysis &amp; Gluconeogenesis</b>         |                                         |              |                        |     |       |     |       |     |                         |     |       |     |       |     |            |    |                                                                             |
| BAA196NC_0782                                   | HMPRNC0000_0861                         | <i>pgk</i>   |                        |     |       |     |       |     | 1                       | 1   |       | 1   |       |     |            |    | Phosphoglycerate kinase                                                     |
| BAA196NC_3009                                   | HMPRNC0000_2679                         | <i>gpmA</i>  |                        |     |       |     |       | 1   |                         |     |       |     |       |     |            | -1 | Phosphoglyceromutase                                                        |
| <b>Gluconeogenesis</b>                          |                                         |              |                        |     |       |     |       |     |                         |     |       |     |       |     |            |    |                                                                             |
| BAA196NC_0089                                   | HMPRNC0000_0594                         | <i>kbl</i>   |                        |     |       |     |       |     |                         |     |       |     |       |     |            | -1 | 2-amino-3-ketobutyrate coenzyme A ligase                                    |
| BAA196NC_1920                                   | HMPRNC0000_1815                         | <i>gapA</i>  |                        |     |       |     |       |     |                         |     |       |     |       |     |            | -1 | Glyceraldehyde-3-phosphate dehydrogenase                                    |
| BAA196NC_0316                                   | HMPRNC0000_1928                         | <i>pkc</i>   |                        |     |       |     |       |     |                         |     |       |     |       |     |            | -1 | Phosphoenolpyruvate carboxykinase                                           |
| BAA196NC_0477                                   | HMPRNC0000_2889                         | <i>mdh</i>   |                        |     |       |     |       |     | 1                       |     |       |     |       |     |            | 1  | Malate dehydrogenase                                                        |
| BAA196NC_1977                                   | HMPRNC0000_2415                         | <i>pfkB</i>  |                        |     |       |     |       |     |                         |     |       |     |       |     |            | -1 | 6-phosphofructokinase II                                                    |
| BAA196NC_1238                                   | NA                                      | <i>maeB</i>  | 1                      | 1   |       |     |       |     |                         |     |       |     |       |     |            | 1  | Malic enzyme                                                                |
| NA                                              | HMPRNC0000_1834                         | <i>maeB</i>  |                        |     |       |     |       |     |                         |     |       |     |       |     |            | -1 | NADP-dependent malic enzyme                                                 |
| NA                                              | HMPRNC0000_0771                         | <i>pfkB2</i> |                        |     |       |     |       |     |                         |     |       |     |       |     |            | 1  | 1-phosphofructokinase                                                       |
| <b>Entner-Doudoroff (ED) pathway</b>            |                                         |              |                        |     |       |     |       |     |                         |     |       |     |       |     |            |    |                                                                             |
| BAA196NC_1997                                   | NA                                      | <i>pps</i>   |                        |     | 1     | 1   | 1     |     |                         |     |       |     |       |     |            |    | Phosphoenolpyruvate synthase                                                |
| <b>Pentose Phosphate Pathway (PPP)</b>          |                                         |              |                        |     |       |     |       |     |                         |     |       |     |       |     |            |    |                                                                             |
| BAA196NC_1844                                   | HMPRNC0000_1624                         | <i>zwf</i>   |                        |     |       |     |       |     |                         |     |       |     |       |     |            | 1  | Glucose-6-phosphate 1-dehydrogenase                                         |
| BAA196NC_1237                                   | NA                                      | <i>talA</i>  | 1                      | 1   |       |     |       |     |                         |     |       |     |       |     |            |    | Transaldolase A                                                             |
| BAA196NC_0774                                   | NA                                      | <i>tktA</i>  | 1                      | 1   |       |     |       |     |                         |     |       |     |       |     |            |    | Transketolase 1, thiamin-binding                                            |
| BAA196NC_1236                                   | HMPRNC0000_1439                         | <i>tktB</i>  | 1                      | 1   |       |     |       |     |                         |     |       |     |       |     |            |    | Transketolase 2, thiamin-binding                                            |
| <b>Glycogen synthesis</b>                       |                                         |              |                        |     |       |     |       |     |                         |     |       |     |       |     |            |    |                                                                             |
| BAA196NC_0290                                   | NA                                      | <i>glgA</i>  |                        |     |       |     |       |     |                         |     |       |     |       |     |            | -1 | Glycogen synthase                                                           |
| BAA196NC_0664                                   | NA                                      | <i>glgS</i>  |                        |     |       |     |       |     |                         |     |       |     |       |     |            | -1 | Glycogen synthesis protein GlgS                                             |
| NA                                              | HMPRNC0000_2759                         | <i>pgm</i>   |                        |     |       |     |       |     |                         |     |       |     |       |     |            | -1 | Phosphoglucosamine mutase / Phosphomannomutase                              |
| BAA196NC_1017                                   | NA                                      | <i>csrA</i>  |                        |     |       |     |       |     |                         |     |       |     |       |     |            | -1 | Carbon storage regulator                                                    |
| <b>TCA</b>                                      |                                         |              |                        |     |       |     |       |     |                         |     |       |     |       |     |            |    |                                                                             |
| BAA196NC_2092                                   | HMPRNC0000_1996                         | <i>fumC</i>  |                        |     |       |     |       |     |                         |     |       |     |       |     |            | -1 | Fumarate hydratase                                                          |
| BAA196NC_2565                                   | HMPRNC0000_1825                         | <i>icd</i>   |                        |     |       |     |       |     | 1                       |     |       |     |       |     |            | -1 | Isocitrate dehydrogenase                                                    |
| BAA196NC_3030                                   | HMPRNC0000_1313                         | <i>sucD</i>  |                        |     |       |     |       |     | 1                       |     |       |     |       |     |            | -1 | Succinyl-CoA synthetase subunit alpha                                       |
| BAA196NC_3031                                   | HMPRNC0000_1312                         | <i>sucC</i>  |                        |     |       |     |       |     | 1                       | -1  |       |     |       |     |            | -1 | Succinyl-CoA synthetase subunit beta                                        |
| BAA196NC_3032                                   | HMPRNC0000_1519                         | <i>sucB</i>  |                        |     |       |     |       |     | 1                       | -1  |       |     |       |     |            | -1 | Dihydroliipoamide acetyltransferase                                         |
| BAA196NC_3033                                   | HMPRNC0000_1520                         | <i>sucA</i>  |                        |     |       |     |       |     | 1                       |     |       |     |       |     |            | -1 | Alpha-ketoglutarate decarboxylase                                           |
| NA                                              | HMPRNC0000_0644                         | <i>merA2</i> |                        |     |       |     |       |     |                         |     |       |     |       |     |            | 1  | Putative Dihydroliipoamide dehydrogenase/Mercuric ion reductase             |
| <b>TCA &amp; glyoxylate bypass</b>              |                                         |              |                        |     |       |     |       |     |                         |     |       |     |       |     |            |    |                                                                             |
| BAA196NC_0477                                   | HMPRNC0000_2889                         | <i>mdh</i>   | 1                      | 1   |       |     |       |     |                         |     |       |     |       |     |            | 1  | Malate dehydrogenase                                                        |
| BAA196NC_2425                                   | HMPRNC0000_1449                         | <i>acnA</i>  |                        |     |       |     |       |     |                         |     |       |     |       |     |            | -1 | Aconitate hydratase                                                         |
| BAA196NC_3038                                   | NA                                      | <i>glfA</i>  |                        |     |       |     |       |     |                         |     |       |     |       |     |            | 1  | Citrate synthase                                                            |
| BAA196NC_3620                                   | NA                                      | <i>acnB</i>  |                        |     |       |     |       |     |                         |     |       |     |       |     |            | 1  | Aconitate hydratase                                                         |
| <b>Glyoxylate bypass</b>                        |                                         |              |                        |     |       |     |       |     |                         |     |       |     |       |     |            |    |                                                                             |
| BAA196NC_4123                                   | NA                                      | <i>aceA</i>  |                        |     |       |     |       |     |                         |     |       |     |       |     |            | 1  | Isocitrate lyase                                                            |
| BAA196NC_4124                                   | NA                                      | <i>aceB</i>  |                        |     |       |     |       |     |                         |     |       |     |       |     |            | 1  | Malate synthase                                                             |
| <b>Aerobic respiration</b>                      |                                         |              |                        |     |       |     |       |     |                         |     |       |     |       |     |            |    |                                                                             |
| BAA196NC_3034                                   | HMPRNC0000_1198                         | <i>sdhB</i>  |                        |     |       |     |       |     | 1                       |     |       |     |       |     |            | -1 | Succinate dehydrogenase, FeS subunit                                        |
| BAA196NC_3035                                   | HMPRNC0000_1197                         | <i>sdhA</i>  |                        |     |       |     |       |     | 1                       | 1   |       |     |       |     |            | -1 | Succinate dehydrogenase flavoprotein subunit                                |
| BAA196NC_3036                                   | NA                                      | <i>sdhD</i>  |                        |     |       |     |       |     |                         |     |       |     |       |     |            | -1 | Succinate dehydrogenase cytochrome b556 small membrane subunit              |
| BAA196NC_3037                                   | HMPRNC0000_1195                         | <i>sdhC</i>  |                        |     |       |     |       |     |                         |     |       |     |       |     |            | -1 | Succinate dehydrogenase cytochrome b556 large membrane subunit              |
| BAA196NC_3323                                   | NA                                      | <i>cyoA</i>  |                        |     |       |     |       |     |                         |     |       |     |       |     |            | -1 | Cytochrome o ubiquinol oxidase subunit II                                   |
| BAA196NC_3324                                   | HMPRNC0000_1094                         | <i>cyoB</i>  | 1                      | 1   |       |     |       |     |                         |     |       |     |       |     |            | -1 | Cytochrome o ubiquinol oxidase subunit I                                    |
| BAA196NC_3325                                   | NA                                      | <i>cyoC</i>  |                        |     |       |     |       |     |                         |     |       |     |       |     |            | -1 | Cytochrome o ubiquinol oxidase subunit III                                  |
| BAA196NC_3326                                   | NA                                      | <i>cyoD</i>  |                        |     |       |     |       |     |                         |     |       |     |       |     |            | -1 | Cytochrome o ubiquinol oxidase subunit IV                                   |
| BAA196NC_3327                                   | HMPRNC0000_1158                         | <i>cyoE</i>  | 1                      | 1   |       |     |       |     |                         |     |       |     |       |     |            | 1  | Protoheme IX farnesyltransferase                                            |
| BAA196NC_3025                                   | HMPRNC0000_1124                         | <i>cydA</i>  |                        |     |       |     |       |     |                         |     |       |     |       |     |            | 1  | Cytochrome d terminal oxidase, subunit I                                    |
| BAA196NC_3024                                   | NA                                      | <i>cydB</i>  |                        |     |       |     |       |     |                         |     |       |     |       |     |            | -1 | Cytochrome d terminal oxidase, subunit II                                   |
| NA                                              | HMPRNC0000_1095                         | <i>qoxA</i>  |                        |     |       |     |       |     |                         |     |       |     |       |     |            | -1 | Cytochrome aa3-600 menaquinol oxidase subunit II                            |
| NA                                              | HMPRNC0000_1093                         | <i>qoxD</i>  |                        |     |       |     |       |     |                         |     |       |     |       |     |            | -1 | Cytochrome aa3-600 menaquinol oxidase subunit IV                            |
| BAA196NC_1411                                   | NA                                      | <i>nuoC</i>  |                        |     |       |     |       |     |                         |     |       |     |       |     |            | -1 | NADH:ubiquinone oxidoreductase, chain C,D                                   |
| BAA196NC_1412                                   | NA                                      | <i>nuoE</i>  |                        |     |       |     |       |     |                         |     |       |     |       |     |            | -1 | NADH dehydrogenase subunit E                                                |
| BAA196NC_1414                                   | NA                                      | <i>nuoG</i>  |                        |     |       |     |       |     |                         |     |       |     |       |     |            | -1 | NADH dehydrogenase subunit G                                                |
| BAA196NC_2594                                   | HMPRNC0000_0966                         | <i>ndh</i>   |                        |     |       |     |       |     |                         |     |       |     |       |     |            | 1  | Respiratory NADH dehydrogenase 2/cupric reductase                           |
| <b>Anaerobic respiration &amp; fermentation</b> |                                         |              |                        |     |       |     |       |     |                         |     |       |     |       |     |            |    |                                                                             |
| BAA196NC_2425                                   | HMPRNC0000_1449                         | <i>acnA</i>  | 1                      | 1   |       |     |       |     |                         |     |       |     |       |     |            | -1 | Aconitate hydratase                                                         |
| BAA196NC_3620                                   | NA                                      | <i>acnB</i>  | 1                      | 1   |       |     |       |     |                         |     |       |     |       |     |            | -1 | Aconitate hydratase                                                         |
| BAA196NC_2473                                   | HMPRNC0000_2652                         | <i>narH</i>  |                        |     |       |     |       |     |                         |     |       |     |       |     |            | -1 | Nitrate reductase 1, beta (Fe-S) subunit                                    |
| BAA196NC_2474                                   | HMPRNC0000_2655                         | <i>narG</i>  | 1                      | 1   |       |     |       |     | 1                       | 1   |       |     |       |     |            | -1 | Nitrate reductase 1, alpha subunit                                          |
| BAA196NC_2475                                   | HMPRNC0000_2644                         | <i>narK</i>  |                        |     |       |     |       |     |                         |     |       |     |       |     |            | 1  | Nitrate/nitrite transporter                                                 |
| BAA196NC_2478                                   | HMPRNC0000_2068                         | <i>narL</i>  |                        |     |       |     |       |     |                         |     |       |     |       |     |            | 1  | DNA-binding response regulator in two-component regulatory system with NarX |
| BAA196NC_2233                                   | NA                                      | <i>narZ</i>  |                        |     |       |     |       |     |                         |     |       |     |       |     |            | -1 | Nitrate reductase 2 (NRZ), alpha subunit                                    |
| BAA196NC_2234                                   | NA                                      | <i>narY</i>  |                        |     |       |     |       |     |                         |     |       |     |       |     |            | -1 | Nitrate reductase 2 (NRZ), beta subunit                                     |
| BAA196NC_2477                                   | NA                                      | <i>narX</i>  |                        |     |       |     |       |     |                         |     |       |     |       |     |            | 1  | Sensory histidine kinase in two-component regulatory system with NarL       |
| BAA196NC_0353                                   | HMPRNC0000_2659                         | <i>nirB</i>  |                        |     |       |     |       |     |                         |     |       |     |       |     |            | -1 | Nitrite reductase, large subunit, NAD(P)H-binding                           |
| BAA196NC_1495                                   | NA                                      | <i>napA</i>  |                        |     |       |     |       |     |                         |     |       |     |       |     |            | -1 | Nitrate reductase, periplasmic, large subunit                               |

|                                                                          |                 |                   |    |    |    |  |  |  |                                                                                                                      |
|--------------------------------------------------------------------------|-----------------|-------------------|----|----|----|--|--|--|----------------------------------------------------------------------------------------------------------------------|
| BAA196NC_1496                                                            | NA              | <i>napG</i>       |    |    |    |  |  |  | Quinol dehydrogenase periplasmic component                                                                           |
| BAA196NC_1499                                                            | NA              | <i>napC</i>       |    |    |    |  |  |  | Nitrate reductase, cytochrome c-type, periplasmic                                                                    |
| BAA196NC_2027                                                            | NA              | <i>fumD</i>       | -1 | -1 |    |  |  |  | Fumarate D                                                                                                           |
| BAA196NC_3977                                                            | HMPRNC0000_1197 | <i>frdA</i>       |    |    |    |  |  |  | Fumarate reductase                                                                                                   |
| BAA196NC_3978                                                            | HMPRNC0000_1198 | <i>frdB</i>       |    |    |    |  |  |  | Fumarate reductase (anaerobic), Fe-S subunit                                                                         |
| BAA196NC_4234                                                            | NA              | <i>fdoG</i>       | 1  | 1  | 1  |  |  |  | Formate dehydrogenase-O, large subunit                                                                               |
| BAA196NC_4235                                                            | NA              | <i>fdoH</i>       |    |    |    |  |  |  | Formate dehydrogenase-O, Fe-S subunit                                                                                |
| BAA196NC_4236                                                            | NA              | <i>fdol</i>       | 1  | 1  |    |  |  |  | Formate dehydrogenase-O, cytochrome b556 subunit                                                                     |
| BAA196NC_4237                                                            | NA              | <i>fdhE</i>       |    |    |    |  |  |  | Formate dehydrogenase accessory protein FdhE                                                                         |
| BAA196NC_0120                                                            | HMPRNC0000_0169 | <i>aldB</i>       |    |    |    |  |  |  | Aldehyde dehydrogenase B                                                                                             |
|                                                                          | NA              | <i>gapA1</i>      |    |    |    |  |  |  | NAD-dependent glyceraldehyde-3-phosphate dehydrogenase                                                               |
| BAA196NC_0094                                                            | HMPRNC0000_0864 | <i>gpmI</i>       |    |    |    |  |  |  | Phosphoglyceromutase                                                                                                 |
| BAA196NC_3009                                                            | HMPRNC0000_2679 | <i>gpmA</i>       |    |    |    |  |  |  | Phosphoglyceromutase                                                                                                 |
| <b>Acetate &amp; pyruvate metabolism</b>                                 |                 |                   |    |    |    |  |  |  |                                                                                                                      |
| BAA196NC_1400                                                            | HMPRNC0000_1846 | <i>ackA</i>       |    |    |    |  |  |  | Acetate kinase                                                                                                       |
| BAA196NC_1399                                                            | NA              | <i>pta</i>        |    |    |    |  |  |  | Phosphate acetyltransferase                                                                                          |
| BAA196NC_0596                                                            | NA              | <i>tdcD</i>       |    |    |    |  |  |  | Propionate kinase/acetate kinase C, anaerobic                                                                        |
| BAA196NC_0597                                                            | NA              | <i>tdcE</i>       |    |    |    |  |  |  | Pyruvate formate-lyase 4/2-ketobutyrate formate-lyase                                                                |
| BAA196NC_2797                                                            | HMPRNC0000_0241 | <i>pfkB</i>       |    |    |    |  |  |  | Pyruvate formate lyase I                                                                                             |
|                                                                          | NA              | HMPRNC0000_0178   |    |    |    |  |  |  | Acyl-CoA dehydrogenase, short-chain specific                                                                         |
| BAA196NC_4065                                                            | HMPRNC0000_1877 | <i>acs</i>        | 1  | 1  |    |  |  |  | Acetyl-CoA synthetase                                                                                                |
|                                                                          | NA              | HMPRNC0000_1876   |    |    |    |  |  |  | Acetyl-CoA synthetase                                                                                                |
| <b>Peptidoglycan metabolism associated with cell growth and division</b> |                 |                   |    |    |    |  |  |  |                                                                                                                      |
| BAA196NC_3652                                                            | HMPRNC0000_1230 | <i>ftsI</i>       |    |    |    |  |  |  | Transpeptidase involved in septal peptidoglycan synthesis (penicillin-binding protein 3)                             |
| BAA196NC_3647                                                            | HMPRNC0000_1154 | <i>ftsW</i>       | -1 | -1 | -1 |  |  |  | Integral membrane protein involved in stabilizing FtsZ ring during cell division                                     |
| BAA196NC_1917                                                            | NA              | <i>mipA</i>       |    |    |    |  |  |  | scaffolding protein for murein synthesizing machinery                                                                |
| BAA196NC_0969                                                            | NA              | <i>nlpD</i>       |    |    |    |  |  |  | Predicted outer membrane lipoprotein                                                                                 |
| BAA196NC_2519                                                            | NA              | <i>dadA</i>       |    |    |    |  |  |  | D-amino acid dehydrogenase small subunit                                                                             |
| BAA196NC_2518                                                            | NA              | <i>dadX</i>       |    |    |    |  |  |  | alanine racemase                                                                                                     |
| BAA196NC_2883                                                            | NA              | <i>ybiS</i>       |    |    |    |  |  |  | L,D-transpeptidase ldtB                                                                                              |
| BAA196NC_3530                                                            | NA              | <i>mltD</i>       |    |    |    |  |  |  | Predicted membrane-bound lytic murein transglycosylase D                                                             |
| BAA196NC_2025                                                            | NA              | <i>lpp</i>        |    |    |    |  |  |  | Murein lipoprotein                                                                                                   |
| BAA196NC_1524                                                            | NA              | <i>spr (mepS)</i> |    |    |    |  |  |  | Predicted peptidase, outer membrane lipoprotein                                                                      |
| BAA196NC_3117                                                            | NA              | <i>dacA</i>       |    |    |    |  |  |  | D-alanyl-D-alanine carboxypeptidase (penicillin-binding protein 5)                                                   |
| BAA196NC_4381                                                            | HMPRNC0000_0521 | <i>glmU</i>       |    |    |    |  |  |  | Bifunctional N-acetylglucosamine-1-phosphate uridyltransferase/glucosamine-1-phosphate acetyltransferase             |
| <b>KEGG predicted Peptidoglycan synthesis</b>                            |                 |                   |    |    |    |  |  |  |                                                                                                                      |
| BAA196NC_0523                                                            | HMPRNC0000_2292 | <i>murA1</i>      |    |    |    |  |  |  | UDP-N-acetylglucosamine 1-carboxyvinyltransferase                                                                    |
|                                                                          | NA              | HMPRNC0000_2320   |    |    |    |  |  |  | UDP-N-acetylglucosamine 1-carboxyvinyltransferase                                                                    |
| BAA196NC_4159                                                            | HMPRNC0000_0815 | <i>murB</i>       |    |    |    |  |  |  | UDP-N-acetylenolpyruvoylglucosamine reductase                                                                        |
| BAA196NC_3645                                                            | HMPRNC0000_1885 | <i>murC</i>       |    |    |    |  |  |  | UDP-N-acetylmuramate--L-alanine ligase                                                                               |
| BAA196NC_3648                                                            | HMPRNC0000_1232 | <i>murD</i>       |    |    |    |  |  |  | UDP-N-acetylmuramoylalanine--D-glutamate ligase                                                                      |
|                                                                          | NA              | HMPRNC0000_2076   |    |    |    |  |  |  | putative amino acid ligase found clustered with an amidotransferase                                                  |
| BAA196NC_3650                                                            | HMPRNC0000_2269 | <i>murF</i>       |    |    |    |  |  |  | UDP-N-acetylmuramoyl-tripeptide--D-alanyl-D-alanine ligase                                                           |
| BAA196NC_3649                                                            | HMPRNC0000_1231 | <i>mraY</i>       |    |    |    |  |  |  | Phospho-N-acetylmuramoyl-pentapeptide- transferase                                                                   |
|                                                                          | NA              | HMPRNC0000_1526   |    |    |    |  |  |  | UDP-N-acetylglucosamine--N-acetylmuramyl- (pentapeptide) pyrophosphoryl-undecaprenol N-acetylglucosamine transferase |
|                                                                          | NA              | HMPRNC0000_2479   |    |    |    |  |  |  | Lipid II:glycine glycytransferase                                                                                    |
|                                                                          | NA              | HMPRNC0000_1475   |    |    |    |  |  |  | tRNA-dependent lipid II-Gly glycytransferase and FemA                                                                |
|                                                                          | NA              | HMPRNC0000_1476   |    |    |    |  |  |  | tRNA-dependent lipid II-GlyGly glycytransferase                                                                      |
|                                                                          | NA              | HMPRNC0000_1872   |    |    |    |  |  |  | Multimodular transpeptidase-transglycosylase                                                                         |
|                                                                          | NA              | HMPRNC0000_1560   |    |    |    |  |  |  | Multimodular transpeptidase-transglycosylase / Penicillin-binding protein 1A/1B (PBP1)                               |
| BAA196NC_4160                                                            | HMPRNC0000_1199 | <i>murI</i>       |    |    |    |  |  |  | Glutamate racemase                                                                                                   |
