# Supplementary material for: The Effect of Three Complexes of Iodine with Amino Acids on Gene Expression of Model Antibiotic Resistant Microorganisms Escherichia coli ATCC BAA-196 and Staphylococcus aureus ATCC BAA-39
Source: MDPI journal article supplement (doi:10.3390/microorganisms11071705), 2023-06-29
Supplement: s1 [file s1]

Table S2. Genes regulated with a statistical reliability ( $|fold\ change| \geq 2.0$ ;  $p\text{-value} \leq 0.05$ ) under the effect of iodine-containing complexes at least at one condition.

1 - upregulation; -1 - downregulation;

| Locus tag in <i>E. coli</i><br>BAA-196 | Locus tag in<br><i>S. aureus</i> BAA-39 | Gene        | <i>E. coli</i> BAA-196 |     |       |     |       |     | <i>S. aureus</i> BAA-39 |     |       |     |       |     | Annotation                                                                                     |
|----------------------------------------|-----------------------------------------|-------------|------------------------|-----|-------|-----|-------|-----|-------------------------|-----|-------|-----|-------|-----|------------------------------------------------------------------------------------------------|
|                                        |                                         |             | IPC25                  |     | IPC33 |     | IPC51 |     | IPC25                   |     | IPC33 |     | IPC51 |     |                                                                                                |
|                                        |                                         |             | Lag                    | Log | Lag   | Log | Lag   | Log | Lag                     | Log | Lag   | Log | Lag   | Log |                                                                                                |
| BAA196NC_0001                          | HMPRNC0000_0001                         | <i>dnaA</i> |                        |     |       |     |       |     | -1                      |     |       |     |       |     | Chromosomal replication initiation protein                                                     |
| BAA196NC_0054                          | HMPRNC0000_1766                         | <i>spoT</i> |                        |     | 1     |     | 1     |     |                         |     |       |     |       |     | Bifunctional (p)ppGpp synthetase II/ guanosine-3',5'-bis pyrophosphate 3'-pyrophosphohydrolase |
| BAA196NC_0056                          | HMPRNC0000_1263                         | <i>gmk</i>  |                        |     |       |     | 1     |     |                         |     |       |     |       |     | Guanylate kinase                                                                               |
| BAA196NC_0065                          | HMPRNC0000_1265                         | <i>dfp</i>  |                        |     |       |     |       | 1   |                         |     | 1     |     |       |     | Bifunctional phosphopantothencysteine decarboxylase/phosphopantothenate synthase               |
| BAA196NC_0066                          | HMPRNC0000_1785                         | <i>yciR</i> |                        |     |       |     | -1    |     |                         |     |       |     |       |     | DNA repair protein RadC                                                                        |
| BAA196NC_0089                          | HMPRNC0000_0594                         | <i>kbl</i>  |                        |     |       |     |       |     | -1                      |     |       |     |       |     | 2-amino-3-ketobutyrate coenzyme A ligase                                                       |
| BAA196NC_0094                          | HMPRNC0000_0864                         | <i>gpml</i> |                        |     |       |     |       |     | 1                       | 1   | 1     | 1   |       |     | Phosphoglyceromutase                                                                           |
| BAA196NC_0098                          | HMPRNC0000_1589                         | <i>gpsA</i> | -1                     |     |       |     | -1    | -1  |                         | 1   | 1     | 1   |       |     | NAD(P)H-dependent glycerol-3-phosphate dehydrogenase                                           |
| BAA196NC_0120                          | HMPRNC0000_0169                         | <i>aldB</i> |                        |     |       |     |       | -1  |                         | 1   | 1     | 1   |       |     | Aldehyde dehydrogenase B                                                                       |
| BAA196NC_0145                          | HMPRNC0000_2772                         | <i>xyiB</i> |                        |     |       |     |       |     |                         |     |       |     |       | -1  | Xylulokinase                                                                                   |
| BAA196NC_0158                          | HMPRNC0000_0955                         | <i>tiaE</i> |                        |     |       |     |       |     | -1                      |     |       |     |       |     | 2-ketoaldonate reductase/glyoxylate reductase B                                                |
| BAA196NC_0170                          | HMPRNC0000_1025                         | <i>dppD</i> |                        |     |       |     |       | -1  |                         |     |       |     |       |     | Dipeptide transporter                                                                          |
| BAA196NC_0249                          | HMPRNC0000_0035                         | <i>zntA</i> | 1                      |     | 1     |     |       |     | 1                       | 1   | 1     | 1   |       |     | Zinc, cobalt and lead efflux system                                                            |
| BAA196NC_0271                          | HMPRNC0000_0224                         | <i>ggt</i>  | 1                      |     |       |     | -1    |     | 1                       | 1   |       |     |       |     | Gamma-glutamyltranspeptidase periplasmic precursor                                             |
| BAA196NC_0316                          | HMPRNC0000_1928                         | <i>pck</i>  | 1                      |     |       |     | -1    |     | -1                      | -1  |       |     |       |     | Phosphoenolpyruvate carboxykinase                                                              |
| BAA196NC_0318                          | HMPRNC0000_0538                         | <i>hslO</i> |                        |     |       |     |       |     | 1                       | 1   | 1     | 1   |       |     | Hsp33-like chaperonin                                                                          |
| BAA196NC_0353                          | HMPRNC0000_2659                         | <i>nirB</i> |                        |     |       |     |       | 1   | -1                      | -1  |       |     |       |     | Nitrite reductase, large subunit, NAD(P)H-binding                                              |
| BAA196NC_0359                          | HMPRNC0000_0787                         | <i>pabA</i> |                        |     | 1     |     |       |     |                         |     |       |     |       |     | Para-aminobenzoate synthase component II                                                       |
| BAA196NC_0360                          | HMPRNC0000_0987                         | <i>argD</i> |                        |     |       |     |       |     | -1                      | -1  |       |     |       |     | Bifunctional acetylornithine aminotransferase/ succinyladiaminopimelate aminotransferase       |
| BAA196NC_0378                          | HMPRNC0000_0588                         | <i>rpsL</i> |                        |     |       |     |       |     | 1                       | 1   |       |     |       |     | 30S ribosomal protein S12                                                                      |
| BAA196NC_0379                          | HMPRNC0000_0589                         | <i>rpsG</i> |                        |     |       |     |       |     | 1                       | 1   |       |     |       |     | 30S ribosomal protein S7                                                                       |
| BAA196NC_0380                          | HMPRNC0000_0590                         | <i>fusA</i> | 1                      |     |       |     |       |     | 1                       | 1   |       |     |       |     | Elongation factor EF-2                                                                         |
| BAA196NC_0400                          | HMPRNC0000_2462                         | <i>rplC</i> | 1                      |     |       |     |       |     |                         |     |       |     |       |     | 50S ribosomal protein L3                                                                       |
| BAA196NC_0402                          | HMPRNC0000_2460                         | <i>rplW</i> |                        |     |       |     |       | -1  | 1                       | 1   | 1     | 1   |       |     | 50S ribosomal protein L23                                                                      |
| BAA196NC_0404                          | HMPRNC0000_2458                         | <i>rpsS</i> |                        |     |       |     |       | -1  |                         |     |       |     |       |     | 30S ribosomal protein S19                                                                      |
| BAA196NC_0405                          | HMPRNC0000_2457                         | <i>rplV</i> |                        |     |       |     |       |     |                         |     |       |     |       | -1  | 50S ribosomal protein L22                                                                      |
| BAA196NC_0407                          | HMPRNC0000_2455                         | <i>rplP</i> | 1                      |     |       |     |       |     | 1                       | 1   |       |     |       |     | 50S ribosomal protein L16                                                                      |
| BAA196NC_0408                          | HMPRNC0000_2454                         | <i>rpmC</i> |                        |     | 1     |     |       |     | 1                       | 1   | -1    | 1   |       |     | 50S ribosomal protein L29                                                                      |
| BAA196NC_0409                          | HMPRNC0000_2453                         | <i>rpsQ</i> |                        |     |       |     |       |     | 1                       | 1   |       |     |       |     | 30S ribosomal protein S17                                                                      |
| BAA196NC_0411                          | HMPRNC0000_2451                         | <i>rplX</i> |                        |     |       |     |       | -1  |                         |     |       |     |       |     | 50S ribosomal protein L24                                                                      |
| BAA196NC_0412                          | HMPRNC0000_2450                         | <i>rplE</i> |                        |     |       |     |       |     | 1                       | 1   |       |     |       |     | 50S ribosomal protein L5                                                                       |
| BAA196NC_0414                          | HMPRNC0000_2449                         | <i>rpsH</i> | 1                      |     |       |     |       |     | -1                      | -1  |       |     |       |     | 30S ribosomal protein S8                                                                       |
| BAA196NC_0415                          | HMPRNC0000_2448                         | <i>rplF</i> |                        |     |       |     |       | -1  | 1                       | 1   |       |     |       |     | 50S ribosomal protein L6                                                                       |
| BAA196NC_0416                          | HMPRNC0000_2447                         | <i>rplR</i> | 1                      |     |       |     |       |     | 1                       | 1   |       |     |       |     | 50S ribosomal protein L18                                                                      |
| BAA196NC_0418                          | HMPRNC0000_2445                         | <i>rpmD</i> | 1                      |     | 1     |     |       |     | 1                       | 1   | 1     | 1   |       |     | 50S ribosomal protein L30                                                                      |
| BAA196NC_0419                          | HMPRNC0000_2444                         | <i>rplO</i> | 1                      |     |       |     |       |     |                         |     |       |     |       |     | 50S ribosomal protein L15                                                                      |
| BAA196NC_0420                          | HMPRNC0000_2443                         | <i>secY</i> |                        |     |       |     |       |     | 1                       | 1   |       |     |       |     | Protein translocase subunit SecY                                                               |
| BAA196NC_0424                          | HMPRNC0000_1859                         | <i>rpsD</i> |                        |     |       |     |       |     | -1                      | -1  |       |     |       |     | 30S ribosomal protein S4                                                                       |
| BAA196NC_0425                          | HMPRNC0000_2437                         | <i>rpoA</i> |                        |     |       |     |       | -1  |                         |     |       |     |       | -1  | DNA-directed RNA polymerase subunit alpha                                                      |
| BAA196NC_0428                          | HMPRNC0000_0064                         | <i>zntR</i> |                        |     |       |     |       |     | 1                       |     |       |     |       |     | Zinc-responsive transcriptional regulator                                                      |
| BAA196NC_0430                          | HMPRNC0000_1447                         | <i>mscL</i> |                        |     |       |     |       | 1   |                         |     |       |     |       |     | Large-conductance mechanosensitive channel                                                     |
| BAA196NC_0432                          | HMPRNC0000_1274                         | <i>rsmB</i> |                        |     |       |     |       |     | 1                       | 1   |       |     |       |     | 16S rRNA m5C967 methyltransferase, S-adenosyl-L-methionine-dependent                           |
| BAA196NC_0458                          | HMPRNC0000_1651                         | <i>accC</i> |                        |     |       |     |       | -1  |                         |     |       |     |       |     | Acetyl-CoA carboxylase                                                                         |
| BAA196NC_0459                          | HMPRNC0000_1652                         | <i>accB</i> |                        |     |       |     | 1     |     |                         |     |       |     |       |     | Acetyl-CoA carboxylase                                                                         |
| BAA196NC_0461                          | HMPRNC0000_2623                         | <i>yhdH</i> | 1                      |     |       |     |       |     |                         |     |       |     |       |     | Predicted oxidoreductase, Zn-dependent and NAD(P)-binding                                      |
| BAA196NC_0477                          | HMPRNC0000_2889                         | <i>mdh</i>  | 1                      |     |       |     |       |     |                         |     |       |     | 1     |     | Malate dehydrogenase                                                                           |
| BAA196NC_0482                          | HMPRNC0000_2432                         | <i>rplM</i> |                        |     |       |     |       | -1  |                         |     |       |     |       |     | 50S ribosomal protein L13                                                                      |
| BAA196NC_0498                          | HMPRNC0000_0488                         | <i>gltD</i> | 1                      |     |       |     |       |     | 1                       | 1   | 1     | 1   |       |     | Glutamate synthase, 4Fe-4S protein, small subunit                                              |
| BAA196NC_0499                          | HMPRNC0000_0487                         | <i>gltB</i> | 1                      |     | 1     |     |       |     | 1                       | 1   | 1     | 1   |       |     | Glutamate synthase, large subunit                                                              |
| BAA196NC_0507                          | HMPRNC0000_0852                         | <i>yhbJ</i> | -1                     |     |       |     |       |     | 1                       | 1   | 1     | 1   |       |     | Hypothetical protein                                                                           |
| BAA196NC_0525                          | HMPRNC0000_1584                         | <i>ispB</i> |                        |     |       |     |       |     | -1                      |     |       |     |       | -1  | Octaprenyl diphosphate synthase                                                                |
| BAA196NC_0526                          | HMPRNC0000_1780                         | <i>rplU</i> |                        |     |       |     |       | 1   |                         |     |       |     |       |     | 50S ribosomal protein L21                                                                      |
| BAA196NC_0527                          | HMPRNC0000_1778                         | <i>rpmA</i> |                        |     |       |     |       |     |                         |     |       |     |       |     | 50S ribosomal protein L27                                                                      |
| BAA196NC_0533                          | HMPRNC0000_1728                         | <i>yhbY</i> |                        |     |       |     |       | -1  |                         |     |       |     |       |     | Predicted RNA-binding protein                                                                  |
| BAA196NC_0535                          | HMPRNC0000_0537                         | <i>ftsH</i> |                        |     |       |     |       |     | 1                       | 1   |       |     |       |     | Protease, ATP-dependent zinc-metallo                                                           |
| BAA196NC_0546                          | HMPRNC0000_1339                         | <i>rpsO</i> |                        |     |       |     |       | -1  |                         |     |       |     |       |     | 30S ribosomal protein S15                                                                      |
| BAA196NC_0548                          | HMPRNC0000_1340                         | <i>pnp</i>  |                        |     |       |     |       |     |                         |     |       |     |       | -1  | Polynucleotide phosphorylase/polyadenylase                                                     |
| BAA196NC_0552                          | HMPRNC0000_1755                         | <i>yhbW</i> |                        |     |       |     |       |     | 1                       | 1   | 1     | 1   |       |     | Luciferase-like monooxygenase                                                                  |
| BAA196NC_0594                          | HMPRNC0000_1548                         | <i>tdcB</i> | -1                     |     | -1    |     |       | -1  |                         |     |       |     |       |     | Threonine dehydratase                                                                          |
| BAA196NC_0606                          | HMPRNC0000_2583                         | <i>yhaH</i> |                        |     |       |     |       |     |                         |     |       |     |       | 1   | Predicted inner membrane protein                                                               |
| BAA196NC_0646                          | HMPRNC0000_2227                         | <i>ygjD</i> |                        |     |       |     |       |     | 1                       |     |       |     |       |     | O-sialoglycoprotein endopeptidase                                                              |
| BAA196NC_0706                          | HMPRNC0000_2568                         | <i>yghA</i> |                        |     |       |     |       | 1   |                         |     | -1    |     | -1    |     | Oxidoreductase                                                                                 |
| BAA196NC_0737                          | HMPRNC0000_2616                         | <i>lctP</i> |                        |     |       |     |       |     |                         |     |       |     |       | -1  | L-lactate permease                                                                             |
| BAA196NC_0749                          | HMPRNC0000_2047                         | <i>mutY</i> |                        |     |       |     |       | -1  |                         |     |       |     |       |     | Adenine DNA glycosylase                                                                        |
| BAA196NC_0764                          | HMPRNC0000_1706                         | <i>yggJ</i> |                        |     |       |     |       |     | 1                       | 1   |       | 1   |       |     | Hypothetical protein                                                                           |
| BAA196NC_0768                          | HMPRNC0000_1927                         | <i>metK</i> | 1                      |     |       |     |       | 1   |                         |     |       |     |       |     | S-adenosylmethionine synthetase                                                                |
| BAA196NC_0782                          | HMPRNC0000_0861                         | <i>pgk</i>  |                        |     |       |     |       |     | 1                       | 1   |       | 1   |       |     | Phosphoglycerate kinase                                                                        |
| BAA196NC_0785                          | HMPRNC0000_0893                         | <i>argO</i> |                        |     |       |     |       |     |                         |     |       | 1   |       |     | Arginine exporter protein                                                                      |

|               |                 |             |   |    |    |    |   |   |   |   |   |   |   |   |  |  |  |  |                                                                                                    |
|---------------|-----------------|-------------|---|----|----|----|---|---|---|---|---|---|---|---|--|--|--|--|----------------------------------------------------------------------------------------------------|
| BAA196NC_0804 | HMPRNC0000_1665 | <i>gcvT</i> |   |    |    |    |   |   |   |   |   |   |   |   |  |  |  |  | Glycine cleavage system aminomethyltransferase T                                                   |
| BAA196NC_0805 | HMPRNC0000_0904 | <i>gcvH</i> | 1 | 1  | 1  |    |   |   |   |   |   |   |   |   |  |  |  |  | Glycine cleavage system protein H                                                                  |
| BAA196NC_0810 | HMPRNC0000_2386 | <i>yqfA</i> |   |    | -1 |    |   |   |   |   |   |   |   |   |  |  |  |  | Predicted oxidoreductase, inner membrane subunit                                                   |
| BAA196NC_0818 | HMPRNC0000_0838 | <i>prfB</i> |   |    |    | 1  | 1 |   |   |   |   |   |   |   |  |  |  |  | Peptide chain release factor 2                                                                     |
| BAA196NC_0883 | HMPRNC0000_1536 | <i>thyA</i> |   |    |    | -1 |   |   |   |   |   |   |   |   |  |  |  |  | Thymidylate synthase                                                                               |
| BAA196NC_0921 | HMPRNC0000_2778 | <i>gudP</i> |   |    |    | -1 |   |   |   |   |   |   |   |   |  |  |  |  | Predicted D-glucarate transporter                                                                  |
| BAA196NC_0930 | HMPRNC0000_2324 | <i>pyrG</i> |   |    |    |    | 1 | 1 |   |   |   |   |   |   |  |  |  |  | CTP synthetase                                                                                     |
| BAA196NC_0946 | HMPRNC0000_2912 | <i>cysI</i> |   |    |    | 1  |   |   |   |   |   |   |   |   |  |  |  |  | Sulfite reductase, alpha subunit, flavoprotein                                                     |
| BAA196NC_0976 | HMPRNC0000_0769 | <i>ygbI</i> |   |    |    | 1  | 1 | 1 | 1 |   |   |   |   |   |  |  |  |  | Predicted DNA-binding transcriptional regulator                                                    |
| BAA196NC_1014 | HMPRNC0000_1351 | <i>recA</i> |   |    |    |    |   |   |   |   |   |   |   |   |  |  |  |  | Recombinase A                                                                                      |
| BAA196NC_1016 | HMPRNC0000_1749 | <i>alaS</i> |   | 1  |    |    |   |   |   |   |   |   |   |   |  |  |  |  | Alanyl-tRNA synthetase                                                                             |
| BAA196NC_1034 | HMPRNC0000_0809 | <i>nrdF</i> |   |    |    |    |   |   |   |   |   |   |   |   |  |  |  |  | Ribonucleotide-diphosphate reductase beta subunit                                                  |
| BAA196NC_1048 | HMPRNC0000_2892 | <i>gabT</i> |   |    |    | 1  | 1 |   |   |   |   |   |   |   |  |  |  |  | 4-aminobutyrate aminotransferase                                                                   |
| BAA196NC_1090 | HMPRNC0000_1711 | <i>grpE</i> |   |    |    | 1  | 1 | 1 | 1 | 1 |   |   |   |   |  |  |  |  | Heat shock protein                                                                                 |
| BAA196NC_1093 | HMPRNC0000_1301 | <i>ffh</i>  |   |    |    |    |   |   |   |   | 1 | 1 |   |   |  |  |  |  | Signal Recognition Particle (SRP) component with 4.5S RNA (ffs)                                    |
| BAA196NC_1096 | HMPRNC0000_1306 | <i>trmD</i> |   |    |    |    |   |   |   |   | 1 |   |   |   |  |  |  |  | tRNA (guanine-N(1)-)-methyltransferase                                                             |
| BAA196NC_1107 | HMPRNC0000_1249 | <i>rluD</i> |   |    |    |    |   |   |   |   | 1 | 1 |   |   |  |  |  |  | 23S rRNA pseudouridine synthase                                                                    |
| BAA196NC_1108 | HMPRNC0000_1237 | <i>yfiH</i> |   |    |    |    |   |   |   |   | 1 |   |   |   |  |  |  |  | Hypothetical protein                                                                               |
| BAA196NC_1109 | HMPRNC0000_1008 | <i>clpB</i> |   |    |    | 1  | 1 | 1 | 1 | 1 |   |   |   |   |  |  |  |  | Protein disaggregation chaperone                                                                   |
| BAA196NC_1165 | HMPRNC0000_1148 | <i>suhB</i> |   |    |    |    |   |   |   |   | 1 |   |   |   |  |  |  |  | Inositol monophosphatase                                                                           |
| BAA196NC_1169 | HMPRNC0000_0939 | <i>iscU</i> |   |    |    | 1  |   |   |   |   |   |   |   |   |  |  |  |  | Scaffold protein                                                                                   |
| BAA196NC_1181 | HMPRNC0000_1583 | <i>ndk</i>  |   |    |    |    | 1 |   |   |   |   |   |   |   |  |  |  |  | Nucleoside diphosphate kinase                                                                      |
| BAA196NC_1185 | HMPRNC0000_1762 | <i>hisS</i> |   | -1 |    |    |   |   |   |   |   |   |   |   |  |  |  |  | Histidyl-tRNA synthetase                                                                           |
| BAA196NC_1191 | HMPRNC0000_0434 | <i>guaB</i> | 1 | 1  |    |    |   |   |   |   |   |   |   |   |  |  |  |  | Inositol-5-monophosphate dehydrogenase                                                             |
| BAA196NC_1192 | HMPRNC0000_0435 | <i>guaA</i> | 1 | 1  |    |    |   |   |   |   |   |   |   |   |  |  |  |  | Bifunctional GMP synthase/glutamine amidotransferase protein                                       |
| BAA196NC_1200 | HMPRNC0000_1110 | <i>purN</i> |   |    |    |    |   |   |   |   | 1 |   |   |   |  |  |  |  | Phosphoribosylglycinamide formyltransferase                                                        |
| BAA196NC_1201 | HMPRNC0000_1109 | <i>purM</i> | 1 | 1  |    |    |   |   |   |   |   |   |   |   |  |  |  |  | Phosphoribosylaminoimidazole synthetase                                                            |
| BAA196NC_1202 | HMPRNC0000_2304 | <i>upp</i>  |   |    |    |    |   |   |   |   |   |   |   |   |  |  |  |  | Phosphoribosyltransferase                                                                          |
| BAA196NC_1203 | HMPRNC0000_1252 | <i>uraA</i> |   |    |    | 1  |   |   |   |   |   |   |   |   |  |  |  |  | Uracil transporter                                                                                 |
| BAA196NC_1220 | HMPRNC0000_2041 | <i>bcp</i>  |   |    |    |    | 1 |   |   |   |   |   |   |   |  |  |  |  | Thioredoxin-dependent thiol peroxidase                                                             |
| BAA196NC_1222 | HMPRNC0000_1502 | <i>dapA</i> |   |    |    |    |   |   |   |   |   |   |   |   |  |  |  |  | Dihydrodipicolinate synthase                                                                       |
| BAA196NC_1224 | HMPRNC0000_1101 | <i>purC</i> | 1 | 1  |    |    |   |   |   |   |   |   |   |   |  |  |  |  | Phosphoribosylaminoimidazole-succinocarboxamide synthase                                           |
| BAA196NC_1230 | HMPRNC0000_1030 | <i>yffB</i> |   |    |    |    |   |   |   |   |   |   |   |   |  |  |  |  | Hypothetical protein                                                                               |
| BAA196NC_1231 | HMPRNC0000_2477 | <i>acrD</i> |   |    |    |    |   |   |   |   |   |   |   |   |  |  |  |  | Aminoglycoside/multidrug efflux system                                                             |
| BAA196NC_1236 | HMPRNC0000_1439 | <i>tktB</i> |   |    |    | 1  |   |   |   |   |   |   |   |   |  |  |  |  | Transketolase 2, thiamin-binding                                                                   |
| BAA196NC_1272 | HMPRNC0000_0204 | <i>murP</i> |   |    |    |    |   |   |   |   |   |   |   |   |  |  |  |  | N-acetylmuramic acid phosphotransfer permease                                                      |
| BAA196NC_1273 | HMPRNC0000_0203 | <i>yfeU</i> |   |    |    |    |   |   |   |   |   |   |   |   |  |  |  |  | N-acetylmuramic acid-6-phosphate etherase                                                          |
| BAA196NC_1289 | HMPRNC0000_2088 | <i>ligA</i> |   |    |    |    |   |   |   |   |   |   |   |   |  |  |  |  | NAD-dependent DNA ligase LigA                                                                      |
| BAA196NC_1298 | HMPRNC0000_0571 | <i>glxX</i> |   |    |    |    |   |   |   |   |   |   |   |   |  |  |  |  | Glutamyl-tRNA synthetase                                                                           |
| BAA196NC_1303 | HMPRNC0000_0341 | <i>nupC</i> |   |    |    |    |   |   |   |   |   |   |   |   |  |  |  |  | Nucleoside (except guanosine) transporter                                                          |
| BAA196NC_1304 | HMPRNC0000_1146 | <i>mntH</i> |   |    |    |    |   |   |   |   |   |   |   |   |  |  |  |  | Manganese transport protein MntH                                                                   |
| BAA196NC_1377 | HMPRNC0000_1501 | <i>usg</i>  |   |    |    |    |   |   |   |   |   |   |   |   |  |  |  |  | Putative beta-semialdehyde dehydrogenase                                                           |
| BAA196NC_1378 | HMPRNC0000_2433 | <i>truA</i> |   |    |    |    |   |   |   |   |   |   |   |   |  |  |  |  | tRNA pseudouridine synthase A                                                                      |
| BAA196NC_1380 | HMPRNC0000_1833 | <i>accD</i> |   |    |    |    |   |   |   |   |   |   |   |   |  |  |  |  | Acetyl-CoA carboxylase subunit beta                                                                |
| BAA196NC_1381 | HMPRNC0000_1787 | <i>folC</i> |   |    |    |    |   |   |   |   | 1 | 1 | 1 | 1 |  |  |  |  | Bifunctional folypolyglutamate synthase/ dihydrofolate synthase                                    |
| BAA196NC_1384 | HMPRNC0000_1106 | <i>purF</i> | 1 | 1  |    |    |   |   |   |   |   |   |   |   |  |  |  |  | Amidophosphoribosyltransferase                                                                     |
| BAA196NC_1392 | HMPRNC0000_0857 | <i>yfcH</i> |   |    |    |    |   |   |   |   |   |   |   |   |  |  |  |  | Conserved protein with NAD(P)-binding Rossmann-fold domain                                         |
| BAA196NC_1393 | HMPRNC0000_0541 | <i>folX</i> |   |    |    |    |   |   |   |   |   |   |   |   |  |  |  |  | D-erythro-7,8-dihydroneopterin triphosphate 2'-epimerase and dihydroneopterin aldolase             |
| BAA196NC_1400 | HMPRNC0000_1846 | <i>ackA</i> |   |    |    |    |   |   |   |   |   |   |   |   |  |  |  |  | Acetate kinase                                                                                     |
| BAA196NC_1433 | HMPRNC0000_1074 | <i>menD</i> |   |    |    |    |   |   |   |   |   |   |   |   |  |  |  |  | 2-succinyl-6-hydroxy-2, 4-cyclohexadiene-1-carboxylate synthase                                    |
| BAA196NC_1459 | HMPRNC0000_0989 | <i>glpQ</i> |   |    |    |    |   |   |   |   |   |   |   |   |  |  |  |  | Periplasmic glycerophosphodiester phosphodiesterase                                                |
| BAA196NC_1467 | HMPRNC0000_1455 | <i>gyrA</i> |   |    |    |    |   |   |   |   |   |   |   |   |  |  |  |  | DNA gyrase subunit A                                                                               |
| BAA196NC_1474 | HMPRNC0000_0394 | <i>atoB</i> |   |    |    |    |   |   |   |   |   |   |   |   |  |  |  |  | Acetyl-CoA acetyltransferase                                                                       |
| BAA196NC_1600 | HMPRNC0000_2283 | <i>thiM</i> |   |    |    |    |   |   |   |   |   |   |   |   |  |  |  |  | Hydroxyethylthiazole kinase                                                                        |
| BAA196NC_1601 | HMPRNC0000_2284 | <i>thiD</i> |   |    |    |    |   |   |   |   |   |   |   |   |  |  |  |  | Phosphomethylpyrimidine kinase                                                                     |
| BAA196NC_1608 | HMPRNC0000_2322 | <i>gatY</i> |   |    |    |    |   |   |   |   |   |   |   |   |  |  |  |  | D-tagatose 1,6-bisphosphate aldolase 2, catalytic subunit                                          |
| BAA196NC_1615 | HMPRNC0000_0269 | <i>gatD</i> |   |    |    |    |   |   |   |   |   |   |   |   |  |  |  |  | Galactitol-1-phosphate dehydrogenase, Zn-dependent and NAD(P)-binding                              |
| BAA196NC_1625 | HMPRNC0000_1744 | <i>yegQ</i> |   |    |    |    |   |   |   |   |   |   |   |   |  |  |  |  | Predicted peptidase                                                                                |
| BAA196NC_1672 | HMPRNC0000_0128 | <i>rfbX</i> |   |    |    |    |   |   |   |   |   |   |   |   |  |  |  |  | Predicted polisoprenol-linked O-antigen transporter                                                |
| BAA196NC_1683 | HMPRNC0000_2982 | <i>hisI</i> |   |    |    |    |   |   |   |   |   |   |   |   |  |  |  |  | Bifunctional phosphoribosyl-AMP cyclohydrolase/phosphoribosyl-ATP pyrophosphatase protein          |
| BAA196NC_1684 | HMPRNC0000_2983 | <i>hisF</i> |   |    |    |    |   |   |   |   |   |   |   |   |  |  |  |  | Imidazole glycerol phosphate synthase subunit HisF                                                 |
| BAA196NC_1685 | HMPRNC0000_2984 | <i>hisA</i> |   |    |    |    |   |   |   |   |   |   |   |   |  |  |  |  | 1-(5-phosphoribosyl)-5-[(5-phosphoribosylamino)methylideneamino] imidazole-4-carboxamide isomerase |
| BAA196NC_1686 | HMPRNC0000_2985 | <i>hisH</i> |   |    |    |    |   |   |   |   |   |   |   |   |  |  |  |  | Imidazole glycerol phosphate synthase subunit HisH                                                 |
| BAA196NC_1688 | HMPRNC0000_0800 | <i>hisC</i> |   |    |    |    |   |   |   |   |   |   |   |   |  |  |  |  | Histidinol-phosphate aminotransferase                                                              |
| BAA196NC_1689 | HMPRNC0000_2989 | <i>hisD</i> |   |    |    |    |   |   |   |   |   |   |   |   |  |  |  |  | Histidinol dehydrogenase                                                                           |
| BAA196NC_1696 | HMPRNC0000_2220 | <i>yeeE</i> |   |    |    |    |   |   |   |   |   |   |   |   |  |  |  |  | Predicted inner membrane protein                                                                   |
| BAA196NC_1697 | HMPRNC0000_2219 | <i>yeeD</i> |   |    |    |    |   |   |   |   |   |   |   |   |  |  |  |  | Hypothetical protein                                                                               |
| BAA196NC_1737 | HMPRNC0000_0595 | <i>hchA</i> |   |    |    |    |   |   |   |   |   |   |   |   |  |  |  |  | Chaperone protein HchA                                                                             |
| BAA196NC_1780 | HMPRNC0000_2676 | <i>fliY</i> |   |    |    |    |   |   |   |   |   |   |   |   |  |  |  |  | Cystine transporter subunit                                                                        |
| BAA196NC_1782 | HMPRNC0000_2675 | <i>yecS</i> |   |    |    |    |   |   |   |   |   |   |   |   |  |  |  |  | Predicted transporter subunit: membrane component of ABC superfamily                               |
| BAA196NC_1783 | HMPRNC0000_2003 | <i>yecC</i> |   |    |    |    |   |   |   |   |   |   |   |   |  |  |  |  | Predicted transporter subunit: ATP-binding component of ABC superfamily                            |
| BAA196NC_1787 | HMPRNC0000_1194 | <i>uvrC</i> |   |    |    |    |   |   |   |   |   |   |   |   |  |  |  |  | Excinuclease ABC subunit C                                                                         |
| BAA196NC_1792 | HMPRNC0000_2078 | <i>ftnA</i> |   |    |    |    |   |   |   |   |   |   |   |   |  |  |  |  | Ferritin-like protein 2                                                                            |

|               |                 |              |    |    |    |    |    |    |                                                                                               |
|---------------|-----------------|--------------|----|----|----|----|----|----|-----------------------------------------------------------------------------------------------|
| BAA196NC_1819 | HMPRNC0000_0666 | <i>argS</i>  | 1  | 1  |    |    |    |    | Arginyl-tRNA synthetase                                                                       |
| BAA196NC_1829 | HMPRNC0000_1761 | <i>aspS</i>  |    |    | -1 |    |    |    | Aspartyl-tRNA synthetase                                                                      |
| BAA196NC_1836 | HMPRNC0000_0691 | <i>znuB</i>  |    |    | -1 | -1 |    |    | High-affinity zinc transporter membrane component                                             |
| BAA196NC_1844 | HMPRNC0000_1624 | <i>zwf</i>   |    |    |    |    | 1  |    | Glucose-6-phosphate 1-dehydrogenase                                                           |
| BAA196NC_1866 | HMPRNC0000_1857 | <i>yebR</i>  |    | 1  |    |    |    |    | Hypothetical protein                                                                          |
| BAA196NC_1920 | HMPRNC0000_1815 | <i>gapA</i>  |    |    | -1 | -1 |    |    | Glyceraldehyde-3-phosphate dehydrogenase                                                      |
| BAA196NC_1928 | HMPRNC0000_0658 | <i>ydjG</i>  |    |    |    |    | 1  |    | Predicted oxidoreductase                                                                      |
| BAA196NC_1936 | HMPRNC0000_2467 | <i>topB</i>  |    | -1 |    |    |    |    | DNA topoisomerase III                                                                         |
| BAA196NC_1938 | HMPRNC0000_0988 | <i>gdhA</i>  |    |    | -1 | -1 |    |    | Glutamate dehydrogenase                                                                       |
| BAA196NC_1949 | HMPRNC0000_0994 | <i>ydjX</i>  |    |    |    |    |    | -1 | Predicted inner membrane protein                                                              |
| BAA196NC_1963 | HMPRNC0000_2410 | <i>chbC</i>  | -1 |    | -1 | -1 | -1 |    | N,N'-diacetylchitobiose-specific enzyme IIC component of PTS                                  |
| BAA196NC_1977 | HMPRNC0000_2415 | <i>pfkB</i>  |    |    | -1 | -1 |    |    | 6-phosphofructokinase II                                                                      |
| BAA196NC_1980 | HMPRNC0000_1811 | <i>thrS</i>  |    |    |    | 1  | 1  |    | Threonyl-tRNA synthetase                                                                      |
| BAA196NC_1982 | HMPRNC0000_1808 | <i>rpmI</i>  | -1 |    |    |    |    |    | 50S ribosomal protein L35                                                                     |
| BAA196NC_1984 | HMPRNC0000_1185 | <i>pheS</i>  |    |    |    |    | -1 |    | Phenylalanyl-tRNA synthetase alpha subunit                                                    |
| BAA196NC_1998 | HMPRNC0000_0253 | <i>menE</i>  |    |    |    |    | -1 | -1 | Long-chain-fatty-acid--CoA ligase                                                             |
| BAA196NC_2006 | HMPRNC0000_0254 | <i>ydiF</i>  |    |    |    |    | -1 | 1  | Fused predicted acetyl-CoA:acetoacetyl-CoA transferase: alpha subunit/beta                    |
| BAA196NC_2008 | HMPRNC0000_1729 | <i>ydiB</i>  |    |    |    |    |    | -1 | subunit                                                                                       |
| BAA196NC_2022 | HMPRNC0000_0938 | <i>sufS</i>  |    |    |    |    |    | -1 | Quinate/shikimate 5-dehydrogenase, NAD(P)-binding                                             |
| BAA196NC_2039 | HMPRNC0000_1912 | <i>ribC</i>  |    |    |    |    | 1  |    | Selenocysteine lyase                                                                          |
| BAA196NC_2052 | HMPRNC0000_0986 | <i>nemaA</i> | 1  | 1  | 1  | 1  | 1  |    | Riboflavin synthase subunit alpha                                                             |
| BAA196NC_2055 | HMPRNC0000_0756 | <i>ydhF</i>  |    |    |    |    |    | -1 | N-ethylmaleimide reductase, FMN-linked                                                        |
| BAA196NC_2092 | HMPRNC0000_1996 | <i>fumC</i>  |    |    | -1 | -1 |    |    | Predicted oxidoreductase                                                                      |
| BAA196NC_2163 | HMPRNC0000_2754 | <i>ydfG</i>  |    |    |    |    | 1  |    | Fumarate hydratase                                                                            |
| BAA196NC_2253 | HMPRNC0000_2406 | <i>yncB</i>  |    |    | 1  | 1  |    |    | L-allo-threonine dehydrogenase, NAD(P)-binding                                                |
| BAA196NC_2276 | HMPRNC0000_0376 | <i>rimL</i>  |    |    |    |    | 1  |    | Predicted oxidoreductase, Zn-dependent and NAD(P)-binding                                     |
| BAA196NC_2288 | HMPRNC0000_2317 | <i>aldA</i>  | 1  | 1  |    |    |    |    | Ribosomal-protein-L7/L12-serine acetyltransferase                                             |
| BAA196NC_2291 | HMPRNC0000_0226 | <i>azoR</i>  | 1  | 1  | 1  | 1  |    |    | Aldehyde dehydrogenase A, NAD-linked                                                          |
| BAA196NC_2361 | HMPRNC0000_0093 | <i>abgA</i>  |    |    |    |    |    |    | Acyl carrier protein phosphodiesterase                                                        |
| BAA196NC_2361 | HMPRNC0000_1505 | .            |    |    |    |    |    | -1 | Predicted peptidase, aminobenzoyl-glutamate utilization protein                               |
| BAA196NC_2376 | HMPRNC0000_1849 | <i>tpx</i>   |    |    |    |    | 1  |    | N-acetyl-L,L-diaminopimelate deacetylase                                                      |
| BAA196NC_2385 | HMPRNC0000_0232 | <i>ycjS</i>  |    |    |    |    | -1 |    | Thiol peroxidase                                                                              |
| BAA196NC_2412 | HMPRNC0000_1044 | <i>fabI</i>  |    |    |    |    | 1  |    | Predicted oxidoreductase, NADH-binding                                                        |
| BAA196NC_2420 | HMPRNC0000_1257 | <i>pyrF</i>  |    |    |    | 1  | 1  |    | Enoyl-(acyl carrier protein) reductase                                                        |
| BAA196NC_2425 | HMPRNC0000_1449 | <i>acnA</i>  | 1  |    | -1 | -1 |    |    | Orotidine 5'-phosphate decarboxylase                                                          |
| BAA196NC_2428 | HMPRNC0000_1315 | <i>topA</i>  |    |    |    |    | 1  | 1  | Aconitate hydratase                                                                           |
| BAA196NC_2440 | HMPRNC0000_1473 | <i>trpB</i>  | 1  | 1  |    | -1 | -1 |    | DNA topoisomerase I                                                                           |
| BAA196NC_2441 | HMPRNC0000_1474 | <i>trpA</i>  | 1  | 1  |    | -1 | -1 | -1 | Tryptophan synthase subunit beta                                                              |
| BAA196NC_2454 | HMPRNC0000_1022 | <i>oppF</i>  |    |    |    |    | -1 | -1 | Tryptophan synthase subunit alpha                                                             |
| BAA196NC_2455 | HMPRNC0000_1021 | <i>oppD</i>  | 1  |    | -1 | -1 | -1 | -1 | Oligopeptide transporter subunit                                                              |
| BAA196NC_2456 | HMPRNC0000_1020 | <i>oppC</i>  |    |    | -1 | -1 | -1 | -1 | Oligopeptide transporter ATP-binding component                                                |
| BAA196NC_2457 | HMPRNC0000_1019 | <i>oppB</i>  |    |    | -1 | -1 | -1 | -1 | Oligopeptide transporter subunit                                                              |
| BAA196NC_2458 | HMPRNC0000_1023 | <i>oppA</i>  | 1  |    | -1 | -1 | -1 | -1 | Oligopeptide permease ABC transporter membrane protein                                        |
| BAA196NC_2473 | HMPRNC0000_2652 | <i>narH</i>  |    |    | -1 | -1 | -1 |    | Oligopeptide transporter subunit                                                              |
| BAA196NC_2474 | HMPRNC0000_2655 | <i>narG</i>  | 1  | 1  | 1  | 1  | 1  |    | Nitrate reductase 1, beta (Fe-S) subunit                                                      |
| BAA196NC_2475 | HMPRNC0000_2644 | <i>narK</i>  |    |    | 1  | -1 | -1 |    | Nitrate reductase 1, alpha subunit                                                            |
| BAA196NC_2478 | HMPRNC0000_2068 | <i>narL</i>  |    |    |    |    |    |    | Nitrate/nitrite transporter                                                                   |
| BAA196NC_2497 | HMPRNC0000_0517 | <i>ispE</i>  | -1 |    | 1  |    |    | -1 | DNA-binding response regulator in two-component regulatory system with NarX (or NarQ)         |
| BAA196NC_2502 | HMPRNC0000_0407 | <i>ychF</i>  |    |    |    |    | 1  |    | 4-diphosphocytidyl-2-C-methyl-D-erythritol kinase                                             |
| BAA196NC_2565 | HMPRNC0000_1825 | <i>icd</i>   | 1  | 1  | -1 | -1 |    |    | Translation-associated GTPase                                                                 |
| BAA196NC_2568 | HMPRNC0000_1753 | <i>trmU</i>  |    |    |    |    | 1  |    | Isocitrate dehydrogenase                                                                      |
| BAA196NC_2589 | HMPRNC0000_0525 | <i>mfd</i>   |    |    |    |    | 1  | 1  | trNA (5-methylaminomethyl-2-thiouridylate)-methyltransferase                                  |
| BAA196NC_2594 | HMPRNC0000_0966 | <i>ndh</i>   |    |    |    |    | 1  |    | Transcription-repair coupling factor                                                          |
| BAA196NC_2610 | HMPRNC0000_1292 | <i>acpP</i>  | -1 | 1  |    |    |    |    | Respiratory NADH dehydrogenase 2/cupric reductase                                             |
| BAA196NC_2611 | HMPRNC0000_1290 | <i>fabG</i>  | -1 |    |    |    |    | 1  | Acyl carrier protein                                                                          |
| BAA196NC_2612 | HMPRNC0000_1289 | <i>fabD</i>  |    |    |    |    | 1  | 1  | 3-oxoacyl-[acyl-carrier-protein] reductase                                                    |
| BAA196NC_2613 | HMPRNC0000_1015 | <i>fabH</i>  |    |    |    |    | 1  | 1  | Acyl carrier protein S-malonyltransferase                                                     |
| BAA196NC_2682 | HMPRNC0000_0380 | <i>ycdB</i>  |    |    |    |    | 1  |    | 3-oxoacyl-(acyl carrier protein) synthase                                                     |
| BAA196NC_2685 | HMPRNC0000_2087 | <i>putP</i>  |    |    |    |    | -1 |    | Hypothetical protein                                                                          |
| BAA196NC_2710 | HMPRNC0000_1509 | <i>cspG</i>  |    |    | -1 | -1 |    | -1 | Proline:sodium symporter                                                                      |
| BAA196NC_2731 | HMPRNC0000_1511 | <i>yccX</i>  |    |    |    |    | 1  |    | DNA-binding transcriptional regulator                                                         |
| BAA196NC_2755 | HMPRNC0000_2876 | <i>pyrD</i>  |    |    |    |    | -1 |    | Predicted acylphosphatase                                                                     |
| BAA196NC_2766 | HMPRNC0000_0177 | <i>ssuC</i>  |    |    |    |    | 1  | 1  | Dihydroxyacetate dehydrogenase                                                                |
| BAA196NC_2767 | HMPRNC0000_0175 | <i>ssuB</i>  |    |    |    |    | 1  | 1  | Alkanesulfonate transporter subunit                                                           |
| BAA196NC_2773 | HMPRNC0000_1674 | <i>ycbL</i>  |    |    |    |    | 1  | 1  | Alkanesulfonate transporter subunit                                                           |
| BAA196NC_2786 | HMPRNC0000_2045 | <i>msbA</i>  |    |    |    |    | 1  | 1  | Predicted metal-binding enzyme                                                                |
| BAA196NC_2796 | HMPRNC0000_2662 | <i>focA</i>  |    |    |    |    | -1 | -1 | Fused lipid transporter subunits of ABC superfamily: membrane component/ATP-binding component |
| BAA196NC_2797 | HMPRNC0000_0241 | <i>pfIB</i>  | -1 |    |    |    |    |    | Formate transporter                                                                           |
| BAA196NC_2808 | HMPRNC0000_1758 | <i>ycal</i>  |    |    |    |    |    | -1 | Pyruvate formate lyase I                                                                      |
| BAA196NC_2812 | HMPRNC0000_0851 | <i>trxB</i>  |    |    |    |    | 1  | 1  | Recombination protein                                                                         |
| BAA196NC_2828 | HMPRNC0000_2817 | <i>poxB</i>  | 1  |    |    |    | -1 | -1 | Thioredoxin reductase, FAD/NAD(P)-binding                                                     |
| BAA196NC_2842 | HMPRNC0000_1142 | <i>potI</i>  |    |    |    |    | -1 |    | Pyruvate dehydrogenase                                                                        |
| BAA196NC_2850 | HMPRNC0000_0426 | <i>nfsA</i>  |    |    |    |    | 1  |    | Putrescine transporter subunit: membrane component of ABC superfamily                         |
| BAA196NC_2882 | HMPRNC0000_1497 | <i>ybiT</i>  |    |    |    |    | 1  |    | Nitroreductase A, NADPH-dependent, FMN-dependent                                              |
| BAA196NC_2890 | HMPRNC0000_2340 | <i>dps</i>   | -1 | -1 | 1  | 1  | 1  | 1  | Fused predicted transporter subunits of ABC superfamily: ATP-binding components               |
|               |                 |              |    |    |    |    |    |    | DNA protection during starvation conditions                                                   |

|               |                 |             |    |    |    |    |    |    |                                                                                       |                       |
|---------------|-----------------|-------------|----|----|----|----|----|----|---------------------------------------------------------------------------------------|-----------------------|
| BAA196NC_2917 | HMPRNC0000_2490 | <i>moaE</i> |    |    |    | 1  | 1  | 1  | Molybdopterin synthase, large subunit                                                 |                       |
| BAA196NC_2919 | HMPRNC0000_2494 | <i>moaC</i> |    | 1  |    |    |    |    | Molybdenum cofactor biosynthesis protein C                                            |                       |
| BAA196NC_2920 | HMPRNC0000_2495 | <i>moaB</i> |    | 1  | 1  |    |    |    | Molybdopterin biosynthesis protein B                                                  |                       |
| BAA196NC_2921 | HMPRNC0000_2486 | <i>moaA</i> | 1  |    |    | 1  | 1  | 1  | Molybdenum cofactor biosynthesis protein A                                            |                       |
| BAA196NC_2923 | HMPRNC0000_0842 | <i>uvrB</i> |    |    |    |    |    | -1 | Excinuclease ABC subunit B                                                            |                       |
| BAA196NC_2928 | HMPRNC0000_2696 | <i>bioA</i> |    |    |    |    |    | -1 | Adenosylmethionine--8-amino-7-oxononanoate transaminase                               |                       |
| BAA196NC_3009 | HMPRNC0000_2679 | <i>gpmA</i> |    |    |    | 1  |    |    | Phosphoglyceromutase                                                                  |                       |
| BAA196NC_3012 | HMPRNC0000_2350 | <i>zitB</i> |    |    |    | 1  | 1  | 1  | 1                                                                                     | Zinc transporter ZitB |
| BAA196NC_3025 | HMPRNC0000_1124 | <i>cydA</i> |    |    |    |    | 1  | 1  | Cytochrome d terminal oxidase, subunit I                                              |                       |
| BAA196NC_3030 | HMPRNC0000_1313 | <i>sucD</i> | 1  |    |    | -1 |    | -1 | Succinyl-CoA synthetase subunit alpha                                                 |                       |
| BAA196NC_3031 | HMPRNC0000_1312 | <i>sucC</i> | 1  | -1 | -1 | -1 |    | -1 | Succinyl-CoA synthetase subunit beta                                                  |                       |
| BAA196NC_3032 | HMPRNC0000_1519 | <i>sucB</i> | 1  | -1 | -1 | -1 |    | -1 | Dihydrolipoamide acetyltransferase                                                    |                       |
| BAA196NC_3033 | HMPRNC0000_1520 | <i>sucA</i> | 1  |    | -1 | -1 |    | -1 | Alpha-ketoglutarate decarboxylase                                                     |                       |
| BAA196NC_3034 | HMPRNC0000_1198 | <i>sdhB</i> | 1  |    | -1 | -1 |    | -1 | Succinate dehydrogenase, FeS subunit                                                  |                       |
| BAA196NC_3035 | HMPRNC0000_1197 | <i>sdhA</i> | 1  | 1  | -1 | -1 |    | -1 | Succinate dehydrogenase flavoprotein subunit                                          |                       |
| BAA196NC_3037 | HMPRNC0000_1195 | <i>sdhC</i> |    |    | -1 | -1 |    |    | Succinate dehydrogenase cytochrome b556 large membrane subunit                        |                       |
| BAA196NC_3046 | HMPRNC0000_1739 | <i>ybgK</i> | 1  |    |    |    |    |    | Predicted enzyme subunit                                                              |                       |
| BAA196NC_3047 | HMPRNC0000_1740 | <i>ybgJ</i> |    | 1  |    |    |    |    | Predicted enzyme subunit                                                              |                       |
| BAA196NC_3050 | HMPRNC0000_0760 | <i>phr</i>  |    |    |    | -1 |    | -1 | Deoxyribodipyrimidine photolyase, FAD-binding                                         |                       |
| BAA196NC_3061 | HMPRNC0000_2263 | <i>kdpB</i> |    |    |    |    |    | -1 | 1 Potassium-transporting ATPase subunit B                                             |                       |
| BAA196NC_3062 | HMPRNC0000_2262 | <i>kdpC</i> |    |    |    |    |    | -1 | 1 Potassium-transporting ATPase subunit C                                             |                       |
| BAA196NC_3064 | HMPRNC0000_2267 | <i>kdpE</i> |    |    |    |    |    | -1 | DNA-binding response regulator in two-component regulatory system with KdpD           |                       |
| BAA196NC_3080 | HMPRNC0000_2816 | <i>nagE</i> |    |    |    |    |    |    | -1 Fused N-acetyl glucosamine specific PTS enzyme: IIC, IIB , and IIA components      |                       |
| BAA196NC_3088 | HMPRNC0000_1359 | <i>miaB</i> |    | 1  |    |    |    |    | Isopentenyl-adenosine A37 tRNA methylthiolase                                         |                       |
| BAA196NC_3098 | HMPRNC0000_0263 | <i>rihA</i> |    | -1 |    |    |    |    | Ribonucleoside hydrolase 1                                                            |                       |
| BAA196NC_3107 | HMPRNC0000_1903 | <i>leuS</i> |    |    |    |    | 1  | 1  | Leucyl-tRNA synthetase                                                                |                       |
| BAA196NC_3115 | HMPRNC0000_2703 | <i>mrdB</i> |    |    |    | -1 |    | -1 | Cell wall shape-determining protein                                                   |                       |
| BAA196NC_3126 | HMPRNC0000_1509 | <i>cspE</i> | -1 |    |    | -1 |    | -1 | -1 Cold shock protein E                                                               |                       |
| BAA196NC_3143 | HMPRNC0000_0424 | <i>ahpF</i> |    | 1  |    |    |    |    | 1 Alkyl hydroperoxide reductase, F52a subunit, FAD/NAD(P)-binding                     |                       |
| BAA196NC_3160 | HMPRNC0000_0710 | <i>fepD</i> |    |    |    | 1  |    |    | Iron-enterobactin transporter subunit                                                 |                       |
| BAA196NC_3162 | HMPRNC0000_0708 | <i>fepC</i> |    |    |    | 1  | 1  |    | Iron-enterobactin transporter subunit                                                 |                       |
| BAA196NC_3175 | HMPRNC0000_2797 | <i>nfnB</i> |    |    |    |    | 1  | 1  | 1 Dihydropteridine reductase, NAD(P)H-dependent, oxygen-insensitive                   |                       |
| BAA196NC_3229 | HMPRNC0000_0573 | <i>cysS</i> |    | 1  |    |    | 1  |    | CysteinyI-tRNA synthetase                                                             |                       |
| BAA196NC_3230 | HMPRNC0000_0984 | <i>ppiB</i> |    |    |    | 1  | 1  |    | -1 Peptidyl-prolyl cis-trans isomerase B (rotamase B)                                 |                       |
| BAA196NC_3232 | HMPRNC0000_1099 | <i>purE</i> |    |    |    | -1 | -1 | -1 | -1 Phosphoribosylaminoimidazole carboxylase catalytic subunit                         |                       |
| BAA196NC_3233 | HMPRNC0000_1100 | <i>purK</i> |    | -1 |    | -1 |    | -1 | Phosphoribosylaminoimidazole carboxylase                                              |                       |
| BAA196NC_3241 | HMPRNC0000_2704 | <i>glxK</i> |    |    |    |    |    |    | -1 Glycerate kinase II                                                                |                       |
| BAA196NC_3243 | HMPRNC0000_1254 | <i>allB</i> |    |    |    | -1 | 1  | -1 | 1 Allantoinase                                                                        |                       |
| BAA196NC_3262 | HMPRNC0000_2727 | <i>ybbM</i> |    |    |    |    | -1 | -1 | putative iron export permease protein FetB                                            |                       |
| BAA196NC_3269 | HMPRNC0000_2838 | <i>capA</i> | 1  | 1  | 1  | 1  | 1  | 1  | 1 Copper transporter                                                                  |                       |
| BAA196NC_3285 | HMPRNC0000_1767 | <i>apt</i>  |    |    |    |    | 1  |    | Adenine phosphoribosyltransferase                                                     |                       |
| BAA196NC_3314 | HMPRNC0000_1588 | <i>hupB</i> |    |    | -1 |    | -1 | -1 | 1 HU, DNA-binding transcriptional regulator, beta subunit                             |                       |
| BAA196NC_3317 | HMPRNC0000_0856 | <i>clpP</i> |    |    |    |    | 1  | 1  | 1 ATP-dependent Clp protease proteolytic subunit                                      |                       |
| BAA196NC_3324 | HMPRNC0000_1094 | <i>cyoB</i> | 1  | 1  |    | -1 |    |    | Cytochrome o ubiquinol oxidase subunit I                                              |                       |
| BAA196NC_3327 | HMPRNC0000_1158 | <i>cyoE</i> | 1  | 1  |    |    |    |    | Protoheme IX farnesyltransferase                                                      |                       |
| BAA196NC_3349 | HMPRNC0000_1770 | <i>tgt</i>  |    |    |    |    | 1  | 1  | Queuine tRNA-ribosyltransferase                                                       |                       |
| BAA196NC_3354 | HMPRNC0000_0191 | <i>brnQ</i> |    |    |    | -1 |    | -1 | Predicted branched chain amino acid transporter (LIV-II)                              |                       |
| BAA196NC_3356 | HMPRNC0000_1610 | <i>phoB</i> |    | 1  |    |    | -1 |    | DNA-binding response regulator in two-component regulatory system with PhoR (or CreC) |                       |
| BAA196NC_3366 | HMPRNC0000_1666 | <i>arol</i> |    |    |    | -1 | -1 | -1 | -1 Shikimate kinase II                                                                |                       |
| BAA196NC_3387 | HMPRNC0000_1796 | <i>hemB</i> |    | 1  | 1  |    |    |    | Delta-aminolevulinic acid dehydratase                                                 |                       |
| BAA196NC_3399 | HMPRNC0000_2275 | <i>frmR</i> |    |    |    | 1  |    |    | Regulator protein that represses frmRAB operon                                        |                       |
| BAA196NC_3423 | HMPRNC0000_1826 | <i>prpC</i> |    |    |    | -1 |    | -1 | 1 2-methylcitrate synthase                                                            |                       |
| BAA196NC_3442 | HMPRNC0000_2404 | <i>betT</i> |    | 1  |    |    |    |    | -1 Choline transporter of high affinity                                               |                       |
| BAA196NC_3444 | HMPRNC0000_2903 | <i>betB</i> |    |    |    |    |    | -1 | Betaine aldehyde dehydrogenase, NAD-dependent                                         |                       |
| BAA196NC_3459 | HMPRNC0000_2315 | <i>ykgM</i> |    | 1  |    | -1 |    |    | 50S ribosomal protein L31                                                             |                       |
| BAA196NC_3510 | HMPRNC0000_2080 | <i>dinB</i> |    |    |    |    | 1  | 1  | DNA polymerase IV                                                                     |                       |
| BAA196NC_3522 | HMPRNC0000_2205 | <i>yafV</i> |    |    |    |    | 1  | 1  | Predicted C-N hydrolase family amidase, NAD(P)-binding                                |                       |
| BAA196NC_3536 | HMPRNC0000_0477 | <i>metN</i> |    |    |    |    | 1  | 1  | DL-methionine transporter subunit                                                     |                       |
| BAA196NC_3537 | HMPRNC0000_0478 | <i>metI</i> |    |    |    |    | 1  | 1  | DL-methionine transporter subunit                                                     |                       |
| BAA196NC_3538 | HMPRNC0000_0479 | <i>metQ</i> |    |    |    |    | 1  | 1  | DL-methionine transporter subunit                                                     |                       |
| BAA196NC_3541 | HMPRNC0000_1327 | <i>proS</i> |    |    |    |    | 1  | 1  | Prolyl-tRNA synthetase                                                                |                       |
| BAA196NC_3556 | HMPRNC0000_2291 | <i>fabZ</i> |    | 1  | 1  |    |    |    | (3R)-hydroxymyristoyl ACP dehydratase                                                 |                       |
| BAA196NC_3565 | HMPRNC0000_1323 | <i>frr</i>  |    |    |    | -1 |    |    | Ribosome releasing factor                                                             |                       |
| BAA196NC_3566 | HMPRNC0000_1322 | <i>pyrH</i> |    | 1  |    | -1 |    | -1 | Uridylate kinase                                                                      |                       |
| BAA196NC_3571 | HMPRNC0000_2072 | <i>map</i>  |    |    |    |    |    |    | -1 Methionine aminopeptidase                                                          |                       |
| BAA196NC_3582 | HMPRNC0000_0965 | <i>yadR</i> |    | 1  |    | 1  | 1  | 1  | Hypothetical protein                                                                  |                       |
| BAA196NC_3604 | HMPRNC0000_2886 | <i>panB</i> |    |    |    | 1  | 1  |    | 3-methyl-2-oxobutanoate hydroxymethyltransferase                                      |                       |
| BAA196NC_3605 | HMPRNC0000_2885 | <i>panC</i> |    |    |    | 1  | 1  |    | Pantoate--beta-alanine ligase                                                         |                       |
| BAA196NC_3633 | HMPRNC0000_1433 | <i>guaC</i> |    |    |    |    |    | -1 | Guanosine 5'-monophosphate oxidoreductase                                             |                       |
| BAA196NC_3634 | HMPRNC0000_1816 | <i>coaE</i> |    |    |    | 1  | 1  | 1  | Dephospho-CoA kinase                                                                  |                       |
| BAA196NC_3647 | HMPRNC0000_1154 | <i>ftsW</i> | -1 |    | -1 |    |    |    | Integral membrane protein involved in stabilizing FtsZ ring during cell division      |                       |
| BAA196NC_3648 | HMPRNC0000_1232 | <i>murD</i> |    |    |    | -1 |    | -1 | UDP-N-acetylmuramoyl-L-alanyl-D-glutamate synthetase                                  |                       |
| BAA196NC_3649 | HMPRNC0000_1231 | <i>mraY</i> |    |    |    | -1 |    | -1 | Phospho-N-acetylmuramoyl-pentapeptide- transferase                                    |                       |
| BAA196NC_3650 | HMPRNC0000_2269 | <i>murF</i> |    |    |    |    |    | -1 | UDP-N-acetylmuramoyl-tripeptide:D-alanyl-D- alanine ligase                            |                       |

|               |                 |             |  |  |  |  |  |  |  |  |  |                                                                                 |
|---------------|-----------------|-------------|--|--|--|--|--|--|--|--|--|---------------------------------------------------------------------------------|
| BAA196NC_3651 | HMPRNC0000_1053 | <i>murE</i> |  |  |  |  |  |  |  |  |  | UDP-N-acetylmuramoylanyl-D-glutamate--2, 6-diaminopimelate ligase               |
| BAA196NC_3654 | HMPRNC0000_1229 | <i>mraW</i> |  |  |  |  |  |  |  |  |  | S-adenosyl-methyltransferase                                                    |
| BAA196NC_3655 | HMPRNC0000_1228 | <i>mraZ</i> |  |  |  |  |  |  |  |  |  | Hypothetical protein                                                            |
| BAA196NC_3658 | HMPRNC0000_2233 | <i>ilvI</i> |  |  |  |  |  |  |  |  |  | Acetolactate synthase III large subunit                                         |
| BAA196NC_3660 | HMPRNC0000_2236 | <i>leuA</i> |  |  |  |  |  |  |  |  |  | 2-isopropylmalate synthase                                                      |
| BAA196NC_3661 | HMPRNC0000_2239 | <i>leuB</i> |  |  |  |  |  |  |  |  |  | 3-isopropylmalate dehydrogenase                                                 |
| BAA196NC_3662 | HMPRNC0000_2240 | <i>leuC</i> |  |  |  |  |  |  |  |  |  | Isopropylmalate isomerase large subunit                                         |
| BAA196NC_3684 | HMPRNC0000_0515 | <i>ksgA</i> |  |  |  |  |  |  |  |  |  | Dimethyladenosine transferase                                                   |
| BAA196NC_3688 | HMPRNC0000_1043 | <i>kefC</i> |  |  |  |  |  |  |  |  |  | Glutathione-regulated potassium-efflux system protein                           |
| BAA196NC_3703 | HMPRNC0000_1256 | <i>carB</i> |  |  |  |  |  |  |  |  |  | Carbamoyl-phosphate synthase large subunit                                      |
| BAA196NC_3704 | HMPRNC0000_1255 | <i>carA</i> |  |  |  |  |  |  |  |  |  | Carbamoyl-phosphate synthase small subunit                                      |
| BAA196NC_3712 | HMPRNC0000_1716 | <i>rpsT</i> |  |  |  |  |  |  |  |  |  | 30S ribosomal protein S20                                                       |
| BAA196NC_3720 | HMPRNC0000_1708 | <i>dnaJ</i> |  |  |  |  |  |  |  |  |  | Chaperone Hsp40, co-chaperone with DnaK                                         |
| BAA196NC_3731 | HMPRNC0000_1425 | <i>thrB</i> |  |  |  |  |  |  |  |  |  | Homoserine kinase                                                               |
| BAA196NC_3740 | HMPRNC0000_0892 | <i>ytjC</i> |  |  |  |  |  |  |  |  |  | Phosphoglycerate mutase                                                         |
| BAA196NC_3744 | HMPRNC0000_0794 | <i>yjjK</i> |  |  |  |  |  |  |  |  |  | Fused predicted transporter subunits of ABC superfamily: ATP-binding components |
| BAA196NC_3752 | HMPRNC0000_2339 | <i>deoD</i> |  |  |  |  |  |  |  |  |  | Purine nucleoside phosphorylase                                                 |
| BAA196NC_3753 | HMPRNC0000_0135 | <i>deoB</i> |  |  |  |  |  |  |  |  |  | Phosphopentomutase                                                              |
| BAA196NC_3783 | HMPRNC0000_0463 | <i>yjiA</i> |  |  |  |  |  |  |  |  |  | Predicted GTPase                                                                |
| BAA196NC_3845 | HMPRNC0000_2771 | <i>yjhF</i> |  |  |  |  |  |  |  |  |  | KpLE2 phage-like element; predicted transporter                                 |
| BAA196NC_3880 | HMPRNC0000_1788 | <i>valS</i> |  |  |  |  |  |  |  |  |  | Valyl-tRNA synthetase                                                           |
| BAA196NC_3891 | HMPRNC0000_1253 | <i>pyrB</i> |  |  |  |  |  |  |  |  |  | Aspartate carbamoyltransferase catalytic subunit                                |
| BAA196NC_3893 | HMPRNC0000_0519 | <i>yjgF</i> |  |  |  |  |  |  |  |  |  | Ketoacid-binding protein                                                        |
| BAA196NC_3896 | HMPRNC0000_2632 | <i>treB</i> |  |  |  |  |  |  |  |  |  | Fused trehalose(maltose)-specific PTS enzyme: IIB component/IIC component       |
| BAA196NC_3897 | HMPRNC0000_0491 | <i>treC</i> |  |  |  |  |  |  |  |  |  | Trehalose-6-P hydrolase                                                         |
| BAA196NC_3898 | HMPRNC0000_2908 | <i>nrdD</i> |  |  |  |  |  |  |  |  |  | Anaerobic ribonucleoside triphosphate reductase                                 |
| BAA196NC_3903 | HMPRNC0000_1885 | <i>murC</i> |  |  |  |  |  |  |  |  |  | UDP-N-acetylmuramate--L-alanine ligase                                          |
| BAA196NC_3926 | HMPRNC0000_2710 | <i>cycA</i> |  |  |  |  |  |  |  |  |  | D-alanine/D-serine/glycine transporter                                          |
| BAA196NC_3938 | HMPRNC0000_0619 | <i>ulaD</i> |  |  |  |  |  |  |  |  |  | 3-keto-L-gulonate 6-phosphate decarboxylase                                     |
| BAA196NC_3954 | HMPRNC0000_0575 | <i>rlmB</i> |  |  |  |  |  |  |  |  |  | 23S rRNA (Gm2251)-methyltransferase                                             |
| BAA196NC_3955 | HMPRNC0000_0870 | <i>rrn</i>  |  |  |  |  |  |  |  |  |  | Exoribonuclease R, RNase R                                                      |
| BAA196NC_3957 | HMPRNC0000_0018 | <i>purA</i> |  |  |  |  |  |  |  |  |  | Adenylosuccinate synthetase                                                     |
| BAA196NC_3961 | HMPRNC0000_1373 | <i>hflX</i> |  |  |  |  |  |  |  |  |  | Predicted GTPase                                                                |
| BAA196NC_3977 | HMPRNC0000_1197 | <i>frdA</i> |  |  |  |  |  |  |  |  |  | Fumarate reductase                                                              |
| BAA196NC_3978 | HMPRNC0000_1198 | <i>frdB</i> |  |  |  |  |  |  |  |  |  | Fumarate reductase (anaerobic), Fe-S subunit                                    |
| BAA196NC_3986 | HMPRNC0000_1654 | <i>efp</i>  |  |  |  |  |  |  |  |  |  | Elongation factor P                                                             |
| BAA196NC_3990 | HMPRNC0000_2200 | <i>groL</i> |  |  |  |  |  |  |  |  |  | Chaperonin GroEL                                                                |
| BAA196NC_3991 | HMPRNC0000_2201 | <i>groS</i> |  |  |  |  |  |  |  |  |  | Co-chaperonin GroES                                                             |
| BAA196NC_4003 | HMPRNC0000_0543 | <i>lysU</i> |  |  |  |  |  |  |  |  |  | Lysine tRNA synthetase, inducible                                               |
| BAA196NC_4006 | HMPRNC0000_2794 | <i>yjdJ</i> |  |  |  |  |  |  |  |  |  | Predicted acyltransferase with acyl-CoA N-acyltransferase domain                |
| BAA196NC_4026 | HMPRNC0000_2879 | <i>phnB</i> |  |  |  |  |  |  |  |  |  | Hypothetical protein                                                            |
| BAA196NC_4057 | HMPRNC0000_2640 | <i>gltP</i> |  |  |  |  |  |  |  |  |  | Glutamate/aspartate:proton symporter                                            |
| BAA196NC_4065 | HMPRNC0000_1877 | <i>acs</i>  |  |  |  |  |  |  |  |  |  | Acetyl-coenzyme A synthetase                                                    |
| BAA196NC_4078 | HMPRNC0000_0843 | <i>uvrA</i> |  |  |  |  |  |  |  |  |  | Excinuclease ABC subunit A                                                      |
| BAA196NC_4095 | HMPRNC0000_1436 | <i>lexA</i> |  |  |  |  |  |  |  |  |  | LexA repressor                                                                  |
| BAA196NC_4104 | HMPRNC0000_0229 | <i>malE</i> |  |  |  |  |  |  |  |  |  | Maltose ABC transporter periplasmic protein                                     |
| BAA196NC_4106 | HMPRNC0000_0231 | <i>malG</i> |  |  |  |  |  |  |  |  |  | Maltose transporter subunit                                                     |
| BAA196NC_4128 | HMPRNC0000_1111 | <i>purH</i> |  |  |  |  |  |  |  |  |  | Bifunctional phosphoribosylaminoimidazolecarboxamide formyltransferase/IMP      |
| BAA196NC_4129 | HMPRNC0000_1112 | <i>purD</i> |  |  |  |  |  |  |  |  |  | cyclohydrolase                                                                  |
| BAA196NC_4134 | HMPRNC0000_1588 | <i>hupA</i> |  |  |  |  |  |  |  |  |  | Phosphoribosylamine--glycine ligase                                             |
| BAA196NC_4137 | HMPRNC0000_1977 | <i>hemE</i> |  |  |  |  |  |  |  |  |  | HU, DNA-binding transcriptional regulator, alpha subunit                        |
| BAA196NC_4141 | HMPRNC0000_2282 | <i>thiE</i> |  |  |  |  |  |  |  |  |  | Uroporphyrinogen decarboxylase                                                  |
| BAA196NC_4148 | HMPRNC0000_0585 | <i>rpoB</i> |  |  |  |  |  |  |  |  |  | Thiamine-phosphate pyrophosphorylase                                            |
| BAA196NC_4150 | HMPRNC0000_0582 | <i>rplJ</i> |  |  |  |  |  |  |  |  |  | DNA-directed RNA polymerase subunit beta                                        |
| BAA196NC_4151 | HMPRNC0000_0581 | <i>rplA</i> |  |  |  |  |  |  |  |  |  | 50S ribosomal protein L10                                                       |
| BAA196NC_4152 | HMPRNC0000_0580 | <i>rplK</i> |  |  |  |  |  |  |  |  |  | 50S ribosomal protein L1                                                        |
| BAA196NC_4153 | HMPRNC0000_0579 | <i>nusG</i> |  |  |  |  |  |  |  |  |  | 50S ribosomal protein L11                                                       |
| BAA196NC_4168 | HMPRNC0000_0990 | <i>argH</i> |  |  |  |  |  |  |  |  |  | Transcription antitermination protein NusG                                      |
| BAA196NC_4171 | HMPRNC0000_2193 | <i>dapE</i> |  |  |  |  |  |  |  |  |  | Argininosuccinate lyase                                                         |
| BAA196NC_4188 | HMPRNC0000_0476 | <i>metB</i> |  |  |  |  |  |  |  |  |  | Acetylornithine deacetylase                                                     |
| BAA196NC_4192 | HMPRNC0000_1267 | <i>priA</i> |  |  |  |  |  |  |  |  |  | Cystathionine gamma-synthase                                                    |
| BAA196NC_4195 | HMPRNC0000_1317 | <i>hslV</i> |  |  |  |  |  |  |  |  |  | Primosome assembly protein PriA                                                 |
| BAA196NC_4196 | HMPRNC0000_1318 | <i>hslU</i> |  |  |  |  |  |  |  |  |  | ATP-dependent protease peptidase subunit                                        |
| BAA196NC_4197 | HMPRNC0000_1072 | <i>menA</i> |  |  |  |  |  |  |  |  |  | ATP-dependent protease ATP-binding subunit                                      |
| BAA196NC_4200 | HMPRNC0000_1366 | <i>glpF</i> |  |  |  |  |  |  |  |  |  | 1,4-dihydroxy-2-naphthoate octaprenyltransferase                                |
| BAA196NC_4201 | HMPRNC0000_1367 | <i>glpK</i> |  |  |  |  |  |  |  |  |  | Glycerol facilitator                                                            |
| BAA196NC_4208 | HMPRNC0000_0863 | <i>tpiA</i> |  |  |  |  |  |  |  |  |  | Glycerol kinase                                                                 |
| BAA196NC_4216 | HMPRNC0000_2578 | <i>yjiM</i> |  |  |  |  |  |  |  |  |  | Triosephosphate isomerase                                                       |
| BAA196NC_4218 | HMPRNC0000_1682 | <i>sodA</i> |  |  |  |  |  |  |  |  |  | Hypothetical protein                                                            |
| BAA196NC_4229 | HMPRNC0000_2729 | <i>frvX</i> |  |  |  |  |  |  |  |  |  | Superoxide dismutase, Mn                                                        |
| BAA196NC_4232 | HMPRNC0000_2501 | <i>fdhD</i> |  |  |  |  |  |  |  |  |  | Predicted endo-1,4-beta-glucanase                                               |
| BAA196NC_4259 | HMPRNC0000_1379 | <i>glnA</i> |  |  |  |  |  |  |  |  |  | Formate dehydrogenase accessory protein                                         |
| BAA196NC_4265 | HMPRNC0000_1801 | <i>yihA</i> |  |  |  |  |  |  |  |  |  | Glutamine synthetase                                                            |
| BAA196NC_4267 | HMPRNC0000_1818 | <i>polA</i> |  |  |  |  |  |  |  |  |  | GTP-binding protein                                                             |
| BAA196NC_4295 | HMPRNC0000_0398 | <i>metE</i> |  |  |  |  |  |  |  |  |  | DNA polymerase I                                                                |
|               |                 |             |  |  |  |  |  |  |  |  |  | 5-methyltetrahydropteroyltryglutamate-- homocysteine methyltransferase          |

|               |                 |             |    |    |    |    |    |    |                                                                                                            |
|---------------|-----------------|-------------|----|----|----|----|----|----|------------------------------------------------------------------------------------------------------------|
| BAA196NC_4301 | HMPRNC0000_0795 | <i>recQ</i> |    | -1 | 1  |    |    |    | ATP-dependent DNA helicase                                                                                 |
| BAA196NC_4309 | HMPRNC0000_2089 | <i>uvrD</i> |    | -1 |    |    |    |    | DNA-dependent ATPase I and helicase II                                                                     |
| BAA196NC_4318 | HMPRNC0000_1798 | <i>hemC</i> |    |    | 1  | 1  | 1  |    | Porphobilinogen deaminase                                                                                  |
| BAA196NC_4335 | HMPRNC0000_2303 | <i>rffE</i> |    |    | -1 |    |    |    | UDP-N-acetyl glucosamine-2-epimerase                                                                       |
| BAA196NC_4340 | HMPRNC0000_1193 | <i>trxA</i> | 1  |    | 1  |    |    | 1  | Thioredoxin                                                                                                |
| BAA196NC_4349 | HMPRNC0000_2231 | <i>ilvD</i> |    |    | 1  |    | 1  |    | Dihydroxy-acid dehydratase                                                                                 |
| BAA196NC_4357 | HMPRNC0000_2597 | <i>hsrA</i> |    |    |    |    |    | 1  | Predicted multidrug or homocysteine efflux system                                                          |
| BAA196NC_4359 | HMPRNC0000_0289 | <i>rbsK</i> |    | -1 |    |    |    |    | Ribokinase                                                                                                 |
| BAA196NC_4363 | HMPRNC0000_0290 | <i>rbsD</i> | -1 | -1 |    |    |    |    | Predicted cytoplasmic sugar-binding protein                                                                |
| BAA196NC_4370 | HMPRNC0000_3027 | <i>gidA</i> |    |    | 1  | 1  |    | 1  | Glucose-inhibited division protein A                                                                       |
| BAA196NC_4373 | HMPRNC0000_2301 | <i>atpB</i> |    |    | -1 |    |    |    | F0F1 ATP synthase subunit A                                                                                |
| BAA196NC_4375 | HMPRNC0000_2299 | <i>atpF</i> | 1  |    | -1 |    | -1 |    | F0F1 ATP synthase subunit B                                                                                |
| BAA196NC_4377 | HMPRNC0000_2297 | <i>atpA</i> | 1  |    | -1 |    | -1 |    | F0F1 ATP synthase subunit alpha                                                                            |
| BAA196NC_4378 | HMPRNC0000_2296 | <i>atpG</i> | 1  |    |    |    |    |    | F0F1 ATP synthase subunit gamma                                                                            |
| BAA196NC_4379 | HMPRNC0000_2295 | <i>atpD</i> | 1  |    |    |    |    | -1 | F0F1 ATP synthase subunit beta                                                                             |
| BAA196NC_4380 | HMPRNC0000_2294 | <i>atpC</i> |    |    | -1 |    | -1 |    | F0F1 ATP synthase subunit epsilon                                                                          |
| BAA196NC_4381 | HMPRNC0000_0521 | <i>glmU</i> |    |    |    |    |    | 1  | Bifunctional N-acetylglucosamine-1-phosphate uridylyltransferase/glucosamine-1-phosphate acetyltransferase |
| BAA196NC_4387 | HMPRNC0000_1486 | <i>phoU</i> | 1  |    |    |    |    |    | Negative regulator of PhoR/PhoB two-component regulator                                                    |
| BAA196NC_4405 | HMPRNC0000_3029 | <i>trmE</i> |    |    | 1  | 1  | 1  | 1  | TRNA modification GTPase                                                                                   |
| BAA196NC_4478 | HMPRNC0000_2586 | .           |    |    |    |    |    | -1 | Sodium/glutamate symporter                                                                                 |
| BAA196NC_0005 | NA              | <i>yidB</i> |    |    | 1  |    |    |    | Hypothetical protein                                                                                       |
| BAA196NC_0017 | NA              | <i>ibpA</i> | 1  |    | 1  |    |    |    | Heat shock chaperone                                                                                       |
| BAA196NC_0018 | NA              | <i>ibpB</i> |    |    | 1  |    |    |    | Heat shock chaperone                                                                                       |
| BAA196NC_0034 | NA              | <i>uhpA</i> |    |    | -1 |    |    |    | DNA-binding response regulator in two-component regulatory system with UhpB                                |
| BAA196NC_0055 | NA              | <i>rpoZ</i> |    |    | 1  |    |    |    | DNA-directed RNA polymerase subunit omega                                                                  |
| BAA196NC_0060 | NA              | <i>yicC</i> |    | -1 |    | 1  |    |    | Hypothetical protein                                                                                       |
| BAA196NC_0067 | NA              | <i>rpmB</i> |    | -1 | -1 |    |    |    | 50S ribosomal protein L28                                                                                  |
| BAA196NC_0077 | NA              | .           |    |    |    |    |    | -1 | Lipopolysaccharide 1,6-galactosyltransferase                                                               |
| BAA196NC_0090 | NA              | <i>tdh</i>  | 1  | 1  | 1  |    |    |    | L-threonine 3-dehydrogenase                                                                                |
| BAA196NC_0106 | NA              | <i>mtlR</i> |    | -1 |    |    |    |    | DNA-binding repressor                                                                                      |
| BAA196NC_0139 | NA              | <i>bax</i>  |    |    |    |    |    | 1  | Hypothetical protein                                                                                       |
| BAA196NC_0155 | NA              | <i>cspA</i> | -1 | -1 | -1 | -1 | -1 | -1 | Major cold shock protein                                                                                   |
| BAA196NC_0156 | NA              | <i>yiaG</i> |    |    |    |    |    | 1  | Predicted transcriptional regulator                                                                        |
| BAA196NC_0157 | NA              | <i>yiaF</i> |    | -1 |    |    |    | 1  | Hypothetical protein                                                                                       |
| BAA196NC_0164 | NA              | <i>yhjX</i> |    |    |    |    | -1 |    | Predicted transporter                                                                                      |
| BAA196NC_0188 | NA              | <i>kdgK</i> |    |    |    |    |    | 1  | Ketodeoxygluconokinase                                                                                     |
| BAA196NC_0198 | NA              | <i>gadX</i> |    | -1 |    |    |    | 1  | DNA-binding transcriptional dual regulator                                                                 |
| BAA196NC_0201 | NA              | <i>gadW</i> |    | -1 |    |    |    |    | DNA-binding transcriptional activator                                                                      |
| BAA196NC_0203 | NA              | <i>mdtE</i> | 1  |    | -1 |    |    |    | Multidrug resistance efflux transporter                                                                    |
| BAA196NC_0205 | NA              | <i>gadE</i> |    |    |    |    |    | 1  | DNA-binding transcriptional activator                                                                      |
| BAA196NC_0206 | NA              | <i>hdeD</i> |    |    |    |    |    | 1  | Acid-resistance membrane protein                                                                           |
| BAA196NC_0208 | NA              | <i>hdeB</i> |    | -1 |    |    |    | 1  | Acid-resistance protein                                                                                    |
| BAA196NC_0209 | NA              | <i>yhiD</i> |    | -1 |    |    |    |    | Predicted Mg(2+) transport ATPase inner membrane protein                                                   |
| BAA196NC_0211 | NA              | <i>slp</i>  |    |    |    |    |    | 1  | Outer membrane lipoprotein                                                                                 |
| BAA196NC_0217 | NA              | <i>gorA</i> |    |    | 1  |    |    |    | Glutathione reductase                                                                                      |
| BAA196NC_0223 | NA              | <i>yhiO</i> |    |    |    |    |    | 1  | Universal stress protein UspB                                                                              |
| BAA196NC_0226 | NA              | <i>yhiM</i> |    |    |    |    |    | 1  | Conserved inner membrane protein                                                                           |
| BAA196NC_0257 | NA              | <i>rpoH</i> |    |    | 1  |    |    | 1  | RNA polymerase sigma factor                                                                                |
| BAA196NC_0281 | NA              | <i>yhhW</i> | 1  | 1  | 1  | 1  | 1  | 1  | Quercetin 2,3-dioxygenase                                                                                  |
| BAA196NC_0282 | NA              | <i>gntR</i> |    |    | 1  |    |    |    | DNA-binding transcriptional repressor                                                                      |
| BAA196NC_0290 | NA              | <i>glgA</i> |    |    |    |    |    | -1 | Glycogen synthase                                                                                          |
| BAA196NC_0302 | NA              | <i>malQ</i> |    |    |    |    |    | -1 | 4-alpha-glucanotransferase (amylomaltase)                                                                  |
| BAA196NC_0322 | NA              | <i>nudE</i> |    |    |    |    |    | 1  | ADP-ribose diphosphatase                                                                                   |
| BAA196NC_0329 | NA              | <i>aroK</i> |    |    |    |    |    | 1  | Shikimate kinase I                                                                                         |
| BAA196NC_0358 | NA              | <i>fic</i>  |    |    |    |    |    | -1 | Stationary-phase protein, cell division                                                                    |
| BAA196NC_0363 | NA              | <i>yhfA</i> |    |    |    |    |    | 1  | Hypothetical protein                                                                                       |
| BAA196NC_0381 | NA              | <i>tufA</i> |    |    | -1 |    |    |    | Protein chain elongation factor EF-Tu (duplicate of tufB)                                                  |
| BAA196NC_0384 | NA              | <i>bfr</i>  |    | -1 | -1 | -1 |    |    | Bacterioferritin, iron storage and detoxification protein                                                  |
| BAA196NC_0427 | NA              | <i>yhdN</i> |    |    |    |    |    | 1  | Hypothetical protein                                                                                       |
| BAA196NC_0429 | NA              | <i>yhdL</i> |    |    |    |    |    | 1  | Hypothetical protein                                                                                       |
| BAA196NC_0454 | NA              | <i>dusB</i> | -1 |    |    |    |    | -1 | tRNA-dihydrouridine synthase B                                                                             |
| BAA196NC_0464 | NA              | <i>mreC</i> |    |    |    |    |    | -1 | Cell wall structural complex MreBCD transmembrane component MreC                                           |
| BAA196NC_0474 | NA              | <i>yhcO</i> |    | -1 |    |    |    |    | Predicted barnase inhibitor                                                                                |
| BAA196NC_0475 | NA              | <i>yhcN</i> |    |    |    |    |    | 1  | Hypothetical protein                                                                                       |
| BAA196NC_0514 | NA              | <i>kdsC</i> |    |    |    |    |    | -1 | 3-deoxy-D-manno-octulosonate 8-phosphate phosphatase                                                       |
| BAA196NC_0519 | NA              | <i>yrbD</i> |    |    | 1  |    |    |    | Predicted ABC-type organic solvent transporter                                                             |
| BAA196NC_0523 | NA              | <i>murA</i> |    |    |    |    |    | 1  | UDP-N-acetylglucosamine 1-carboxyvinyltransferase                                                          |
| BAA196NC_0528 | NA              | <i>yhbE</i> |    |    |    |    |    | 1  | Conserved inner membrane protein                                                                           |
| BAA196NC_0532 | NA              | <i>greA</i> |    |    |    |    |    | 1  | Transcription elongation factor GreA                                                                       |
| BAA196NC_0538 | NA              | <i>secG</i> |    |    |    |    |    | 1  | Protein-export membrane protein                                                                            |
| BAA196NC_0547 | NA              | <i>rpsO</i> |    |    | 1  |    |    |    | 30S ribosomal protein S15                                                                                  |
| BAA196NC_0550 | NA              | <i>deaD</i> |    |    |    |    |    | -1 | ATP-dependent RNA helicase                                                                                 |
| BAA196NC_0558 | NA              | <i>yhbP</i> |    |    |    |    |    | 1  | Hypothetical protein                                                                                       |
| BAA196NC_0582 | NA              | <i>yhaV</i> |    | -1 |    | -1 |    |    | Hypothetical protein                                                                                       |
| BAA196NC_0589 | NA              | <i>yhaC</i> |    |    |    |    |    | -1 | Uncharacterized protein                                                                                    |
| BAA196NC_0593 | NA              | <i>tdcA</i> |    |    |    |    |    | -1 | DNA-binding transcriptional activator                                                                      |
| BAA196NC_0595 | NA              | <i>tdcC</i> |    |    |    |    |    | -1 | L-threonine/L-serine transporter                                                                           |

|               |    |             |    |    |    |                                                                                  |
|---------------|----|-------------|----|----|----|----------------------------------------------------------------------------------|
| BAA196NC_0596 | NA | <i>tdcD</i> |    | -1 | -1 | Propionate kinase/acetate kinase C, anaerobic                                    |
| BAA196NC_0597 | NA | <i>tdcE</i> |    | -1 | -1 | Pyruvate formate-lyase 4/2-ketobutyrate formate-lyase                            |
| BAA196NC_0598 | NA | <i>tdcF</i> |    |    | -1 | Predicted L-PSP (mRNA) endoribonuclease                                          |
| BAA196NC_0601 | NA | <i>yhaM</i> |    | 1  | -1 | Hypothetical protein                                                             |
| BAA196NC_0608 | NA | <i>yqjF</i> | 1  |    | 1  | Predicted quinol oxidase subunit                                                 |
| BAA196NC_0610 | NA | <i>yqjE</i> |    | 1  |    | Conserved inner membrane protein                                                 |
| BAA196NC_0623 | NA | <i>yqjR</i> |    | -1 | -1 | Predicted NAD(P)-binding dehydrogenase                                           |
| BAA196NC_0629 | NA | <i>fadH</i> |    | -1 | -1 | 2,4-dienoyl-CoA reductase, NADH and FMN-linked                                   |
| BAA196NC_0643 | NA | <i>rpoD</i> | 1  | 1  |    | RNA polymerase sigma factor                                                      |
| BAA196NC_0644 | NA | <i>dnaG</i> |    |    | 1  | DNA primase                                                                      |
| BAA196NC_0645 | NA | <i>rpsU</i> |    | -1 | 1  | 30S ribosomal protein S21                                                        |
| BAA196NC_0664 | NA | <i>glgS</i> |    | -1 |    | Glycogen synthesis protein GlgS                                                  |
| BAA196NC_0671 | NA | <i>yqiC</i> |    | -1 | -1 | Hypothetical protein                                                             |
| BAA196NC_0675 | NA | <i>zupT</i> |    | 1  | 1  | Predicted dioxygenase                                                            |
| BAA196NC_0684 | NA | <i>ygiN</i> |    | -1 |    | Quinol monoxygenase                                                              |
| BAA196NC_0689 | NA | <i>ygiV</i> |    |    | 1  | Predicted transcriptional regulator                                              |
| BAA196NC_0700 | NA | <i>yqhD</i> | 1  | 1  |    | Alcohol dehydrogenase, NAD(P)-dependent                                          |
| BAA196NC_0704 | NA | <i>exbB</i> |    |    | 1  | Membrane spanning protein in TonB-ExbB-ExbD complex                              |
| BAA196NC_0708 | NA | <i>yghZ</i> |    |    | -1 | Aldo-keto reductase                                                              |
| BAA196NC_0713 | NA | <i>hybO</i> |    |    | -1 | Hydrogenase 2, small subunit                                                     |
| BAA196NC_0714 | NA | <i>hybA</i> |    |    | -1 | Hydrogenase 2 4Fe-4S ferredoxin-type component                                   |
| BAA196NC_0716 | NA | <i>hybC</i> |    |    | -1 | Hydrogenase 2, large subunit                                                     |
| BAA196NC_0732 | NA | <i>glcD</i> | 1  |    |    | Glycolate oxidase subunit, FAD-linked                                            |
| BAA196NC_0733 | NA | <i>glcE</i> | 1  | 1  |    | Glycolate oxidase FAD binding subunit                                            |
| BAA196NC_0734 | NA | <i>glcF</i> | 1  | 1  |    | Glycolate oxidase iron-sulfur subunit                                            |
| BAA196NC_0735 | NA | <i>glcG</i> | 1  |    |    | Hypothetical protein                                                             |
| BAA196NC_0736 | NA | <i>glcB</i> | 1  | 1  |    | Malate synthase                                                                  |
| BAA196NC_0746 | NA | <i>nupG</i> |    |    | 1  | Nucleoside transporter                                                           |
| BAA196NC_0751 | NA | <i>yggL</i> |    | -1 |    | Hypothetical protein                                                             |
| BAA196NC_0753 | NA | <i>ansB</i> |    | -1 | -1 | Periplasmic L-asparaginase II                                                    |
| BAA196NC_0762 | NA | <i>yqgE</i> |    |    | 1  | Hypothetical protein                                                             |
| BAA196NC_0774 | NA | <i>tktA</i> | 1  |    |    | Transketolase 1, thiamin-binding                                                 |
| BAA196NC_0784 | NA | <i>mscS</i> |    |    | 1  | Mechanosensitive channel                                                         |
| BAA196NC_0786 | NA | <i>yggE</i> | 1  |    | 1  | Hypothetical protein                                                             |
| BAA196NC_0798 | NA | <i>gcvH</i> | 1  | 1  | 1  | Glycine cleavage system protein H                                                |
| BAA196NC_0801 | NA | <i>pepP</i> |    |    | -1 | Proline aminopeptidase P II                                                      |
| BAA196NC_0802 | NA | <i>ubiH</i> | 1  |    |    | 2-octaprenyl-6-methoxyphenyl hydroxylase                                         |
| BAA196NC_0803 | NA | <i>visC</i> |    |    | -1 | Hypothetical protein                                                             |
| BAA196NC_0807 | NA | <i>yjff</i> |    |    | -1 | Predicted NAD(P)-binding oxidoreductase with NAD(P)-binding Rossmann-fold domain |
| BAA196NC_0811 | NA | <i>yjzZ</i> |    | 1  | 1  | Putative global regulator                                                        |
| BAA196NC_0839 | NA | <i>ygeV</i> |    |    | -1 | Predicted DNA-binding transcriptional regulator                                  |
| BAA196NC_0876 | NA | <i>ygdR</i> |    | -1 | -1 | Hypothetical protein                                                             |
| BAA196NC_0889 | NA | <i>recC</i> |    |    | -1 | Exonuclease V (RecBCD complex), gamma chain                                      |
| BAA196NC_0890 | NA | <i>ptr</i>  |    |    | 1  | Protease III                                                                     |
| BAA196NC_0899 | NA | <i>ygdI</i> |    | -1 | 1  | Hypothetical protein                                                             |
| BAA196NC_0900 | NA | <i>fucK</i> |    | -1 |    | L-fuculokinase                                                                   |
| BAA196NC_0913 | NA | <i>sdaC</i> |    |    | 1  | Predicted serine transporter                                                     |
| BAA196NC_0914 | NA | <i>ygdH</i> |    |    | -1 | Hypothetical protein                                                             |
| BAA196NC_0927 | NA | <i>chpR</i> |    |    | 1  | Antitoxin of the ChpA-ChpR toxin-antitoxin system                                |
| BAA196NC_0959 | NA | <i>cysD</i> |    | 1  |    | Sulfate adenyllyltransferase subunit 2                                           |
| BAA196NC_0966 | NA | <i>truD</i> | 1  |    |    | tRNA pseudouridine synthase D                                                    |
| BAA196NC_0969 | NA | <i>nlpD</i> | 1  | 1  |    | Predicted outer membrane lipoprotein                                             |
| BAA196NC_0970 | NA | <i>rpoS</i> | 1  |    | 1  | RNA polymerase sigma factor                                                      |
| BAA196NC_0983 | NA | <i>hypD</i> |    |    | -1 | Protein required for maturation of hydrogenases                                  |
| BAA196NC_0985 | NA | <i>hypB</i> |    |    | -1 | GTP hydrolase involved in nickel liganding into hydrogenases                     |
| BAA196NC_1004 | NA | <i>norR</i> |    |    | 1  | Anaerobic nitric oxide reductase transcription regulator                         |
| BAA196NC_1017 | NA | <i>csrA</i> |    | -1 | -1 | Carbon storage regulator                                                         |
| BAA196NC_1031 | NA | <i>proX</i> | 1  |    |    | Glycine betaine transporter subunit                                              |
| BAA196NC_1040 | NA | <i>ygaW</i> |    |    | 1  | Predicted inner membrane protein                                                 |
| BAA196NC_1044 | NA | <i>yqaE</i> |    |    | 1  | Predicted membrane protein                                                       |
| BAA196NC_1046 | NA | <i>csiR</i> |    |    | 1  | DNA-binding transcriptional dual regulator                                       |
| BAA196NC_1049 | NA | <i>gabD</i> |    |    | -1 | Succinate-semialdehyde dehydrogenase I, NADP-dependent                           |
| BAA196NC_1051 | NA | <i>ygaT</i> | 1  |    |    | Hypothetical protein                                                             |
| BAA196NC_1082 | NA | <i>yjff</i> | -1 | -1 |    | Uncharacterized protein                                                          |
| BAA196NC_1104 | NA | <i>pheA</i> |    |    | 1  | Fused chorismate mutase P/prephenate dehydratase                                 |
| BAA196NC_1105 | NA | <i>yfiA</i> |    | -1 | -1 | Cold shock protein associated with 30S ribosomal subunit                         |
| BAA196NC_1113 | NA | <i>yfiQ</i> |    |    | -1 | Fused predicted acyl-CoA synthetase: NAD(P)-binding subunit/ATP-binding subunit  |
| BAA196NC_1115 | NA | <i>trxC</i> |    |    | 1  | Thioredoxin 2                                                                    |
| BAA196NC_1118 | NA | <i>yfiD</i> | -1 | -1 | -1 | Pyruvate formate lyase subunit                                                   |
| BAA196NC_1124 | NA | <i>rpoE</i> |    |    | 1  | RNA polymerase, sigma 24 (sigma E) factor                                        |
| BAA196NC_1126 | NA | <i>rseB</i> |    | 1  |    | Periplasmic negative regulator of sigmaE                                         |
| BAA196NC_1133 | NA | <i>pdxI</i> |    |    | 1  | Pyridoxal phosphate biosynthetic protein                                         |
| BAA196NC_1137 | NA | <i>yfhB</i> |    |    | 1  | Hypothetical protein                                                             |
| BAA196NC_1141 | NA | <i>purl</i> |    | -1 |    | Phosphoribosylformylglycinamide synthase                                         |
| BAA196NC_1145 | NA | <i>glnB</i> |    |    | 1  | Regulatory protein P-II for glutamine synthetase                                 |
| BAA196NC_1168 | NA | <i>iscS</i> | 1  | 1  |    | Cysteine desulfurase                                                             |
| BAA196NC_1175 | NA | <i>pepB</i> |    | 1  |    | Aminopeptidase B                                                                 |
| BAA196NC_1223 | NA | <i>nlpB</i> | 1  |    |    | Lipoprotein                                                                      |

|               |    |             |    |    |    |                                                                                       |
|---------------|----|-------------|----|----|----|---------------------------------------------------------------------------------------|
| BAA196NC_1237 | NA | <i>talA</i> | 1  |    |    | Transaldolase A                                                                       |
| BAA196NC_1238 | NA | <i>maeB</i> | 1  | 1  |    | Malic enzyme                                                                          |
| BAA196NC_1261 | NA | <i>eutC</i> |    |    | -1 | Ethanolamine ammonia-lyase small subunit                                              |
| BAA196NC_1275 | NA | <i>ucpA</i> |    | -1 | -1 | Short chain dehydrogenase                                                             |
| BAA196NC_1300 | NA | <i>yfeC</i> |    |    | -1 | Predicted DNA-binding transcriptional regulator                                       |
| BAA196NC_1318 | NA | <i>yfdY</i> |    |    | 1  | Predicted inner membrane protein                                                      |
| BAA196NC_1325 | NA | <i>evgS</i> | -1 |    | -1 | Hybrid sensory histidine kinase in two-component regulatory system with EvgA          |
| BAA196NC_1351 | NA | <i>yfcZ</i> | -1 |    | -1 | Hypothetical protein                                                                  |
| BAA196NC_1352 | NA | <i>yfcY</i> |    |    | -1 | Acetyl-CoA acetyltransferase                                                          |
| BAA196NC_1354 | NA | <i>sixA</i> |    |    | 1  | Phosphohistidine phosphatase                                                          |
| BAA196NC_1364 | NA | <i>yfcN</i> | -1 |    |    | Hypothetical protein                                                                  |
| BAA196NC_1372 | NA | <i>fabB</i> |    |    | 1  | 3-oxoacyl-(acyl carrier protein) synthase                                             |
| BAA196NC_1375 | NA | <i>flk</i>  |    |    | -1 | Predicted flagella assembly protein                                                   |
| BAA196NC_1383 | NA | <i>cvpA</i> | 1  | 1  |    | Membrane protein required for colicin V production                                    |
| BAA196NC_1399 | NA | <i>pta</i>  |    | 1  | -1 | Phosphate acetyltransferase                                                           |
| BAA196NC_1401 | NA | <i>yfbV</i> | -1 |    | -1 | Hypothetical protein                                                                  |
| BAA196NC_1402 | NA | <i>yfbU</i> |    |    | 1  | Hypothetical protein                                                                  |
| BAA196NC_1404 | NA | <i>yfbS</i> |    |    | -1 | Predicted transporter                                                                 |
| BAA196NC_1407 | NA | <i>irhA</i> | -1 |    | 1  | DNA-binding transcriptional repressor of flagellar, motility and chemotaxis genes     |
| BAA196NC_1411 | NA | <i>nuoC</i> |    |    | -1 | NADH:ubiquinone oxidoreductase, chain C,D                                             |
| BAA196NC_1412 | NA | <i>nuoE</i> |    |    | -1 | NADH dehydrogenase subunit E                                                          |
| BAA196NC_1414 | NA | <i>nuoG</i> |    |    | -1 | NADH dehydrogenase subunit G                                                          |
| BAA196NC_1431 | NA | <i>elaB</i> | -1 | -1 | -1 | Hypothetical protein                                                                  |
| BAA196NC_1432 | NA | <i>menF</i> |    |    | -1 | Menaquinone-specific isochorismate synthase                                           |
| BAA196NC_1437 | NA | <i>menE</i> |    |    | -1 | O-succinylbenzoic acid--CoA ligase                                                    |
| BAA196NC_1438 | NA | <i>pmrD</i> |    |    | -1 | Polymyxin resistance protein B                                                        |
| BAA196NC_1483 | NA | <i>rcsD</i> |    |    | -1 | Phosphotransfer intermediate protein in two-component regulatory system with RcsBC    |
| BAA196NC_1485 | NA | <i>ompC</i> | -1 |    | -1 | Outer membrane porin protein C                                                        |
| BAA196NC_1495 | NA | <i>napA</i> |    |    | -1 | Nitrate reductase, periplasmic, large subunit                                         |
| BAA196NC_1496 | NA | <i>napG</i> |    |    | -1 | Quinol dehydrogenase periplasmic component                                            |
| BAA196NC_1499 | NA | <i>napC</i> |    |    | -1 | Nitrate reductase, cytochrome c-type, periplasmic                                     |
| BAA196NC_1524 | NA | <i>spr</i>  |    |    | 1  | Predicted peptidase, outer membrane lipoprotein                                       |
| BAA196NC_1560 | NA | <i>cdd</i>  | -1 |    |    | Cytidine deaminase                                                                    |
| BAA196NC_1575 | NA | <i>yehX</i> |    |    | -1 | Predicted transporter subunit: ATP-binding component of ABC superfamily               |
| BAA196NC_1609 | NA | <i>gatZ</i> | -1 |    | -1 | D-tagatose 1,6-bisphosphate aldolase 2, subunit                                       |
| BAA196NC_1634 | NA | <i>yegK</i> |    |    | 1  | Uncharacterized protein                                                               |
| BAA196NC_1635 | NA | <i>yegJ</i> |    |    | 1  | Uncharacterized protein                                                               |
| BAA196NC_1667 | NA | <i>galF</i> |    |    | 1  | Predicted subunit with GalU                                                           |
| BAA196NC_1669 | NA | <i>rfbD</i> | -1 |    |    | DTDP-4-dehydrorhamnose reductase subunit, NAD(P)-binding, of dTDP-L-rhamnose synthase |
| BAA196NC_1702 | NA | <i>yeeX</i> |    |    | -1 | Hypothetical protein                                                                  |
| BAA196NC_1709 | NA | <i>flu</i>  |    |    | -1 | CP4-44 prophage; antigen 43 (Ag43) phase-variable biofilm formation autotransporter   |
| BAA196NC_1733 | NA | <i>yedY</i> |    |    | 1  | Hypothetical protein                                                                  |
| BAA196NC_1745 | NA | <i>yodC</i> |    |    | 1  | Hypothetical protein                                                                  |
| BAA196NC_1749 | NA | <i>yodD</i> | -1 |    | -1 | Hypothetical protein                                                                  |
| BAA196NC_1750 | NA | <i>dsrB</i> | -1 |    | -1 | Hypothetical protein                                                                  |
| BAA196NC_1791 | NA | <i>yecH</i> | -1 |    | 1  | Hypothetical protein                                                                  |
| BAA196NC_1821 | NA | <i>cutC</i> | -1 |    | -1 | Copper homeostasis protein                                                            |
| BAA196NC_1824 | NA | <i>yecP</i> |    |    | -1 | Predicted S-adenosyl-L-methionine-dependent methyltransferase                         |
| BAA196NC_1826 | NA | <i>yecN</i> | -1 |    |    | Predicted inner membrane protein                                                      |
| BAA196NC_1827 | NA | <i>yecE</i> |    |    | -1 | Hypothetical protein                                                                  |
| BAA196NC_1830 | NA | <i>nudB</i> |    |    | 1  | DATP pyrophosphohydrolase                                                             |
| BAA196NC_1832 | NA | <i>ruvC</i> |    |    | 1  | Holliday junction resolvase                                                           |
| BAA196NC_1847 | NA | <i>purT</i> |    |    | 1  | Phosphoribosylglycinamide formyltransferase 2                                         |
| BAA196NC_1848 | NA | <i>yebG</i> |    |    | -1 | Conserved protein regulated by LexA                                                   |
| BAA196NC_1850 | NA | <i>yebE</i> |    |    | 1  | Hypothetical protein                                                                  |
| BAA196NC_1862 | NA | <i>yebV</i> | -1 |    |    | Hypothetical protein                                                                  |
| BAA196NC_1869 | NA | <i>htpX</i> | 1  | 1  | 1  | Heat shock protein HtpX                                                               |
| BAA196NC_1875 | NA | <i>yobF</i> | -1 | -1 | -1 | Hypothetical protein                                                                  |
| BAA196NC_1876 | NA | <i>cspC</i> | -1 |    | -1 | Stress protein, member of the CspA-family                                             |
| BAA196NC_1882 | NA | <i>manX</i> |    |    | -1 | Fused mannose-specific PTS enzymes: IIA component/IIIB component                      |
| BAA196NC_1886 | NA | <i>sdaA</i> |    |    | -1 | L-serine deaminase I                                                                  |
| BAA196NC_1890 | NA | <i>yaaC</i> | -1 |    | -1 | Hypothetical protein                                                                  |
| BAA196NC_1893 | NA | <i>yaaZ</i> |    |    | -1 | Predicted peptidase                                                                   |
| BAA196NC_1895 | NA | <i>fadD</i> |    |    | -1 | Acyl-CoA synthase                                                                     |
| BAA196NC_1896 | NA | <i>rmd</i>  |    |    | 1  | Ribonuclease D                                                                        |
| BAA196NC_1905 | NA | <i>yaaQ</i> |    |    | 1  | Conserved inner membrane protein                                                      |
| BAA196NC_1913 | NA | <i>yaaJ</i> |    |    | 1  | Predicted diguanylate cyclase                                                         |
| BAA196NC_1915 | NA | <i>yaaH</i> |    |    | -1 | Hypothetical protein                                                                  |
| BAA196NC_1916 | NA | <i>yaaG</i> |    |    | -1 | Conserved protein with nucleoside triphosphate hydrolase domain                       |
| BAA196NC_1917 | NA | <i>mipA</i> | 1  | 1  |    | Scaffolding protein for murein synthesizing machinery                                 |
| BAA196NC_1953 | NA | <i>astA</i> |    |    | -1 | Arginine succinyltransferase                                                          |
| BAA196NC_1954 | NA | <i>astD</i> |    |    | -1 | Succinylglutamic semialdehyde dehydrogenase                                           |
| BAA196NC_1955 | NA | <i>astB</i> |    |    | -1 | Succinylarginine dihydrolase                                                          |
| BAA196NC_1956 | NA | <i>astE</i> |    |    | -1 | Succinylglutamate desuccinylase                                                       |



|               |    |              |    |    |    |    |                                                              |                                                                                                                |
|---------------|----|--------------|----|----|----|----|--------------------------------------------------------------|----------------------------------------------------------------------------------------------------------------|
| BAA196NC_1962 | NA | <i>chbB</i>  | -1 | -1 |    |    | N,N'-diacetylchitobiose-specific enzyme IIB component of PTS |                                                                                                                |
| BAA196NC_1971 | NA | <i>ydjN</i>  |    |    | 1  |    | Predicted transporter                                        |                                                                                                                |
| BAA196NC_1974 | NA | <i>yniB</i>  | -1 |    |    |    | Predicted inner membrane protein                             |                                                                                                                |
| BAA196NC_1976 | NA | <i>ydjZ</i>  | 1  |    |    | 1  | Hypothetical protein                                         |                                                                                                                |
| BAA196NC_1986 | NA | <i>ihfA</i>  | -1 | -1 |    |    | Integration host factor subunit alpha                        |                                                                                                                |
| BAA196NC_1989 | NA | <i>btuD</i>  |    |    |    | -1 | Vitamin B12-transporter ATPase                               |                                                                                                                |
| BAA196NC_1997 | NA | <i>pps</i>   | 1  | 1  | 1  |    | Phosphoenolpyruvate synthase                                 |                                                                                                                |
| BAA196NC_2021 | NA | <i>sufD</i>  |    |    |    | -1 | Component of SufBCD complex                                  |                                                                                                                |
| BAA196NC_2025 | NA | <i>lpp</i>   | -1 | -1 | -1 | 1  | -1                                                           | Murein lipoprotein                                                                                             |
| BAA196NC_2027 | NA | <i>fumD</i>  | -1 | -1 |    |    | Fumarase D                                                   |                                                                                                                |
| BAA196NC_2043 | NA | <i>purR</i>  |    |    |    | 1  | DNA-binding transcriptional repressor, hypoxanthine-binding  |                                                                                                                |
| BAA196NC_2053 | NA | <i>ydhM</i>  |    |    |    |    | 1                                                            | Predicted DNA-binding transcriptional regulator                                                                |
| BAA196NC_2061 | NA | <i>slyB</i>  |    |    | 1  | 1  | Outer membrane lipoprotein                                   |                                                                                                                |
| BAA196NC_2084 | NA | <i>hadA</i>  |    |    |    |    | 1                                                            | 7-alpha-hydroxysteroid dehydrogenase                                                                           |
| BAA196NC_2085 | NA | <i>uidR</i>  |    |    |    |    | -1                                                           | DNA-binding transcriptional repressor                                                                          |
| BAA196NC_2100 | NA | <i>pntA</i>  | 1  |    |    |    |                                                              | NAD(P) transhydrogenase subunit alpha                                                                          |
| BAA196NC_2101 | NA | <i>pntB</i>  | 1  |    |    |    |                                                              | Pyridine nucleotide transhydrogenase                                                                           |
| BAA196NC_2105 | NA | <i>ydgD</i>  |    |    |    |    | 1                                                            | Predicted peptidase                                                                                            |
| BAA196NC_2118 | NA | <i>ynfC</i>  | -1 |    |    |    |                                                              | Hypothetical protein                                                                                           |
| BAA196NC_2139 | NA | <i>relB</i>  |    |    |    |    | 1                                                            | Qin prophage; bifunctional antitoxin of the RelE-RelB toxin-antitoxin system/<br>transcriptional repressor     |
| BAA196NC_2141 | NA | <i>hokD</i>  |    |    |    |    | 1                                                            | Qin prophage; small toxic polypeptide                                                                          |
| BAA196NC_2146 | NA | <i>cspB</i>  |    |    |    |    | -1                                                           | Qin prophage; cold shock protein                                                                               |
| BAA196NC_2164 | NA | <i>dcp</i>   | 1  |    |    |    | 1                                                            | Dipeptidyl carboxypeptidase II                                                                                 |
| BAA196NC_2167 | NA | <i>ydeH</i>  |    |    | 1  |    |                                                              | Hypothetical protein                                                                                           |
| BAA196NC_2170 | NA | <i>marB</i>  |    | 1  |    |    |                                                              | Hypothetical protein                                                                                           |
| BAA196NC_2171 | NA | <i>marA</i>  |    |    |    |    | 1                                                            | DNA-binding transcriptional dual activator of multiple antibiotic resistance                                   |
| BAA196NC_2186 | NA | <i>lsrB</i>  |    |    | -1 | -1 |                                                              | AI2 transporter                                                                                                |
| BAA196NC_2188 | NA | <i>lsrC</i>  | -1 | -1 |    |    |                                                              | AI2 transporter                                                                                                |
| BAA196NC_2189 | NA | <i>lsrA</i>  |    | -1 | -1 |    |                                                              | Fused AI2 transporter subunits of ABC superfamily: ATP-binding components                                      |
| BAA196NC_2211 | NA | <i>yddV</i>  |    |    | -1 |    |                                                              | Predicted diguanylate cyclase                                                                                  |
| BAA196NC_2221 | NA | <i>sra</i>   | -1 | -1 |    |    |                                                              | 30S ribosomal subunit protein S22                                                                              |
| BAA196NC_2233 | NA | <i>narZ</i>  |    |    |    |    | -1                                                           | Nitrate reductase 2 (NRZ), alpha subunit                                                                       |
| BAA196NC_2234 | NA | <i>narY</i>  |    |    |    |    | -1                                                           | Nitrate reductase 2 (NRZ), beta subunit                                                                        |
| BAA196NC_2250 | NA | <i>yncE</i>  |    |    | 1  |    |                                                              | Hypothetical protein                                                                                           |
| BAA196NC_2261 | NA | <i>ydcT</i>  |    |    |    |    | -1                                                           | Predicted spermidine/putrescine transporter subunit                                                            |
| BAA196NC_2262 | NA | <i>ydcS</i>  |    |    |    |    | -1                                                           | Predicted spermidine/putrescine transporter subunit                                                            |
| BAA196NC_2266 | NA | <i>tehB</i>  | 1  | 1  | 1  |    |                                                              | Putative S-adenosyl-L-methionine-dependent methyltransferase                                                   |
| BAA196NC_2277 | NA | <i>ydchH</i> | -1 |    |    |    | -1                                                           | Hypothetical protein                                                                                           |
| BAA196NC_2279 | NA | <i>ydcl</i>  |    |    | -1 |    |                                                              | Hypothetical protein                                                                                           |
| BAA196NC_2287 | NA | <i>ydbD</i>  | -1 |    |    |    | -1                                                           | Uncharacterized protein                                                                                        |
| BAA196NC_2325 | NA | <i>hslJ</i>  |    |    | -1 |    |                                                              | Heat-inducible protein                                                                                         |
| BAA196NC_2326 | NA | <i>ydbJ</i>  | -1 |    |    |    |                                                              | Hypothetical protein                                                                                           |
| BAA196NC_2328 | NA | <i>ydbK</i>  |    | 1  |    |    |                                                              | Fused predicted pyruvate-flavodoxin oxidoreductase: conserved<br>protein/conserved protein/FeS binding protein |
| BAA196NC_2331 | NA | <i>uspF</i>  |    |    | -1 | 1  |                                                              | Stress-induced protein, ATP-binding protein                                                                    |
| BAA196NC_2355 | NA | <i>dbpA</i>  |    |    |    |    | -1                                                           | ATP-dependent RNA helicase, specific for 23S rRNA                                                              |
| BAA196NC_2359 | NA | <i>ycjY</i>  |    |    | 1  |    |                                                              | Putative hydrolase                                                                                             |
| BAA196NC_2365 | NA | <i>fnr</i>   |    |    |    |    | 1                                                            | DNA-binding transcriptional dual regulator, global regulator of anaerobic growth                               |
| BAA196NC_2392 | NA | <i>pspE</i>  |    | 1  |    |    |                                                              | Thiosulfate:cyanide sulfurtransferase (rhodanese)                                                              |
| BAA196NC_2415 | NA | <i>gmr</i>   |    |    |    |    | 1                                                            | Modulator of Rnase II stability                                                                                |
| BAA196NC_2418 | NA | <i>osmB</i>  | -1 |    | -1 |    |                                                              | Lipoprotein                                                                                                    |
| BAA196NC_2424 | NA | <i>ribA</i>  | -1 |    | 1  |    |                                                              | GTP cyclohydrolase II protein                                                                                  |
| BAA196NC_2429 | NA | <i>yciN</i>  | -1 |    |    |    |                                                              | Hypothetical protein                                                                                           |
| BAA196NC_2442 | NA | <i>yciG</i>  | -1 |    |    |    |                                                              | Hypothetical protein                                                                                           |
| BAA196NC_2443 | NA | <i>yciF</i>  |    |    |    |    | 1                                                            | Hypothetical protein                                                                                           |
| BAA196NC_2444 | NA | <i>yciE</i>  |    |    |    |    | 1                                                            | Hypothetical protein                                                                                           |
| BAA196NC_2445 | NA | <i>ompW</i>  |    |    |    |    | -1                                                           | Outer membrane protein W                                                                                       |
| BAA196NC_2464 | NA | <i>hns</i>   | -1 | -1 |    |    |                                                              | Global DNA-binding transcriptional dual regulator H-NS                                                         |
| BAA196NC_2465 | NA | <i>galU</i>  |    |    |    |    | 1                                                            | Glucose-1-phosphate uridylyltransferase                                                                        |
| BAA196NC_2467 | NA | <i>rssA</i>  | -1 |    |    |    | 1                                                            | Hypothetical protein                                                                                           |
| BAA196NC_2477 | NA | <i>narX</i>  |    |    |    |    | 1                                                            | Sensory histidine kinase in two-component regulatory system with NarL                                          |
| BAA196NC_2500 | NA | <i>ychH</i>  | -1 | -1 | -1 |    |                                                              | Predicted inner membrane protein                                                                               |
| BAA196NC_2512 | NA | <i>ymgE</i>  |    |    |    |    | 1                                                            | Predicted inner membrane protein                                                                               |
| BAA196NC_2518 | NA | <i>dadX</i>  | 1  | 1  |    |    |                                                              |                                                                                                                |
| BAA196NC_2529 | NA | <i>ycgI</i>  |    |    |    |    | 1                                                            | Hypothetical protein                                                                                           |
| BAA196NC_2569 | NA | <i>hflD</i>  | -1 |    |    |    | -1                                                           | Hypothetical protein                                                                                           |
| BAA196NC_2576 | NA | <i>ycfP</i>  |    |    | 1  | 1  |                                                              | Probably esterase of a salvage cluster                                                                         |
| BAA196NC_2580 | NA | <i>potD</i>  | 1  |    |    |    |                                                              | Spermidine/putrescine ABC transporter periplasmic substrate-binding protein                                    |
| BAA196NC_2591 | NA | <i>ycfR</i>  |    |    | 1  | 1  | 1                                                            | Hypothetical protein                                                                                           |
| BAA196NC_2642 | NA | <i>pyrC</i>  | 1  | 1  |    |    |                                                              | Dihydroorotase                                                                                                 |
| BAA196NC_2644 | NA | <i>yceP</i>  |    |    | -1 |    |                                                              | Hypothetical protein                                                                                           |
| BAA196NC_2652 | NA | <i>msyB</i>  | 1  | 1  |    | 1  |                                                              | Hypothetical protein                                                                                           |
| BAA196NC_2653 | NA | <i>yceK</i>  |    |    |    |    | 1                                                            | Predicted lipoprotein                                                                                          |
| BAA196NC_2654 | NA | <i>mdoH</i>  |    | 1  |    |    |                                                              | Glucosyltransferase MdoH                                                                                       |

|               |    |               |    |    |    |                                                                                                         |
|---------------|----|---------------|----|----|----|---------------------------------------------------------------------------------------------------------|
| BAA196NC_2687 | NA | <i>putA</i>   | 1  |    |    | Fused DNA-binding transcriptional regulator/proline dehydrogenase/pyrroline-5-carboxylate dehydrogenase |
| BAA196NC_2725 | NA | <i>hyaD</i>   | -1 | -1 |    | Protein involved in processing of HyaA and HyaB proteins                                                |
| BAA196NC_2727 | NA | <i>hyaB</i>   |    | -1 |    | Hydrogenase 1, large subunit                                                                            |
| BAA196NC_2728 | NA | <i>hyaA</i>   |    | -1 |    | Hydrogenase 1, small subunit                                                                            |
| BAA196NC_2746 | NA | <i>fabA</i>   |    | 1  |    | 3-hydroxydecanoyl-ACP dehydratase                                                                       |
| BAA196NC_2747 | NA | <i>rmf</i>    | -1 |    |    | Ribosome modulation factor                                                                              |
| BAA196NC_2748 | NA | <i>ymbA</i>   |    | 1  |    | Hypothetical protein                                                                                    |
| BAA196NC_2751 | NA | <i>uup</i>    |    | -1 |    | Fused predicted transporter subunits of ABC superfamily: ATP-binding components                         |
| BAA196NC_2753 | NA | <i>ycbX</i>   |    | -1 |    | Predicted 2Fe-2S cluster-containing protein                                                             |
| BAA196NC_2771 | NA | <i>ompF</i>   | -1 | -1 | -1 | Outer membrane porin 1a (Ia;b;F)                                                                        |
| BAA196NC_2772 | NA | <i>aspC</i>   |    | 1  |    | Aspartate aminotransferase, PLP-dependent                                                               |
| BAA196NC_2794 | NA | <i>ycaP</i>   |    | 1  |    | Conserved inner membrane protein                                                                        |
| BAA196NC_2802 | NA | <i>ycaD</i>   |    | 1  |    | Putative MFS family transporter protein                                                                 |
| BAA196NC_2803 | NA | <i>ycaC</i>   |    | 1  |    | Predicted hydrolase                                                                                     |
| BAA196NC_2804 | NA | <i>dmsC</i>   |    | -1 |    | Dimethyl sulfoxide reductase, anaerobic, subunit C                                                      |
| BAA196NC_2806 | NA | <i>dmsA</i>   |    | -1 |    | Dimethyl sulfoxide reductase, anaerobic, subunit A                                                      |
| BAA196NC_2811 | NA | <i>lrp</i>    |    | -1 |    | DNA-binding transcriptional dual regulator, leucine-binding                                             |
| BAA196NC_2819 | NA | <i>cspD</i>   | -1 |    |    | Cold shock protein homolog                                                                              |
| BAA196NC_2829 | NA | <i>ltaE</i>   | 1  | 1  |    | L-allo-threonine aldolase, PLP-dependent                                                                |
| BAA196NC_2833 | NA | <i>ybjQ</i>   |    |    | 1  | Hypothetical protein                                                                                    |
| BAA196NC_2863 | NA | <i>dacC</i>   |    | -1 |    | D-alanyl-D-alanine carboxypeptidase (penicillin-binding protein 6a)                                     |
| BAA196NC_2865 | NA | <i>ylil</i>   |    | 1  |    | Predicted dehydrogenase                                                                                 |
| BAA196NC_2866 | NA | <i>yltH</i>   |    | -1 | -1 | Hypothetical protein                                                                                    |
| BAA196NC_2883 | NA | <i>ybiS</i>   |    | 1  |    | L,D-transpeptidase ldtB                                                                                 |
| BAA196NC_2886 | NA | <i>rhlE</i>   | -1 | -1 |    | RNA helicase                                                                                            |
| BAA196NC_2888 | NA | <i>ompX</i>   | -1 |    |    | Outer membrane protein X                                                                                |
| BAA196NC_2891 | NA | <i>glnH</i>   |    | -1 |    | Glutamine ABC transporter periplasmic protein                                                           |
| BAA196NC_2892 | NA | <i>glnP</i>   | 1  |    |    | Glutamine ABC transporter permease protein                                                              |
| BAA196NC_2893 | NA | <i>glnQ</i>   | 1  | -1 |    | Glutamine ABC transporter ATP-binding protein                                                           |
| BAA196NC_2896 | NA | <i>ybiM</i>   |    |    | 1  | Hypothetical protein                                                                                    |
| BAA196NC_2897 | NA | <i>fiu</i>    |    | 1  |    | Predicted iron outer membrane transporter                                                               |
| BAA196NC_2900 | NA | <i>ybiJ</i>   |    | 1  | 1  | Hypothetical protein                                                                                    |
| BAA196NC_2907 | NA | <i>ybhG</i>   |    | -1 |    | Hypothetical protein                                                                                    |
| BAA196NC_2911 | NA | <i>ybhQ</i>   |    | 1  |    | Predicted inner membrane protein                                                                        |
| BAA196NC_2938 | NA | <i>ynfO-1</i> |    |    | 1  | Qin prophage protein                                                                                    |
| BAA196NC_2947 | NA | <i>ninH</i>   |    | -1 |    | Uncharacterized phage protein                                                                           |
| BAA196NC_2951 | NA | <i>ninB</i>   |    | -1 |    | Phage DNA recombination                                                                                 |
| BAA196NC_2975 | NA | <i>ybhl</i>   | -1 |    |    | Inner membrane protein                                                                                  |
| BAA196NC_3007 | NA | <i>galK</i>   |    | -1 |    | Galactokinase                                                                                           |
| BAA196NC_3013 | NA | <i>pnuC</i>   |    |    | 1  | Predicted nicotinamide mononucleotide transporter                                                       |
| BAA196NC_3015 | NA | <i>ybgF</i>   | -1 |    |    | Hypothetical protein                                                                                    |
| BAA196NC_3018 | NA | <i>tolA</i>   |    | 1  |    | Cell envelope integrity inner membrane protein TolA                                                     |
| BAA196NC_3024 | NA | <i>cydB</i>   |    | -1 |    | Cytochrome d terminal oxidase, subunit II                                                               |
| BAA196NC_3036 | NA | <i>sdhD</i>   |    | -1 | -1 | Succinate dehydrogenase cytochrome b556 small membrane subunit                                          |
| BAA196NC_3038 | NA | <i>gltA</i>   | 1  |    |    | Citrate synthase                                                                                        |
| BAA196NC_3058 | NA | <i>ybfA</i>   | -1 | -1 |    | Hypothetical protein                                                                                    |
| BAA196NC_3060 | NA | <i>kdpA</i>   |    |    | -1 | Potassium-transporting ATPase subunit A                                                                 |
| BAA196NC_3063 | NA | <i>kdpD</i>   |    |    | -1 | Fused sensory histidine kinase in two-component regulatory system with KdpE: signal sensing protein     |
| BAA196NC_3072 | NA | <i>seqA</i>   |    | 1  |    | Regulatory protein for replication initiation                                                           |
| BAA196NC_3075 | NA | <i>fldA</i>   | 1  | 1  |    | Flavodoxin 1                                                                                            |
| BAA196NC_3093 | NA | <i>hscC</i>   |    |    | -1 | Hsp70 family chaperone Hsc62, binds to RpoD and inhibits transcription                                  |
| BAA196NC_3117 | NA | <i>dacA</i>   |    | 1  | -1 | D-alanyl-D-alanine carboxypeptidase (penicillin-binding protein 5)                                      |
| BAA196NC_3118 | NA | <i>ybeD</i>   | -1 |    |    | Hypothetical protein                                                                                    |
| BAA196NC_3122 | NA | <i>tatE</i>   | -1 | -1 |    | Twin arginine translocase protein E                                                                     |
| BAA196NC_3128 | NA | <i>dcuC</i>   |    | -1 |    | Anaerobic C4-dicarboxylate transport                                                                    |
| BAA196NC_3142 | NA | <i>uspG</i>   |    | 1  | 1  | Universal stress protein UP12                                                                           |
| BAA196NC_3144 | NA | <i>ahpC</i>   | 1  | 1  | 1  | Alkyl hydroperoxide reductase, C22 subunit                                                              |
| BAA196NC_3152 | NA | <i>cstA</i>   | 1  |    |    | Carbon starvation protein                                                                               |
| BAA196NC_3155 | NA | <i>entB</i>   | 1  |    |    | Isochorismatase                                                                                         |
| BAA196NC_3189 | NA | <i>appY</i>   |    |    | 1  | DLP12 prophage; DNA-binding transcriptional activator                                                   |
| BAA196NC_3248 | NA | <i>allR</i>   |    | 1  | 1  | DNA-binding transcriptional repressor                                                                   |
| BAA196NC_3293 | NA | <i>ybaJ</i>   |    |    | 1  | Hypothetical protein                                                                                    |
| BAA196NC_3296 | NA | <i>ylaC</i>   |    | -1 |    | Predicted inner membrane protein                                                                        |
| BAA196NC_3297 | NA | <i>ylaB</i>   | -1 |    |    | Conserved inner membrane protein                                                                        |
| BAA196NC_3299 | NA | <i>ybaX</i>   | 1  |    | -1 | 7-cyano-7-deazaguanine synthase                                                                         |
| BAA196NC_3313 | NA | <i>ppiD</i>   |    |    | 1  | Peptidyl-prolyl cis-trans isomerase (rotamase D)                                                        |
| BAA196NC_3318 | NA | <i>tig</i>    | -1 | -1 | -1 | Trigger factor                                                                                          |
| BAA196NC_3320 | NA | <i>bolA</i>   | -1 |    |    | Regulator of penicillin binding proteins and beta lactamase transcription (morphogene)                  |
| BAA196NC_3323 | NA | <i>cyoA</i>   | 1  |    | -1 | Cytochrome o ubiquinol oxidase subunit II                                                               |
| BAA196NC_3325 | NA | <i>cyoC</i>   |    |    | -1 | Cytochrome o ubiquinol oxidase subunit III                                                              |
| BAA196NC_3326 | NA | <i>cyoD</i>   |    |    | -1 | Cytochrome o ubiquinol oxidase subunit IV                                                               |
| BAA196NC_3329 | NA | <i>yajQ</i>   |    |    | 1  | Nucleotide-binding protein                                                                              |
| BAA196NC_3336 | NA | <i>yajO</i>   | -1 |    |    | Predicted oxidoreductase, NAD(P)-binding                                                                |
| BAA196NC_3337 | NA | <i>pgpA</i>   |    |    | -1 | Phosphatidylglycerophosphatase A                                                                        |
| BAA196NC_3339 | NA | <i>nusB</i>   |    |    | 1  | Transcription antitermination protein NusB                                                              |

|               |    |             |    |    |    |    |                                                                                                |
|---------------|----|-------------|----|----|----|----|------------------------------------------------------------------------------------------------|
| BAA196NC_3355 | NA | <i>phoR</i> |    | 1  |    |    | Sensory histidine kinase in two-component regulatory system with PhoB                          |
| BAA196NC_3361 | NA | <i>rdgC</i> |    |    | 1  |    | Recombination associated protein                                                               |
| BAA196NC_3365 | NA | <i>yaiA</i> | -1 | -1 |    |    | Hypothetical protein                                                                           |
| BAA196NC_3370 | NA | <i>psiF</i> | -1 |    |    |    | Hypothetical protein                                                                           |
| BAA196NC_3371 | NA | <i>phoA</i> |    |    |    | 1  | Bacterial alkaline phosphatase                                                                 |
| BAA196NC_3372 | NA | <i>yaiB</i> |    |    |    | 1  | Hypothetical protein                                                                           |
| BAA196NC_3400 | NA | <i>frmA</i> |    | 1  | 1  | 1  | Alcohol dehydrogenase class III/glutathione-dependent formaldehyde dehydrogenase               |
| BAA196NC_3419 | NA | <i>codA</i> | 1  |    | 1  | -1 | Cytosine deaminase                                                                             |
| BAA196NC_3420 | NA | <i>codB</i> |    |    | 1  |    | Cytosine transporter                                                                           |
| BAA196NC_3424 | NA | <i>prpB</i> |    |    |    | 1  | 2-methylisocitrate lyase                                                                       |
| BAA196NC_3426 | NA | <i>yahO</i> | -1 |    |    |    | Hypothetical protein                                                                           |
| BAA196NC_3452 | NA | <i>ykgC</i> |    |    |    | 1  | Pyridine nucleotide-disulfide oxidoreductase                                                   |
| BAA196NC_3460 | NA | <i>ykgO</i> |    |    |    | 1  | RpmJ (L36) paralog                                                                             |
| BAA196NC_3472 | NA | <i>yagR</i> | -1 |    |    | -1 | Predicted oxidoreductase with molybdenum-binding domain                                        |
| BAA196NC_3515 | NA | <i>dinJ</i> | -1 |    |    |    | Predicted antitoxin of YafQ-DinJ toxin-antitoxin system                                        |
| BAA196NC_3521 | NA | <i>ivy</i>  |    |    | 1  |    | Inhibitor of vertebrate C-lysozyme                                                             |
| BAA196NC_3526 | NA | <i>dnaQ</i> |    |    |    | 1  | DNA polymerase III subunit epsilon                                                             |
| BAA196NC_3530 | NA | <i>mltD</i> | -1 | -1 |    | 1  | Predicted membrane-bound lytic murein transglycosylase D                                       |
| BAA196NC_3546 | NA | <i>yaeP</i> |    |    |    | 1  | Hypothetical protein                                                                           |
| BAA196NC_3547 | NA | <i>rof</i>  |    |    |    | 1  | Modulator of Rho-dependent transcription termination                                           |
| BAA196NC_3550 | NA | <i>ldcC</i> |    |    |    | -1 | Lysine decarboxylase 2, constitutive                                                           |
| BAA196NC_3551 | NA | <i>accA</i> |    | -1 |    |    | Acetyl-CoA carboxylase subunit alpha                                                           |
| BAA196NC_3555 | NA | <i>lpxA</i> |    |    | 1  |    | UDP-N-acetylglucosamine acyltransferase                                                        |
| BAA196NC_3558 | NA | <i>hlpA</i> |    |    | -1 |    | Periplasmic chaperone                                                                          |
| BAA196NC_3577 | NA | <i>degP</i> | 1  | 1  |    |    | Serine endoprotease (protease Do), membrane-associated                                         |
| BAA196NC_3579 | NA | .           |    | -1 |    |    | 5'-methylthioadenosine/S-adenosylhomocysteine nucleosidase                                     |
| BAA196NC_3583 | NA | <i>clcA</i> | -1 |    |    |    | Chloride channel protein                                                                       |
| BAA196NC_3588 | NA | <i>fhuA</i> |    |    |    | 1  | Ferrichrome outer membrane transporter                                                         |
| BAA196NC_3592 | NA | <i>sfsA</i> | -1 | -1 |    |    | Sugar fermentation stimulation protein A                                                       |
| BAA196NC_3593 | NA | <i>dksA</i> | -1 | -1 |    |    | DNA-binding transcriptional regulator of rRNA transcription, DnaK suppressor protein           |
| BAA196NC_3615 | NA | <i>cueO</i> | 1  | 1  | 1  | 1  | Multicopper oxidase (laccase)                                                                  |
| BAA196NC_3620 | NA | <i>acnB</i> |    |    | 1  |    | Aconitate hydratase                                                                            |
| BAA196NC_3623 | NA | <i>aceF</i> |    |    | 1  | -1 | Dihydrolipoamide acetyltransferase                                                             |
| BAA196NC_3645 | NA | <i>murC</i> |    |    |    | 1  | UDP-N-acetylmuramate--L-alanine ligase                                                         |
| BAA196NC_3652 | NA | <i>ftsI</i> |    |    | 1  | -1 | Transpeptidase involved in septal peptidoglycan synthesis (penicillin-binding protein 3)       |
| BAA196NC_3682 | NA | <i>surA</i> |    |    |    | -1 | Peptidyl-prolyl cis-trans isomerase (PPIase)                                                   |
| BAA196NC_3716 | NA | <i>nhaA</i> |    |    |    | 1  | PH-dependent sodium/proton antiporter                                                          |
| BAA196NC_3721 | NA | <i>dnaK</i> |    |    |    | -1 | Molecular chaperone DnaK                                                                       |
| BAA196NC_3734 | NA | <i>arcA</i> |    |    |    | 1  | DNA-binding response regulator in two-component regulatory system with ArcB or CpxA            |
| BAA196NC_3761 | NA | <i>osmY</i> | 1  |    | 1  | 1  | Periplasmic protein                                                                            |
| BAA196NC_3773 | NA | <i>dnaT</i> |    |    | -1 |    | Primosomal protein I                                                                           |
| BAA196NC_3781 | NA | <i>yjiY</i> | 1  | 1  | -1 |    | Predicted inner membrane protein                                                               |
| BAA196NC_3785 | NA | <i>hsdR</i> |    |    |    | -1 | Endonuclease R                                                                                 |
| BAA196NC_3824 | NA | <i>fimA</i> |    |    | 1  |    | Major type 1 subunit fimbrin (piliin)                                                          |
| BAA196NC_3878 | NA | <i>pepA</i> |    |    | 1  |    | Leucyl aminopeptidase                                                                          |
| BAA196NC_3879 | NA | <i>holC</i> | 1  |    |    |    | DNA polymerase III subunit chi                                                                 |
| BAA196NC_3883 | NA | <i>yjgD</i> |    |    |    | -1 | Hypothetical protein                                                                           |
| BAA196NC_3889 | NA | <i>yjgI</i> |    | 1  | 1  | 1  | Predicted oxidoreductase with NAD(P)-binding Rossmann-fold domain                              |
| BAA196NC_3892 | NA | <i>pyrI</i> | 1  |    | 1  |    | Aspartate carbamoyltransferase regulatory subunit                                              |
| BAA196NC_3894 | NA | <i>mgfA</i> |    |    |    | 1  | Magnesium transporter                                                                          |
| BAA196NC_3901 | NA | <i>pmbA</i> |    |    | -1 |    | Predicted peptidase required for the maturation and secretion of the antibiotic peptide MccB17 |
| BAA196NC_3908 | NA | <i>ytfQ</i> |    |    |    | 1  | Predicted sugar transporter subunit: periplasmic-binding component of ABC superfamily          |
| BAA196NC_3909 | NA | <i>ppa</i>  |    |    |    | 1  | Inorganic pyrophosphatase                                                                      |
| BAA196NC_3933 | NA | <i>priB</i> |    |    | 1  |    | Primosomal replication protein N                                                               |
| BAA196NC_3945 | NA | <i>yjfO</i> | -1 | -1 | -1 | -1 | Hypothetical protein                                                                           |
| BAA196NC_3946 | NA | <i>yjfN</i> | -1 |    | -1 | -1 | Hypothetical protein                                                                           |
| BAA196NC_3962 | NA | <i>hfq</i>  |    |    | -1 |    | RNA-binding protein Hfq                                                                        |
| BAA196NC_3982 | NA | <i>blc</i>  |    |    |    | 1  | Outer membrane lipoprotein (lipocalin)                                                         |
| BAA196NC_3984 | NA | <i>ecnB</i> | -1 |    | -1 |    | Entericidin B membrane lipoprotein                                                             |
| BAA196NC_3994 | NA | <i>aspA</i> | -1 | -1 |    | -1 | Aspartate ammonia-lyase                                                                        |
| BAA196NC_3995 | NA | <i>dcuA</i> |    |    | -1 | -1 | C4-dicarboxylate antiporter                                                                    |
| BAA196NC_4070 | NA | <i>yjcD</i> | 1  |    | 1  |    | Predicted permease                                                                             |
| BAA196NC_4072 | NA | <i>yjbQ</i> |    | -1 |    |    | Uncharacterized protein                                                                        |
| BAA196NC_4075 | NA | <i>yjcC</i> | -1 |    |    |    | Predicted signal transduction protein (EAL domain containing protein)                          |
| BAA196NC_4079 | NA | <i>yjbR</i> | -1 |    | -1 |    | Hypothetical protein                                                                           |
| BAA196NC_4087 | NA | <i>qor</i>  |    |    |    | 1  | Quinone oxidoreductase, NADPH-dependent                                                        |
| BAA196NC_4092 | NA | <i>zur</i>  | -1 |    |    |    | DNA-binding transcriptional repressor, Zn(II)-binding                                          |
| BAA196NC_4093 | NA | <i>yjbJ</i> | -1 |    |    | 1  | Predicted stress response protein                                                              |
| BAA196NC_4102 | NA | <i>lamB</i> |    |    |    | -1 | Maltoporin precursor                                                                           |
| BAA196NC_4103 | NA | <i>malk</i> |    |    |    | -1 | Fused maltose transport subunit, ATP-binding component of ABC superfamily/regulatory protein   |

|               |                 |              |    |    |    |    |  |    |                                                                                                                                   |
|---------------|-----------------|--------------|----|----|----|----|--|----|-----------------------------------------------------------------------------------------------------------------------------------|
| BAA196NC_4119 | NA              | <i>metH</i>  |    |    |    | -1 |  |    | B12-dependent methionine synthase                                                                                                 |
| BAA196NC_4122 | NA              | <i>aceK</i>  |    |    | 1  | -1 |  |    | Bifunctional isocitrate dehydrogenase kinase/phosphatase protein                                                                  |
| BAA196NC_4123 | NA              | <i>aceA</i>  | 1  |    | 1  |    |  |    | Isocitrate lyase                                                                                                                  |
| BAA196NC_4124 | NA              | <i>aceB</i>  | 1  |    | 1  | -1 |  |    | Malate synthase                                                                                                                   |
| BAA196NC_4136 | NA              | <i>nfi</i>   |    |    |    |    |  | -1 | Endonuclease V                                                                                                                    |
| BAA196NC_4140 | NA              | <i>thiC</i>  |    |    |    |    |  | -1 | Thiamine biosynthesis protein ThiC                                                                                                |
| BAA196NC_4142 | NA              | <i>thiF</i>  |    |    |    |    |  | -1 | Thiamine biosynthesis protein ThiF                                                                                                |
| BAA196NC_4145 | NA              | <i>thiH</i>  |    |    |    |    |  | -1 | Thiamine biosynthesis protein ThiH                                                                                                |
| BAA196NC_4164 | NA              | <i>fabR</i>  |    |    | 1  |    |  |    | DNA-binding transcriptional repressor                                                                                             |
| BAA196NC_4189 | NA              | <i>metJ</i>  |    |    |    | -1 |  |    | Transcriptional repressor protein MetJ                                                                                            |
| BAA196NC_4191 | NA              | <i>rpmE</i>  | -1 | -1 | -1 | -1 |  |    | 50S ribosomal subunit protein L31                                                                                                 |
| BAA196NC_4194 | NA              | <i>ftsN</i>  |    |    |    |    |  | 1  | Essential cell division protein                                                                                                   |
| BAA196NC_4198 | NA              | <i>rraA</i>  | -1 |    |    |    |  |    | Ribonuclease activity regulator protein RraA                                                                                      |
| BAA196NC_4204 | NA              | <i>yjiT</i>  |    |    |    |    |  | 1  | Stress-induced protein                                                                                                            |
| BAA196NC_4205 | NA              | <i>yjiS</i>  |    |    |    |    |  | 1  | Hypothetical protein                                                                                                              |
| BAA196NC_4210 | NA              | <i>sbp</i>   | 1  | 1  |    |    |  | 1  | Sulfate transporter subunit                                                                                                       |
| BAA196NC_4213 | NA              | <i>cpxP</i>  |    |    |    |    |  | 1  | Periplasmic protein combats stress                                                                                                |
| BAA196NC_4234 | NA              | <i>fdoG</i>  | 1  | 1  |    |    |  | -1 | Formate dehydrogenase-O, large subunit                                                                                            |
| BAA196NC_4235 | NA              | <i>fdoH</i>  |    |    |    |    |  | -1 | Formate dehydrogenase-O, Fe-S subunit                                                                                             |
| BAA196NC_4236 | NA              | <i>fdoI</i>  | 1  |    |    |    |  |    | Formate dehydrogenase-O, cytochrome b556 subunit                                                                                  |
| BAA196NC_4237 | NA              | <i>fahE</i>  |    |    |    |    |  | -1 | Formate dehydrogenase accessory protein FdhE                                                                                      |
| BAA196NC_4260 | NA              | <i>glnL</i>  |    |    | 1  |    |  |    | Sensory histidine kinase in two-component regulatory system with GlnG                                                             |
| BAA196NC_4261 | NA              | <i>glnG</i>  |    |    |    |    |  | -1 | Fused DNA-binding response regulator in two-component regulatory system with GlnL: response regulator/sigma54 interaction protein |
| BAA196NC_4272 | NA              | <i>yihE</i>  |    |    |    |    |  | 1  | Predicted kinase                                                                                                                  |
| BAA196NC_4273 | NA              | <i>yihD</i>  |    |    |    |    |  | -1 | Hypothetical protein                                                                                                              |
| BAA196NC_4285 | NA              | <i>tatD</i>  |    |    |    |    |  | -1 | DNase, magnesium-dependent                                                                                                        |
| BAA196NC_4287 | NA              | <i>tatB</i>  |    |    |    |    |  | -1 | Sec-independent translocase                                                                                                       |
| BAA196NC_4316 | NA              | <i>cyaY</i>  |    |    |    |    |  | -1 | Fratxin-like protein                                                                                                              |
| BAA196NC_4317 | NA              | <i>cyaA</i>  | -1 |    | -1 |    |  |    | Adenylate cyclase                                                                                                                 |
| BAA196NC_4322 | NA              | <i>hemC</i>  | -1 |    |    |    |  | -1 | Porphobilinogen deaminase                                                                                                         |
| BAA196NC_4336 | NA              | <i>wzzE</i>  |    |    |    |    |  | -1 | Enterobacterial Common Antigen (ECA) polysaccharide chain length modulation protein                                               |
| BAA196NC_4341 | NA              | <i>rhlB</i>  | -1 |    |    |    |  |    | ATP-dependent RNA helicase                                                                                                        |
| BAA196NC_4342 | NA              | <i>gpp</i>   |    |    |    |    |  | 1  | Guanosine pentaphosphate/exopolysphatase                                                                                          |
| BAA196NC_4367 | NA              | <i>asnA</i>  |    |    |    |    |  | 1  | Asparagine synthetase AsnA                                                                                                        |
| BAA196NC_4383 | NA              | <i>pstS</i>  | 1  |    | 1  |    |  | 1  | Phosphate transporter subunit                                                                                                     |
| BAA196NC_4404 | NA              | <i>tnaA</i>  |    |    |    |    |  | -1 | Tryptophanase/L-cysteine desulfhydrase, PLP-dependent                                                                             |
| BAA196NC_4428 | NA              | <i>aph3</i>  |    |    |    |    |  | -1 | Aminoglycoside 3'-phosphotransferase                                                                                              |
| BAA196NC_4442 | NA              | <i>aacA6</i> | -1 |    | -1 |    |  |    | Aminoglycoside N(6)-acetyltransferase                                                                                             |
| BAA196NC_4447 | NA              | .            |    |    |    |    |  | -1 | S-(hydroxymethyl)glutathione dehydrogenase                                                                                        |
| BAA196NC_4471 | NA              | <i>terD</i>  |    |    |    |    |  | 1  | Tellurium resistance protein TerD                                                                                                 |
| BAA196NC_4472 | NA              | <i>terE</i>  |    |    |    |    |  | 1  | Tellurium resistance cAMP binding protein TerE                                                                                    |
| NA            | HMPRNC0000_0008 | <i>hutH</i>  |    |    |    |    |  | -1 | Histidine ammonia-lyase                                                                                                           |
| NA            | HMPRNC0000_0014 | .            |    |    |    |    |  | -1 | Hypothetical protein                                                                                                              |
| NA            | HMPRNC0000_0015 | .            |    |    |    |    |  | 1  | Cyclic-di-AMP phosphodiesterase GdpP                                                                                              |
| NA            | HMPRNC0000_0023 | <i>yycH</i>  |    |    |    |    |  | 1  | Two-component system YycFG regulatory protein YycH                                                                                |
| NA            | HMPRNC0000_0026 | .            |    |    |    |    |  | 1  | Zn-dependent hydrolase YycJ/WalJ                                                                                                  |
| NA            | HMPRNC0000_0027 | <i>sasH</i>  |    |    |    |    |  | -1 | Virulence-associated cell-wall-anchored protein SasH (LPXTG motif), 5'-nucleotidase                                               |
| NA            | HMPRNC0000_0034 | <i>cadC</i>  |    |    |    |    |  | 1  | Cadmium efflux system accessory protein                                                                                           |
| NA            | HMPRNC0000_0037 | .            |    |    |    |    |  | 1  | Cadmium resistance protein                                                                                                        |
| NA            | HMPRNC0000_0038 | .            |    |    |    |    |  | 1  | DNA repair protein RadC                                                                                                           |
| NA            | HMPRNC0000_0045 | <i>mecA</i>  |    |    |    |    |  | -1 | Penicillin-binding protein PBP2a, methicillin resistance determinant MecA, transpeptidase                                         |
| NA            | HMPRNC0000_0052 | .            |    |    |    |    |  | 1  | ctRNA                                                                                                                             |
| NA            | HMPRNC0000_0053 | .            |    |    |    |    |  | 1  | Uncharacterized ncRNA                                                                                                             |
| NA            | HMPRNC0000_0054 | <i>pre</i>   |    |    |    |    |  | 1  | Plasmid recombination enzyme type 3                                                                                               |
| NA            | HMPRNC0000_0055 | <i>tet</i>   |    |    |    |    |  | 1  | Tetracycline resistance, MFS efflux pump -> Tet(K)                                                                                |
| NA            | HMPRNC0000_0102 | .            |    |    |    |    |  | -1 | Protein A, von Willebrand factor binding protein Spa                                                                              |
| NA            | HMPRNC0000_0121 | .            |    |    |    |    |  | 1  | Hypothetical protein                                                                                                              |
| NA            | HMPRNC0000_0123 | <i>budC</i>  |    |    |    |    |  | 1  | 2,3-butanediol dehydrogenase, S-alcohol forming, (R)-acetoin-specific / Acetoin (diacetyl) reductase                              |
| NA            | HMPRNC0000_0129 | <i>sodA</i>  |    |    |    |    |  | 1  | Superoxide dismutase (Mn), Superoxide dismutase (Fe)                                                                              |
| NA            | HMPRNC0000_0173 | .            |    |    |    |    |  | 1  | Hypothetical protein                                                                                                              |
| NA            | HMPRNC0000_0176 | .            |    |    |    |    |  | 1  | Hypothetical protein                                                                                                              |
| NA            | HMPRNC0000_0178 | .            |    |    |    |    |  | 1  | Acyl-CoA dehydrogenase, short-chain specific                                                                                      |
| NA            | HMPRNC0000_0182 | .            |    |    |    |    |  | -1 | Polyketide synthase                                                                                                               |
| NA            | HMPRNC0000_0194 | <i>ipdC</i>  |    |    |    |    |  | -1 | Pyruvate decarboxylase, Alpha-keto-acid decarboxylase                                                                             |
| NA            | HMPRNC0000_0207 | <i>hsdR</i>  |    |    |    |    |  | -1 | Type I restriction-modification system, restriction subunit R                                                                     |
| NA            | HMPRNC0000_0234 | .            |    |    |    |    |  | -1 | Inosose isomerase                                                                                                                 |
| NA            | HMPRNC0000_0246 | .            |    |    |    |    |  | 1  | Hypothetical protein                                                                                                              |
| NA            | HMPRNC0000_0248 | <i>fadA</i>  |    |    |    |    |  | -1 | 3-ketoacyl-CoA thiolase (fadN-fadA-fadE operon)                                                                                   |
| NA            | HMPRNC0000_0249 | <i>fadB</i>  |    |    |    |    |  | -1 | 3-hydroxyacyl-CoA dehydrogenase/Enoyl-CoA hydratase                                                                               |
| NA            | HMPRNC0000_0261 | <i>ldhA</i>  |    |    |    |    |  | -1 | L-lactate dehydrogenase                                                                                                           |
| NA            | HMPRNC0000_0284 | <i>lrgB</i>  |    |    |    |    |  | 1  | LrgA-associated membrane protein LrgB                                                                                             |
| NA            | HMPRNC0000_0299 | .            |    |    |    |    |  | -1 | Hypothetical protein                                                                                                              |
| NA            | HMPRNC0000_0301 | .            |    |    |    |    |  | -1 | Hypothetical protein                                                                                                              |
| NA            | HMPRNC0000_0307 | <i>esxA</i>  |    |    |    |    |  | -1 | 6 kDa early secretory antigenic target ESAT-6 (EsxA)                                                                              |

|    |                 |              |  |    |    |       |                                                                                                    |
|----|-----------------|--------------|--|----|----|-------|----------------------------------------------------------------------------------------------------|
| NA | HMPRNC0000_0312 | <i>essC</i>  |  | -1 |    |       | FtsK/SpoIIIE family protein, putative EssC/YukB component of Type VII secretion system             |
| NA | HMPRNC0000_0334 | <i>brnQ</i>  |  |    | 1  |       | Branched-chain amino acid transport system carrier protein                                         |
| NA | HMPRNC0000_0337 | <i>lolD</i>  |  | -1 |    | -1    | ABC transporter, ATP-binding protein                                                               |
| NA | HMPRNC0000_0338 | <i>pfoR</i>  |  |    | -1 |       | Perfringolysin O regulator protein PfoR                                                            |
| NA | HMPRNC0000_0347 | .            |  | -1 |    |       | N-acetylmannosamine kinase                                                                         |
| NA | HMPRNC0000_0348 | .            |  |    | 1  |       | Sialic acid utilization regulator, RpiR family                                                     |
| NA | HMPRNC0000_0351 | <i>lip2</i>  |  | -1 | -1 | -1    | Lipase precursor                                                                                   |
| NA | HMPRNC0000_0363 | .            |  | -1 |    |       | Putative sugar-specific permease, SgaT/UlaA                                                        |
| NA | HMPRNC0000_0364 | .            |  | -1 | -1 |       | PTS system, IIB component                                                                          |
| NA | HMPRNC0000_0370 | <i>glpT</i>  |  | -1 | -1 |       | Glycerol-3-phosphate transporter                                                                   |
| NA | HMPRNC0000_0371 | <i>gloA</i>  |  | 1  |    |       | Glyoxalase/Bleomycin resistance protein/Dioxygenase superfamily                                    |
| NA | HMPRNC0000_0372 | .            |  | 1  |    |       | Luciferase-like monooxygenase YhbW                                                                 |
| NA | HMPRNC0000_0373 | .            |  | 1  | 1  | 1     | FMN reductase                                                                                      |
| NA | HMPRNC0000_0388 | .            |  |    |    | 1     | Transcriptional regulator, Xre family                                                              |
| NA | HMPRNC0000_0417 | .            |  | -1 | -1 |       | hypothetical protein                                                                               |
| NA | HMPRNC0000_0418 | .            |  |    | 1  |       | Hypothetical protein                                                                               |
| NA | HMPRNC0000_0419 | .            |  | -1 | -1 | -1    | Hypothetical protein                                                                               |
| NA | HMPRNC0000_0427 | .            |  | 1  | 1  |       | L-cystine uptake protein TcyP, sodium:anion symporter family                                       |
| NA | HMPRNC0000_0431 | .            |  | -1 | -1 |       | hypothetical protein                                                                               |
|    |                 |              |  |    |    |       | Putative transmembrane protein coupled to NADH-ubiquinone oxidoreductase chain 5 protein           |
| NA | HMPRNC0000_0467 | .            |  |    |    | -1 -1 |                                                                                                    |
| NA | HMPRNC0000_0471 | .            |  | 1  | 1  |       | PAP2 family phosphatase/haloperoxidase                                                             |
| NA | HMPRNC0000_0472 | .            |  | 1  |    |       | Esterase/lipase family protein                                                                     |
| NA | HMPRNC0000_0474 | .            |  | 1  | 1  |       | Sodium-dependent transporter                                                                       |
| NA | HMPRNC0000_0480 | <i>sle</i>   |  |    |    | -1    | Autolysin precursor                                                                                |
| NA | HMPRNC0000_0482 | .            |  | 1  |    |       | Hypothetical protein                                                                               |
| NA | HMPRNC0000_0483 | .            |  | 1  |    |       | Acetyltransferase, GNAT family                                                                     |
|    |                 |              |  |    |    |       | PTS system, trehalose-specific IIB component / PTS system, trehalose-specific IIC component        |
| NA | HMPRNC0000_0490 | <i>treP</i>  |  | 1  | 1  | -1    |                                                                                                    |
| NA | HMPRNC0000_0492 | <i>treR</i>  |  | 1  | 1  | -1    | Trehalose operon transcriptional repressor                                                         |
| NA | HMPRNC0000_0493 | .            |  | -1 | -1 | -1    | Bacterial signal recognition particle RNA                                                          |
| NA | HMPRNC0000_0495 | <i>dnaX</i>  |  | 1  | 1  |       | DNA polymerase III subunits gamma and tau                                                          |
| NA | HMPRNC0000_0504 | .            |  | -1 | -1 |       | nitrogen regulatory protein P-II (GLNB)                                                            |
| NA | HMPRNC0000_0516 | .            |  | -1 | -1 | -1 -1 | Veg protein                                                                                        |
| NA | HMPRNC0000_0518 | <i>purR</i>  |  | 1  | 1  | 1     | Pur operon repressor PurR                                                                          |
|    |                 |              |  |    |    |       | Ribosome-associated heat shock protein implicated in the recycling of the 50S subunit (S4 protein) |
| NA | HMPRNC0000_0530 | .            |  | 1  |    |       |                                                                                                    |
| NA | HMPRNC0000_0531 | .            |  |    | 1  |       | Cell division protein DivIC (FtsB), stabilizes FtsL against RasP cleavage                          |
| NA | HMPRNC0000_0532 | .            |  |    |    | -1    | RNA binding protein, contains ribosomal protein S1 domain                                          |
| NA | HMPRNC0000_0539 | <i>cysK</i>  |  | 1  | 1  |       | Cysteine synthase                                                                                  |
|    |                 |              |  |    |    |       | Pyridoxal 5'-phosphate synthase (glutamine hydrolyzing), synthase subunit                          |
| NA | HMPRNC0000_0561 | .            |  | -1 | -1 |       |                                                                                                    |
|    |                 |              |  |    |    |       | Pyridoxal 5'-phosphate synthase (glutamine hydrolyzing), glutaminase subunit                       |
| NA | HMPRNC0000_0562 | <i>pdxT</i>  |  | -1 | -1 |       |                                                                                                    |
| NA | HMPRNC0000_0563 | .            |  | -1 |    |       | Pyrimidine nucleoside transporter NupC/NucG family                                                 |
| NA | HMPRNC0000_0564 | .            |  | -1 | -1 | -1    | Pyrimidine nucleoside transporter NupC/NucG family                                                 |
| NA | HMPRNC0000_0565 | <i>ctsR</i>  |  | 1  | 1  | 1     | Transcriptional regulator CtsR                                                                     |
| NA | HMPRNC0000_0566 | .            |  | 1  | 1  | 1     | 1                                                                                                  |
| NA | HMPRNC0000_0567 | .            |  | 1  | 1  | 1     | 1                                                                                                  |
| NA | HMPRNC0000_0568 | <i>clpC</i>  |  | 1  | 1  | 1     | 1                                                                                                  |
| NA | HMPRNC0000_0572 | <i>cysE</i>  |  | 1  |    |       | Serine acetyltransferase                                                                           |
| NA | HMPRNC0000_0574 | .            |  | 1  |    |       | Mini-ribonuclease III                                                                              |
| NA | HMPRNC0000_0576 | <i>yacP</i>  |  | 1  | 1  |       | Uncharacterized protein                                                                            |
| NA | HMPRNC0000_0584 | .            |  |    |    | -1    | 16S rRNA (guanine(1207)-N(2))-methyltransferase                                                    |
| NA | HMPRNC0000_0587 | <i>rplL3</i> |  |    |    | -1    | Firmicutes ribosomal L7Ae family protein                                                           |
| NA | HMPRNC0000_0592 | .            |  | 1  |    |       | N-acetyl-L,L-diaminopimelate deacetylase                                                           |
| NA | HMPRNC0000_0597 | <i>tdh</i>   |  | -1 | -1 |       | L-threonine 3-dehydrogenase                                                                        |
| NA | HMPRNC0000_0606 | <i>sdrC</i>  |  |    |    | -1    | Adhesin SdrC                                                                                       |
| NA | HMPRNC0000_0608 | <i>sdrD</i>  |  | -1 |    |       | Adhesin SdrD                                                                                       |
| NA | HMPRNC0000_0609 | <i>sdrE</i>  |  |    |    | -1    | Adhesin SdrE                                                                                       |
| NA | HMPRNC0000_0613 | .            |  | 1  |    |       | GTP cyclohydrolase I type 2                                                                        |
| NA | HMPRNC0000_0614 | .            |  | 1  | 1  |       | GTP cyclohydrolase I type 2                                                                        |
| NA | HMPRNC0000_0615 | <i>bshB2</i> |  | 1  |    |       | N-acetylglucosaminyl-L-malate N-acetyl hydrolase                                                   |
| NA | HMPRNC0000_0616 | <i>yojF</i>  |  |    | 1  |       | Uncharacterized protein                                                                            |
| NA | HMPRNC0000_0625 | <i>vraB</i>  |  |    | -1 |       | 3-ketoacyl-CoA thiolase and Acetyl-CoA acetyltransferase                                           |
| NA | HMPRNC0000_0638 | .            |  | 1  | 1  |       | Octanoyl-(GcvH):protein N-octanoyltransferase                                                      |
| NA | HMPRNC0000_0643 | .            |  | 1  |    |       | DUF1450 superfamily protein                                                                        |
| NA | HMPRNC0000_0644 | <i>merA2</i> |  | 1  | 1  | 1     | 1                                                                                                  |
| NA | HMPRNC0000_0645 | .            |  | 1  | 1  | 1     | 1                                                                                                  |
| NA | HMPRNC0000_0645 | .            |  | 1  | 1  | 1     | 1                                                                                                  |
| NA | HMPRNC0000_0645 | .            |  | 1  | 1  | 1     | 1                                                                                                  |
| NA | HMPRNC0000_0662 | .            |  | 1  | 1  | 1     | dNTP triphosphohydrolase, broad substrate specificity                                              |
| NA | HMPRNC0000_0673 | .            |  | -1 | -1 | -1    | Hypothetical protein                                                                               |
| NA | HMPRNC0000_0689 | .            |  | 1  | 1  | 1     | 1                                                                                                  |
| NA | HMPRNC0000_0690 | <i>sitC</i>  |  | -1 | -1 |       | Manganese ABC transporter, periplasmic-binding protein SitA                                        |
| NA | HMPRNC0000_0692 | .            |  | -1 | -1 | -1 -1 | Manganese ABC transporter, ATP-binding protein SitB                                                |
| NA | HMPRNC0000_0693 | <i>sirR</i>  |  |    |    | -1    | Mn-dependent transcriptional regulator MntR                                                        |
| NA | HMPRNC0000_0704 | <i>lmrA</i>  |  |    | 1  |       | Efflux ABC transporter, permease/ATP-binding protein                                               |
| NA | HMPRNC0000_0712 | <i>fhuG</i>  |  |    | 1  |       | Ferrichrome transport system permease protein FhuG                                                 |

|    |                 |              |    |    |    |    |                                                                                                       |                                                        |
|----|-----------------|--------------|----|----|----|----|-------------------------------------------------------------------------------------------------------|--------------------------------------------------------|
| NA | HMPRNC0000_0716 | .            |    |    |    | 1  | Phosphoenolpyruvate-dihydroxyacetone phosphotransferase, subunit DhaM, DHA-specific IIA component     |                                                        |
| NA | HMPRNC0000_0717 | .            |    | 1  | 1  |    | Hypothetical protein                                                                                  |                                                        |
| NA | HMPRNC0000_0718 | .            |    | 1  | 1  |    | Hypothetical protein                                                                                  |                                                        |
| NA | HMPRNC0000_0723 | .            | 1  |    |    |    | Hypothetical protein                                                                                  |                                                        |
| NA | HMPRNC0000_0729 | .            |    | 1  | 1  |    | Putative low-affinity inorganic phosphate transporter                                                 |                                                        |
| NA | HMPRNC0000_0730 | <i>amiD7</i> | -1 | -1 | -1 |    | Secretory antigen precursor SsaA                                                                      |                                                        |
| NA | HMPRNC0000_0738 | .            | 1  |    |    |    | Hypothetical protein                                                                                  |                                                        |
| NA | HMPRNC0000_0739 | .            | 1  | 1  | 1  |    | Catabolite control protein E (CcpE), LysR family                                                      |                                                        |
| NA | HMPRNC0000_0750 | .            |    | -1 | -1 |    | hypothetical protein                                                                                  |                                                        |
| NA | HMPRNC0000_0751 | <i>uppP</i>  | -1 |    | -1 |    | Undecaprenyl-diphosphatase                                                                            |                                                        |
| NA | HMPRNC0000_0754 | <i>mgrA</i>  | -1 |    |    |    | Transcriptional regulator MgrA (Regulator of autolytic activity)                                      |                                                        |
| NA | HMPRNC0000_0771 | <i>pfkB2</i> | 1  | 1  | 1  | 1  | 1-phosphofructokinase                                                                                 |                                                        |
| NA | HMPRNC0000_0772 | <i>fruA</i>  | 1  | 1  | 1  | 1  | PTS system, fructose-specific IIA/IIB/IIC component                                                   |                                                        |
| NA | HMPRNC0000_0778 | <i>saeR</i>  | -1 | -1 | -1 |    | Response regulator SaeR, exoprotein expression protein R                                              |                                                        |
| NA | HMPRNC0000_0779 | .            |    | -1 | -1 | 1  | Hypothetical protein                                                                                  |                                                        |
| NA | HMPRNC0000_0780 | .            |    |    |    | 1  | Hypothetical protein                                                                                  |                                                        |
| NA | HMPRNC0000_0829 | .            | 1  |    |    |    | Protein co-occurring with transport systems                                                           |                                                        |
| NA | HMPRNC0000_0837 | <i>secA</i>  |    | 1  | 1  |    | Protein translocase subunit SecA                                                                      |                                                        |
| NA | HMPRNC0000_0839 | .            |    |    |    | 1  | LysM domain protein                                                                                   |                                                        |
| NA | HMPRNC0000_0859 | <i>cggR</i>  |    | 1  | 1  | -1 | -1                                                                                                    | Central glycolytic regulator                           |
| NA | HMPRNC0000_0860 | <i>gapA1</i> | 1  |    |    |    | -1                                                                                                    | NAD-dependent glyceraldehyde-3-phosphate dehydrogenase |
| NA | HMPRNC0000_0877 | <i>clfA</i>  | -1 | -1 | -1 | -1 | Clumping factor ClfA, fibrinogen-binding protein                                                      |                                                        |
| NA | HMPRNC0000_0883 | <i>cspA2</i> | -1 |    |    | -1 | Cold shock protein of CSP family                                                                      |                                                        |
| NA | HMPRNC0000_0898 | .            |    |    | 1  |    | Putative nitroreductase family protein                                                                |                                                        |
| NA | HMPRNC0000_0903 | .            | -1 |    |    |    | Glutathione-dependent thiol reductase                                                                 |                                                        |
| NA | HMPRNC0000_0909 | .            | -1 |    |    |    | Uncharacterized ncRNA                                                                                 |                                                        |
| NA | HMPRNC0000_0910 | <i>metN2</i> | 1  |    | 1  |    | Methionine ABC transporter ATP-binding protein                                                        |                                                        |
| NA | HMPRNC0000_0911 | .            | 1  |    | 1  |    | Methionine ABC transporter permease protein                                                           |                                                        |
| NA | HMPRNC0000_0912 | <i>metQ</i>  |    |    | 1  |    | Methionine ABC transporter substrate-binding protein                                                  |                                                        |
| NA | HMPRNC0000_0916 | <i>sei</i>   | -1 |    |    |    | Exotoxin, phage associated                                                                            |                                                        |
| NA | HMPRNC0000_0924 | .            |    |    | 1  |    | Hypothetical protein                                                                                  |                                                        |
| NA | HMPRNC0000_0931 | .            | 1  |    |    |    | Putative terminase, superantigen-encoding pathogenicity islands SaPI                                  |                                                        |
| NA | HMPRNC0000_0942 | .            |    | -1 | -1 |    | hemolysin                                                                                             |                                                        |
| NA | HMPRNC0000_0947 | .            |    |    |    | -1 | UPF0721 transmembrane protein YunE                                                                    |                                                        |
| NA | HMPRNC0000_0948 | .            |    | 1  | 1  |    | 5'-nucleotidase family protein                                                                        |                                                        |
| NA | HMPRNC0000_0958 | <i>dltB</i>  |    |    |    | 1  | D-alanyl transfer protein DltB                                                                        |                                                        |
| NA | HMPRNC0000_0960 | <i>dltD</i>  |    |    |    | 1  | Poly(glycerophosphate chain) D-alanine transfer protein DltD                                          |                                                        |
| NA | HMPRNC0000_0964 | .            | 1  |    |    |    | DUF1450 superfamily protein                                                                           |                                                        |
| NA | HMPRNC0000_0969 | .            | 1  | 1  | 1  | 1  | Histidine permease YuiF                                                                               |                                                        |
| NA | HMPRNC0000_0978 | <i>mnhD</i>  |    | 1  | 1  |    | Na(+) H(+) antiporter subunit D                                                                       |                                                        |
| NA | HMPRNC0000_0981 | <i>mnhA</i>  |    |    |    | -1 | Na(+) H(+) antiporter subunit A                                                                       |                                                        |
| NA | HMPRNC0000_0985 | .            |    |    |    | -1 | General stress protein 13                                                                             |                                                        |
| NA | HMPRNC0000_0991 | <i>argG</i>  | 1  |    | 1  |    | Argininosuccinate synthase                                                                            |                                                        |
| NA | HMPRNC0000_0997 | <i>addB</i>  | 1  |    | 1  |    | ATP-dependent helicase/nuclease AddAB, subunit B                                                      |                                                        |
| NA | HMPRNC0000_1001 | <i>fahA</i>  | -1 | -1 | -1 |    | Fumarylacetoacetate hydrolase family protein                                                          |                                                        |
| NA | HMPRNC0000_1005 | <i>yitU</i>  |    |    | 1  |    | Haloacid dehalogenase hydrolase                                                                       |                                                        |
| NA | HMPRNC0000_1010 | .            | 1  | 1  |    |    | Transcriptional regulator, LysR family                                                                |                                                        |
| NA | HMPRNC0000_1013 | .            |    |    |    | 1  | Hypothetical protein                                                                                  |                                                        |
| NA | HMPRNC0000_1014 | .            |    |    |    | 1  | Hypothetical protein                                                                                  |                                                        |
| NA | HMPRNC0000_1031 | <i>mecA2</i> | 1  |    | 1  |    | Negative regulator of genetic competence, sporulation and motility                                    |                                                        |
| NA | HMPRNC0000_1033 | <i>pepF</i>  | -1 |    |    |    | Oligoendopeptidase F                                                                                  |                                                        |
| NA | HMPRNC0000_1040 | <i>ppnK</i>  |    |    |    | 1  | NAD kinase                                                                                            |                                                        |
| NA | HMPRNC0000_1041 | <i>yjbO</i>  |    |    | 1  |    | Ribosomal large subunit pseudouridine synthase D                                                      |                                                        |
| NA | HMPRNC0000_1050 | .            | -1 | -1 | -1 | -1 | 2H phosphoesterase superfamily protein Bsu1186 (yjcG)                                                 |                                                        |
| NA | HMPRNC0000_1063 | .            |    | -1 | -1 | 1  | Hypothetical protein                                                                                  |                                                        |
| NA | HMPRNC0000_1086 | <i>atl</i>   | -1 | -1 | -1 |    | N-acetylmuramoyl-L-alanine amidase / Endo-beta-N-acetylglucosaminidase and Bifunctional autolysin Atl |                                                        |
| NA | HMPRNC0000_1089 | .            |    |    |    | -1 | Cell envelope-associated transcriptional attenuator LytR-CpsA-Psr, subfamily F2                       |                                                        |
| NA | HMPRNC0000_1093 | <i>qoxD</i>  | -1 | -1 | -1 |    | Cytochrome aa3-600 menaquinol oxidase subunit IV                                                      |                                                        |
| NA | HMPRNC0000_1095 | <i>qoxA</i>  |    |    |    | -1 | Cytochrome aa3-600 menaquinol oxidase subunit II                                                      |                                                        |
| NA | HMPRNC0000_1098 | <i>folD</i>  | -1 | -1 | -1 | -1 | Methylenetetrahydrofolate cyclohydrolase / Methylenetetrahydrofolate dehydrogenase (NADP+)            |                                                        |
| NA | HMPRNC0000_1103 | <i>purS</i>  |    |    |    | -1 | Phosphoribosylformylglycinamide synthase, PurS subunit                                                |                                                        |
| NA | HMPRNC0000_1104 | <i>purQ</i>  | -1 | -1 |    |    | Phosphoribosylformylglycinamide synthase, glutamine amidotransferase subunit                          |                                                        |
| NA | HMPRNC0000_1105 | <i>purL</i>  | -1 | -1 |    | -1 | Phosphoribosylformylglycinamide synthase, synthetase subunit                                          |                                                        |
| NA | HMPRNC0000_1113 | .            | -1 | -1 | -1 |    | Duplicated ATPase component YkoD                                                                      |                                                        |
| NA | HMPRNC0000_1114 | .            | -1 | -1 | -1 | -1 | Substrate-specific component YkoE of thiamin-regulated ECF transporter for HydroxyMethylPyrimidine    |                                                        |
| NA | HMPRNC0000_1126 | <i>ktrA</i>  | 1  |    |    |    | KtrCD potassium uptake system, peripheral membrane component KtrC                                     |                                                        |
| NA | HMPRNC0000_1127 | .            |    | 1  | 1  |    | Ribonuclease J1 (endonuclease and 5' exonuclease)                                                     |                                                        |
| NA | HMPRNC0000_1145 | .            | 1  |    |    |    | Hypothetical protein                                                                                  |                                                        |
| NA | HMPRNC0000_1149 | .            |    |    |    | 1  | Hypothetical protein                                                                                  |                                                        |
| NA | HMPRNC0000_1153 | .            | 1  |    |    | 1  | UPF0358 protein YlaN                                                                                  |                                                        |
| NA | HMPRNC0000_1191 | .            | 1  | 1  |    |    | DNA polymerase X family                                                                               |                                                        |
| NA | HMPRNC0000_1192 | <i>mutS3</i> | 1  | 1  |    |    | Recombination inhibitory protein MutS2                                                                |                                                        |

|    |                 |              |  |  |    |    |    |    |                                                                                         |                                             |
|----|-----------------|--------------|--|--|----|----|----|----|-----------------------------------------------------------------------------------------|---------------------------------------------|
| NA | HMPRNC0000_1195 | <i>sdhC</i>  |  |  |    |    |    |    | Succinate dehydrogenase cytochrome b558 subunit                                         |                                             |
| NA | HMPRNC0000_1203 | .            |  |  | 1  | 1  |    |    | Hypothetical protein                                                                    |                                             |
| NA | HMPRNC0000_1206 | <i>fib</i>   |  |  |    |    |    | 1  | Extracellular fibrinogen-binding protein Efb                                            |                                             |
| NA | HMPRNC0000_1207 | <i>scn</i>   |  |  | 1  |    |    |    | Fibrinogen-binding prophage protein                                                     |                                             |
| NA | HMPRNC0000_1210 | <i>hly</i>   |  |  |    |    |    | 1  | Cytolytic pore-forming protein -> Alpha-hemolysin                                       |                                             |
| NA | HMPRNC0000_1227 | <i>bshC</i>  |  |  | 1  | 1  | 1  | 1  | Glucosaminyl-malate:cysteine ligase                                                     |                                             |
|    |                 |              |  |  |    |    |    |    | Cell division protein FtsI (Peptidoglycan synthetase) and Penicillin-binding protein 2B |                                             |
| NA | HMPRNC0000_1230 | <i>pbpl</i>  |  |  | -1 |    |    |    |                                                                                         |                                             |
| NA | HMPRNC0000_1233 | <i>divlB</i> |  |  | -1 | -1 |    |    | Cell division protein FtsQ                                                              |                                             |
| NA | HMPRNC0000_1234 | <i>ftsA</i>  |  |  | -1 | -1 |    |    | Cell division protein FtsA                                                              |                                             |
| NA | HMPRNC0000_1243 | .            |  |  |    |    |    | -1 | Cell division initiation protein DivIVA                                                 |                                             |
| NA | HMPRNC0000_1251 | <i>upp2</i>  |  |  | -1 |    |    |    | Pyrimidine operon regulatory protein PyrR                                               |                                             |
| NA | HMPRNC0000_1258 | <i>pyrE</i>  |  |  |    |    |    | 1  | Orotate phosphoribosyltransferase                                                       |                                             |
| NA | HMPRNC0000_1261 | <i>fbpA</i>  |  |  |    | 1  | 1  |    | Fibronectin/fibrinogen-binding protein                                                  |                                             |
| NA | HMPRNC0000_1269 | .            |  |  | -1 |    |    |    | Hypothetical protein                                                                    |                                             |
| NA | HMPRNC0000_1271 | .            |  |  | -1 | -1 |    |    | hypothetical protein                                                                    |                                             |
| NA | HMPRNC0000_1277 | <i>prkC</i>  |  |  |    | 1  | 1  |    | Serine/threonine protein kinase PrkC, regulator of stationary phase                     |                                             |
|    |                 |              |  |  |    |    |    |    | LSU ribosomal protein L28p and LSU ribosomal protein L28p, zinc-independent             |                                             |
| NA | HMPRNC0000_1281 | <i>rpmB</i>  |  |  | -1 | -1 | -1 |    |                                                                                         |                                             |
| NA | HMPRNC0000_1283 | .            |  |  | -1 |    |    |    | Dihydroxyacetone kinase                                                                 |                                             |
| NA | HMPRNC0000_1287 | .            |  |  |    | 1  | 1  |    | Transcription factor FapR                                                               |                                             |
| NA | HMPRNC0000_1321 | <i>tsf</i>   |  |  |    | 1  | 1  |    | Translation elongation factor Ts                                                        |                                             |
| NA | HMPRNC0000_1328 | <i>polC</i>  |  |  |    | 1  | 1  |    | DNA polymerase III polC-type                                                            |                                             |
|    |                 |              |  |  |    |    |    |    | Putative nucleic-acid-binding protein implicated in transcription termination           |                                             |
| NA | HMPRNC0000_1332 | .            |  |  | 1  |    |    |    |                                                                                         |                                             |
| NA | HMPRNC0000_1341 | .            |  |  |    | 1  | 1  |    | Ribonuclease J2 (endoribonuclease in RNA processing)                                    |                                             |
| NA | HMPRNC0000_1347 | .            |  |  |    | 1  | 1  |    | ACT domain protein                                                                      |                                             |
| NA | HMPRNC0000_1352 | <i>cvfA</i>  |  |  |    |    |    | 1  | Ribonuclease Y                                                                          |                                             |
| NA | HMPRNC0000_1356 | <i>porB</i>  |  |  |    |    | 1  |    | 2-oxoglutarate/2-oxoacid ferredoxin oxidoreductase, beta subunit                        |                                             |
| NA | HMPRNC0000_1368 | <i>glpD</i>  |  |  |    |    |    | 1  | Aerobic glycerol-3-phosphate dehydrogenase                                              |                                             |
|    |                 |              |  |  |    |    |    |    | FemC, factor involved in methicillin resistance / Glutamine synthetase repressor        |                                             |
| NA | HMPRNC0000_1377 | <i>glnR</i>  |  |  | -1 |    |    |    |                                                                                         |                                             |
| NA | HMPRNC0000_1421 | .            |  |  | -1 | -1 |    |    | Hypothetical protein                                                                    |                                             |
| NA | HMPRNC0000_1423 | <i>thrA</i>  |  |  |    | 1  | 1  |    | Homoserine dehydrogenase                                                                |                                             |
| NA | HMPRNC0000_1424 | <i>thrC</i>  |  |  |    | 1  |    |    | Threonine synthase                                                                      |                                             |
| NA | HMPRNC0000_1438 | .            |  |  |    |    |    | -1 | Hypothetical protein                                                                    |                                             |
| NA | HMPRNC0000_1448 | <i>opuD2</i> |  |  | -1 | 1  | -1 | 1  | Glycine betaine transporter OpuD                                                        |                                             |
| NA | HMPRNC0000_1463 | <i>msrR</i>  |  |  | -1 | -1 |    |    | Peptide methionine sulfoxide reductase regulator MsrR                                   |                                             |
| NA | HMPRNC0000_1472 | <i>trpF</i>  |  |  |    | -1 | -1 | -1 | Phosphoribosylanthranilate isomerase                                                    |                                             |
| NA | HMPRNC0000_1483 | <i>pepF</i>  |  |  | -1 |    |    |    | Oligoendopeptidase F                                                                    |                                             |
| NA | HMPRNC0000_1512 | .            |  |  |    |    |    | -1 | 5-bromo-4-chloroindolyl phosphate hydrolysis protein XpaC                               |                                             |
| NA | HMPRNC0000_1514 | <i>brnQ</i>  |  |  |    | 1  |    |    | Branched-chain amino acid transport system carrier protein                              |                                             |
| NA | HMPRNC0000_1515 | .            |  |  |    | 1  | 1  | 1  | Nitric oxide reductase activation protein NorD                                          |                                             |
| NA | HMPRNC0000_1541 | .            |  |  |    |    |    | -1 | Surface anchored protein                                                                |                                             |
| NA | HMPRNC0000_1543 | <i>ebh</i>   |  |  |    | 1  | 1  | -1 | Surface anchored protein                                                                |                                             |
| NA | HMPRNC0000_1550 | .            |  |  |    |    | -1 |    | DNA polymerase I 5'-3' exonuclease domain                                               |                                             |
| NA | HMPRNC0000_1552 | .            |  |  | -1 |    |    |    | Bsub YpbR                                                                               |                                             |
| NA | HMPRNC0000_1553 | .            |  |  | -1 |    |    |    | Iron-regulated membrane protein, Iron-uptake factor PiuB                                |                                             |
| NA | HMPRNC0000_1554 | .            |  |  |    |    |    | -1 | 23S rRNA (guanine(2445)-N(2))-methyltransferase                                         |                                             |
| NA | HMPRNC0000_1555 | .            |  |  | -1 | -1 | -1 | -1 | Bacterial RNase P class B                                                               |                                             |
| NA | HMPRNC0000_1559 | <i>recU</i>  |  |  | -1 | 1  | -1 | 1  | RecU Holliday junction resolvase                                                        |                                             |
|    |                 |              |  |  |    |    |    |    | Multimodular transpeptidase-transglycosylase / Penicillin-binding protein 1A/1B (PBP1)  |                                             |
| NA | HMPRNC0000_1560 | <i>pbp</i>   |  |  |    | 1  | 1  |    |                                                                                         |                                             |
| NA | HMPRNC0000_1563 | .            |  |  |    | 1  |    |    | Hypothetical protein                                                                    |                                             |
| NA | HMPRNC0000_1576 | .            |  |  |    | 1  |    |    | Hypothetical protein                                                                    |                                             |
| NA | HMPRNC0000_1577 | .            |  |  |    |    | 1  |    | Hypothetical protein                                                                    |                                             |
| NA | HMPRNC0000_1578 | .            |  |  |    |    | 1  |    | TPR-repeat-containing protein                                                           |                                             |
| NA | HMPRNC0000_1591 | <i>rpsA</i>  |  |  | -1 |    |    |    | SSU ribosomal protein S1p                                                               |                                             |
| NA | HMPRNC0000_1597 | <i>recQ</i>  |  |  |    |    |    | -1 | ATP-dependent DNA helicase RecS (RecQ family)                                           |                                             |
| NA | HMPRNC0000_1608 | <i>srrB</i>  |  |  |    |    |    | -1 | Respiratory response protein SrrB                                                       |                                             |
| NA | HMPRNC0000_1618 | <i>nudF</i>  |  |  | -1 |    |    |    | ADP-ribose pyrophosphatase                                                              |                                             |
|    |                 |              |  |  |    |    |    |    | Glyoxalase/bleomycin resistance protein/dioxygenase superfamily protein                 |                                             |
| NA | HMPRNC0000_1631 | .            |  |  |    |    |    | -1 |                                                                                         |                                             |
|    |                 |              |  |  |    |    |    |    | Glycine dehydrogenase (decarboxylating) (glycine cleavage system P2 protein)            |                                             |
| NA | HMPRNC0000_1662 | <i>gcvP2</i> |  |  | -1 | -1 |    |    |                                                                                         |                                             |
|    |                 |              |  |  |    |    |    |    | Glycine dehydrogenase (decarboxylating) (glycine cleavage system P1 protein)            |                                             |
| NA | HMPRNC0000_1663 | <i>gcvP</i>  |  |  | -1 | -1 |    |    |                                                                                         |                                             |
| NA | HMPRNC0000_1679 | <i>fthC</i>  |  |  |    |    |    | 1  | 5-formyltetrahydrofolate cyclo-ligase                                                   |                                             |
| NA | HMPRNC0000_1681 | <i>pbp3</i>  |  |  |    |    | -1 |    | Conserved protein Pbp3                                                                  |                                             |
| NA | HMPRNC0000_1691 | <i>dnaG</i>  |  |  |    | 1  | 1  |    | DNA primase                                                                             |                                             |
| NA | HMPRNC0000_1694 | <i>glyS</i>  |  |  |    | -1 | -1 |    | Glycyl-tRNA synthetase                                                                  |                                             |
| NA | HMPRNC0000_1704 | .            |  |  |    |    |    | -1 | Hypothetical protein                                                                    |                                             |
| NA | HMPRNC0000_1707 | <i>prmA</i>  |  |  |    | 1  | 1  | 1  | 1                                                                                       | Ribosomal protein L11 methyltransferase     |
| NA | HMPRNC0000_1710 | <i>dnaK</i>  |  |  |    | 1  | 1  | 1  | 1                                                                                       | Chaperone protein DnaK                      |
| NA | HMPRNC0000_1713 | <i>hrcA</i>  |  |  |    | 1  | 1  | 1  | 1                                                                                       | Heat-inducible transcription repressor HrcA |
| NA | HMPRNC0000_1735 | .            |  |  | -1 |    |    |    | Metal ion transporter YcsG, Mn(2+)/Fe(2+) NRAMP family                                  |                                             |
| NA | HMPRNC0000_1737 | <i>accC</i>  |  |  |    |    | -1 |    | Biotin carboxylase                                                                      |                                             |
| NA | HMPRNC0000_1745 | .            |  |  |    | 1  |    |    | Protease small subunit YrrN                                                             |                                             |
| NA | HMPRNC0000_1759 | .            |  |  |    |    |    | 1  | HesA/MoeB/ThiF family protein                                                           |                                             |
| NA | HMPRNC0000_1760 | .            |  |  | -1 | -1 | -1 | 1  | 6S / SsrS RNA                                                                           |                                             |

|    |                 |              |    |    |    |    |                                                                                                 |
|----|-----------------|--------------|----|----|----|----|-------------------------------------------------------------------------------------------------|
| NA | HMPRNC0000_1772 | <i>queA</i>  |    |    |    | -1 | S-adenosylmethionine:tRNA ribosyltransferase-isomerase                                          |
| NA | HMPRNC0000_1777 | <i>cgtA</i>  | 1  | 1  | 1  |    | GTP-binding protein Obg                                                                         |
| NA | HMPRNC0000_1790 | .            |    |    | 1  |    | 3'UTR                                                                                           |
| NA | HMPRNC0000_1802 | <i>clpX</i>  |    | 1  | 1  |    | ATP-dependent Clp protease ATP-binding subunit ClpX                                             |
| NA | HMPRNC0000_1804 | <i>tig</i>   |    | 1  | 1  | 1  | Cell division trigger factor                                                                    |
| NA | HMPRNC0000_1805 | .            |    |    |    | -1 | Hypothetical protein                                                                            |
| NA | HMPRNC0000_1809 | <i>infC</i>  | 1  |    |    |    | Translation initiation factor 3                                                                 |
| NA | HMPRNC0000_1812 | <i>dnal</i>  |    | 1  | 1  |    | Helicase loader Dnal                                                                            |
| NA | HMPRNC0000_1827 | <i>cycA2</i> | -1 |    |    | -1 | D-serine/D-alanine/glycine transporter                                                          |
| NA | HMPRNC0000_1834 | <i>maeB</i>  | -1 |    |    |    | NADP-dependent malic enzyme                                                                     |
| NA | HMPRNC0000_1836 | .            |    |    |    | -1 | 3'-to-5' oligoribonuclease A                                                                    |
| NA | HMPRNC0000_1839 | .            | -1 | -1 | -1 | 1  | 1 Universal stress protein family                                                               |
| NA | HMPRNC0000_1842 | .            | -1 | -1 |    |    | Transcript                                                                                      |
| NA | HMPRNC0000_1843 | <i>ald</i>   | -1 | -1 |    | 1  | Alanine dehydrogenase                                                                           |
| NA | HMPRNC0000_1845 | .            |    | -1 | -1 | 1  | 1 Universal stress protein family                                                               |
| NA | HMPRNC0000_1858 | .            |    |    | -1 | 1  | Transcript                                                                                      |
| NA | HMPRNC0000_1863 | .            |    |    | 1  |    | Phosphoserine aminotransferase, putative                                                        |
| NA | HMPRNC0000_1864 | <i>serA</i>  | 1  | 1  |    |    | D-3-phosphoglycerate dehydrogenase                                                              |
| NA | HMPRNC0000_1868 | .            |    |    | -1 | 1  | Serine protease, DegP/HtrA                                                                      |
| NA | HMPRNC0000_1875 | <i>fhs</i>   | -1 | -1 |    |    | Formate-tetrahydrofolate ligase                                                                 |
| NA | HMPRNC0000_1876 | <i>acsA2</i> | -1 | -1 |    |    | Acetyl-CoA synthetase                                                                           |
| NA | HMPRNC0000_1879 | <i>acuC</i>  |    |    |    | -1 | NAD-independent protein deacetylase AcuC                                                        |
| NA | HMPRNC0000_1881 | <i>aroF</i>  |    |    |    | 1  | Chorismate mutase I / 2-keto-3-deoxy-D-arabino-heptulosonate-7-phosphate synthase I beta        |
| NA | HMPRNC0000_1882 | .            |    | -1 | -1 |    | hypothetical protein                                                                            |
| NA | HMPRNC0000_1883 | .            |    | -1 | -1 |    | hypothetical protein                                                                            |
| NA | HMPRNC0000_1884 | .            |    | -1 | -1 |    | hypothetical protein                                                                            |
| NA | HMPRNC0000_1902 | .            | 1  |    |    |    | Rhodanese-like domain protein                                                                   |
| NA | HMPRNC0000_1906 | .            | 1  |    |    |    | Putative rRNA methylase YtqB                                                                    |
| NA | HMPRNC0000_1907 | <i>rot</i>   | -1 | -1 |    |    | Repressor of toxins Rot                                                                         |
| NA | HMPRNC0000_1909 | <i>putA</i>  | -1 | -1 | -1 | -1 | Proline dehydrogenase                                                                           |
| NA | HMPRNC0000_1911 | <i>ribB</i>  |    |    |    | 1  | 3,4-dihydroxy-2-butanone 4-phosphate synthase / GTP cyclohydrolase II                           |
| NA | HMPRNC0000_1914 | .            |    |    |    | -1 | Hypothetical protein                                                                            |
| NA | HMPRNC0000_1935 | .            | -1 | -1 |    |    | Hypothetical protein                                                                            |
| NA | HMPRNC0000_1936 | .            | -1 | -1 |    |    | Hypothetical protein                                                                            |
| NA | HMPRNC0000_1937 | .            | -1 | -1 |    |    | Hypothetical protein                                                                            |
| NA | HMPRNC0000_1939 | .            | -1 | -1 |    |    | Hypothetical protein                                                                            |
| NA | HMPRNC0000_1947 | .            |    |    | -1 |    | Type I restriction-modification system, specificity subunit S                                   |
| NA | HMPRNC0000_1980 | .            |    |    |    | -1 | ABC transporter, ATP-binding protein EcsA                                                       |
| NA | HMPRNC0000_1982 | .            |    | -1 | -1 |    | Hypothetical protein                                                                            |
| NA | HMPRNC0000_1984 | <i>prsA2</i> | -1 | -1 |    |    | Foldase protein PrsA precursor and Foldase clustered with pyrimidine conversion                 |
| NA | HMPRNC0000_2004 | .            | 1  | 1  |    |    | ABC transporter/substrate-binding protein/ABC transporter, permease protein                     |
| NA | HMPRNC0000_2049 | <i>yfhP</i>  |    |    |    | 1  | conserved membrane protein YfhP                                                                 |
| NA | HMPRNC0000_2062 | .            | -1 |    |    |    | Acyl-CoA hydrolase                                                                              |
| NA | HMPRNC0000_2066 | .            | -1 | -1 | -1 |    | Hypothetical protein                                                                            |
| NA | HMPRNC0000_2067 | <i>yihY</i>  | -1 |    |    |    | Inner membrane protein YihY, formerly thought to be RNase BN                                    |
| NA | HMPRNC0000_2069 | <i>vraS</i>  |    |    |    | -1 | Sensor histidine kinase VraS                                                                    |
| NA | HMPRNC0000_2075 | .            | 1  | 1  |    |    | Putative amidotransferase similar to cobyrinic acid synthase                                    |
| NA | HMPRNC0000_2076 | <i>murE</i>  | 1  | 1  |    |    | Putative amino acid ligase found clustered with an amidotransferase                             |
| NA | HMPRNC0000_2084 | <i>gatB</i>  |    | 1  | 1  |    | Aspartyl-tRNA(Asn) amidotransferase subunit B and Glutamyl-tRNA(Gln) amidotransferase subunit B |
| NA | HMPRNC0000_2086 | <i>gatC</i>  |    |    |    | -1 | Aspartyl-tRNA(Asn) amidotransferase subunit C and Glutamyl-tRNA(Gln) amidotransferase subunit C |
| NA | HMPRNC0000_2092 | <i>purB</i>  | -1 | -1 |    |    | Adenylosuccinate lyase and SAICAR lyase                                                         |
| NA | HMPRNC0000_2104 | <i>sdcS</i>  | -1 |    |    |    | Sodium-dependent anion transporter family                                                       |
| NA | HMPRNC0000_2128 | <i>mapW2</i> |    | -1 | -1 |    | Extracellular adherence protein of broad specificity Eap/Map                                    |
| NA | HMPRNC0000_2132 | <i>scn</i>   | 1  |    |    |    | Fibrinogen binding phage associated protein                                                     |
| NA | HMPRNC0000_2135 | <i>lytN</i>  | 1  |    |    |    | Phage lysin, N-acetylmuramoyl-L-alanine amidase                                                 |
| NA | HMPRNC0000_2191 | .            |    |    |    | 1  | Cytolytic pore-forming protein S component -> Leukocidin LukS-PV                                |
| NA | HMPRNC0000_2202 | .            | -1 | -1 |    |    | Hypothetical protein                                                                            |
| NA | HMPRNC0000_2204 | .            | 1  | 1  |    |    | Nitroreductase family protein                                                                   |
| NA | HMPRNC0000_2229 | <i>yeaZ</i>  |    |    |    | -1 | TRNA threonylcarbamoyladenosine biosynthesis protein TsaB                                       |
| NA | HMPRNC0000_2235 | <i>iivC</i>  | 1  | 1  |    |    | Ketol-acid reductoisomerase (NADP(+))                                                           |
| NA | HMPRNC0000_2243 | .            |    |    |    | 1  | Mobile element protein                                                                          |
| NA | HMPRNC0000_2268 | <i>deaD</i>  |    | 1  | 1  |    | DEAD-box ATP-dependent RNA helicase DeaD                                                        |
| NA | HMPRNC0000_2280 | <i>yidC</i>  |    |    | -1 |    | Inner membrane protein translocase and chaperone YidC                                           |
| NA | HMPRNC0000_2285 | <i>tenA</i>  | -1 | -1 |    |    | Thiaminease II involved in salvage of thiamine pyrimidine moiety                                |
| NA | HMPRNC0000_2300 | <i>atpE</i>  | -1 | -1 |    |    | ATP synthase F0 sector subunit c                                                                |
| NA | HMPRNC0000_2302 | .            | -1 | -1 |    |    | Uncharacterized ncRNA                                                                           |
| NA | HMPRNC0000_2306 | <i>ywlG</i>  | -1 | -1 | -1 |    | UPF0340 protein YwlG                                                                            |
| NA | HMPRNC0000_2319 | .            | 1  | 1  |    |    | Transcriptional regulator, HxlR family                                                          |
| NA | HMPRNC0000_2332 | .            | 1  | 1  |    |    | Hypothetical protein                                                                            |
| NA | HMPRNC0000_2349 | <i>czrA</i>  | 1  | 1  | 1  |    | Zn(II) or Co(II)-specific transcriptional repressor protein                                     |
| NA | HMPRNC0000_2351 | .            |    |    |    | -1 | Lytic regulatory protein                                                                        |
| NA | HMPRNC0000_2358 | <i>mtlA</i>  |    |    |    | 1  | PTS system, mannitol-specific IIC component / PTS system, mannitol-specific IIB component       |



|    |                 |              |    |    |  |    |                                                                                                                                          |
|----|-----------------|--------------|----|----|--|----|------------------------------------------------------------------------------------------------------------------------------------------|
| NA | HMPRNC0000_2363 | <i>fmtB1</i> |    |    |  | 1  | FmtB (Mrp) protein involved in methicillin resistance and cell wall biosynthesis                                                         |
| NA | HMPRNC0000_2370 | <i>rocF</i>  | -1 |    |  |    | Arginase                                                                                                                                 |
| NA | HMPRNC0000_2384 | <i>sepA</i>  |    |    |  | -1 | Uncharacterized ncRNA                                                                                                                    |
| NA | HMPRNC0000_2387 | .            |    |    |  | -1 | N-acetylglucosamine-1-phosphate uridylyltransferase eukaryotic                                                                           |
| NA | HMPRNC0000_2389 | .            |    |    |  | 1  | Hypothetical protein                                                                                                                     |
| NA | HMPRNC0000_2401 | <i>asp</i>   | -1 | -1 |  | -1 | Alkaline shock protein 23                                                                                                                |
| NA | HMPRNC0000_2403 | .            |    |    |  | -1 | Hypothetical protein                                                                                                                     |
|    |                 |              |    |    |  |    | Bifunctional protein: zinc-containing alcohol dehydrogenase, quinone oxidoreductase (NADPH:quinone reductase), Similar to arginate lyase |
| NA | HMPRNC0000_2405 | .            | 1  |    |  | 1  |                                                                                                                                          |
| NA | HMPRNC0000_2407 | .            |    |    |  | 1  | Cell surface hydrolase (putative)                                                                                                        |
| NA | HMPRNC0000_2409 | <i>lacG</i>  | -1 |    |  | -1 | 6-phospho-beta-galactosidase                                                                                                             |
| NA | HMPRNC0000_2471 | <i>glcU</i>  | 1  |    |  |    | Glucose:proton symporter GlcU                                                                                                            |
| NA | HMPRNC0000_2473 | .            |    |    |  | -1 | Hypothetical protein                                                                                                                     |
| NA | HMPRNC0000_2485 | <i>sarV</i>  | 1  |    |  | 1  | Transcriptional regulator SarV (accessory regulator V)                                                                                   |
| NA | HMPRNC0000_2528 | <i>ssaA</i>  | -1 |    |  | -1 | Secretory antigen precursor SsaA                                                                                                         |
| NA | HMPRNC0000_2538 | .            |    |    |  | -1 | hypothetical protein                                                                                                                     |
| NA | HMPRNC0000_2539 | <i>yjgC</i>  |    |    |  | -1 | putative oxidoreductase YjgC                                                                                                             |
| NA | HMPRNC0000_2545 | .            | 1  |    |  | 1  | Transcriptional regulator, DeoR family                                                                                                   |
| NA | HMPRNC0000_2547 | .            | -1 |    |  | -1 | Protein of pXO2-46                                                                                                                       |
| NA | HMPRNC0000_2564 | .            | 1  |    |  |    | Hypothetical protein                                                                                                                     |
| NA | HMPRNC0000_2566 | .            |    |    |  | -1 | hypothetical protein                                                                                                                     |
| NA | HMPRNC0000_2569 | <i>hipO</i>  | 1  |    |  |    | N-acetyl-L,L-diaminopimelate deacetylase                                                                                                 |
| NA | HMPRNC0000_2570 | <i>hutI</i>  | -1 |    |  | -1 | Imidazolonepropionase                                                                                                                    |
| NA | HMPRNC0000_2572 | <i>hutU</i>  | -1 |    |  | -1 | Urocanate hydratase                                                                                                                      |
| NA | HMPRNC0000_2574 | <i>hutG</i>  |    |    |  | -1 | Formiminoglutamase                                                                                                                       |
| NA | HMPRNC0000_2581 | .            | -1 |    |  |    | ABC-type Na+ efflux pump, permease component                                                                                             |
| NA | HMPRNC0000_2582 | .            | -1 |    |  |    | ABC transporter, ATP-binding protein                                                                                                     |
| NA | HMPRNC0000_2615 | .            |    |    |  | -1 | Uncharacterized ncRNA                                                                                                                    |
| NA | HMPRNC0000_2633 | .            | -1 | -1 |  | -1 | 1 Putative type II DNA modification enzyme                                                                                               |
| NA | HMPRNC0000_2660 | <i>cbiX</i>  | -1 | -1 |  | -1 | Sirohydrochlorin ferrochelatase SirB                                                                                                     |
| NA | HMPRNC0000_2669 | .            |    |    |  | 1  | Hypothetical protein                                                                                                                     |
| NA | HMPRNC0000_2673 | .            | 1  | 1  |  | 1  | L-cystine ABC transporter, ATP-binding protein TcyC                                                                                      |
| NA | HMPRNC0000_2674 | .            |    |    |  | 1  | Transcript                                                                                                                               |
| NA | HMPRNC0000_2685 | <i>sbi</i>   | 1  |    |  | 1  | 1 IgG-binding protein SBI                                                                                                                |
| NA | HMPRNC0000_2687 | <i>hlgA</i>  | 1  | -1 |  | 1  | Cytolytic pore-forming protein S component -> Gamma-hemolysin HlgA                                                                       |
| NA | HMPRNC0000_2689 | <i>lukS</i>  |    |    |  | 1  | Cytolytic pore-forming protein S component -> Gamma-hemolysin HlgC                                                                       |
| NA | HMPRNC0000_2691 | <i>hlgB</i>  | 1  | -1 |  | 1  | Cytolytic pore-forming protein F component -> Gamma-hemolysin HlgB                                                                       |
| NA | HMPRNC0000_2708 | .            | 1  |    |  |    | Hypothetical protein                                                                                                                     |
| NA | HMPRNC0000_2711 | .            |    |    |  | 1  | Na+/H+ antiporter                                                                                                                        |
| NA | HMPRNC0000_2714 | .            | 1  |    |  |    | Hypothetical protein                                                                                                                     |
| NA | HMPRNC0000_2715 | .            | 1  |    |  |    | Uncharacterized ncRNA                                                                                                                    |
| NA | HMPRNC0000_2717 | .            | 1  |    |  | 1  | MFS-type transporter                                                                                                                     |
| NA | HMPRNC0000_2722 | <i>proV</i>  |    |    |  | 1  | Choline ABC transport system, ATP-binding protein OpuBA                                                                                  |
| NA | HMPRNC0000_2724 | .            | 1  | 1  |  | 1  | Amino acid-proton symporter YbeC                                                                                                         |
| NA | HMPRNC0000_2725 | <i>pnbA</i>  | -1 | -1 |  | -1 | Carboxylesterase, type B                                                                                                                 |
| NA | HMPRNC0000_2756 | .            |    |    |  | -1 | hypothetical protein                                                                                                                     |
| NA | HMPRNC0000_2759 | <i>pgm</i>   | -1 |    |  | -1 | Phosphoglucosamine mutase / Phosphomannomutase                                                                                           |
| NA | HMPRNC0000_2765 | <i>sasG</i>  |    |    |  | -1 | 1 Virulence-associated cell-wall-anchored protein SasG                                                                                   |
| NA | HMPRNC0000_2769 | <i>fnbB</i>  | 1  |    |  | 1  | Fibronectin binding protein FnbB                                                                                                         |
| NA | HMPRNC0000_2770 | <i>fnbA</i>  | 1  | 1  |  | 1  | Fibronectin binding protein FnbA                                                                                                         |
| NA | HMPRNC0000_2774 | .            |    |    |  | -1 | Transcriptional regulator, MerR family                                                                                                   |
| NA | HMPRNC0000_2776 | .            |    |    |  | -1 | hypothetical protein                                                                                                                     |
| NA | HMPRNC0000_2786 | .            | -1 |    |  |    | Efflux ABC transporter, ATP-binding protein                                                                                              |
| NA | HMPRNC0000_2787 | .            | -1 |    |  | -1 | Putative membrane-spanning protein                                                                                                       |
| NA | HMPRNC0000_2791 | .            | 1  |    |  | 1  | Phospholipase/carboxylesterase                                                                                                           |
| NA | HMPRNC0000_2792 | .            | 1  |    |  | 1  | Glyoxalase family protein                                                                                                                |
| NA | HMPRNC0000_2793 | .            | 1  |    |  | 1  | Transcriptional regulator, MarR family                                                                                                   |
| NA | HMPRNC0000_2795 | .            | 1  |    |  | 1  | Glyoxalase family protein                                                                                                                |
| NA | HMPRNC0000_2804 | <i>srtA</i>  | 1  |    |  |    | LPXTG specific sortase A                                                                                                                 |
| NA | HMPRNC0000_2814 | .            | 1  |    |  | 1  | Thioredoxin                                                                                                                              |
| NA | HMPRNC0000_2815 | .            | 1  |    |  | 1  | Hypothetical protein                                                                                                                     |
| NA | HMPRNC0000_2824 | <i>mvaS</i>  |    |    |  | -1 | Hydroxymethylglutaryl-CoA synthase                                                                                                       |
| NA | HMPRNC0000_2828 | <i>clpL</i>  |    |    |  | -1 | ClpE family protein                                                                                                                      |
| NA | HMPRNC0000_2834 | <i>rocA</i>  | -1 |    |  | -1 | Delta-1-pyrroline-5-carboxylate dehydrogenase                                                                                            |
| NA | HMPRNC0000_2839 | <i>copZ</i>  | 1  |    |  |    | Copper(I) chaperone CopZ                                                                                                                 |
| NA | HMPRNC0000_2842 | <i>crtN</i>  | -1 |    |  |    | -1 Dehydroisqualene desaturase                                                                                                           |
| NA | HMPRNC0000_2843 | <i>crtM</i>  |    |    |  | -1 | -1 Dehydroisqualene synthase                                                                                                             |
| NA | HMPRNC0000_2844 | .            | -1 | -1 |  | -1 | 4,4'-diaponeurosporenoate glycosyltransferase                                                                                            |
| NA | HMPRNC0000_2846 | <i>crtI</i>  | -1 |    |  |    | Diapycopene oxygenase                                                                                                                    |
| NA | HMPRNC0000_2849 | .            |    |    |  | -1 | Acyltransferase                                                                                                                          |
| NA | HMPRNC0000_2852 | <i>isaA</i>  |    |    |  | -1 | Immunodominant antigen A precursor                                                                                                       |
| NA | HMPRNC0000_2856 | .            | 1  | 1  |  | 1  | Hypothetical protein                                                                                                                     |
| NA | HMPRNC0000_2857 | .            | 1  | 1  |  | 1  | 1 Hypothetical protein                                                                                                                   |
| NA | HMPRNC0000_2865 | .            |    |    |  | -1 | -1 Putative hydrolase/acyltransferase                                                                                                    |

|    |                 |             |  |    |    |    |    |                                                                                               |
|----|-----------------|-------------|--|----|----|----|----|-----------------------------------------------------------------------------------------------|
| NA | HMPRNC0000_2891 | .           |  | 1  | 1  | -1 | -1 | Amino acid permease, GabP family                                                              |
| NA | HMPRNC0000_2898 | .           |  | -1 |    | -1 |    | hypothetical protein                                                                          |
| NA | HMPRNC0000_2918 | .           |  | -1 |    |    |    | ABC transporter sensor linked response regulator                                              |
| NA | HMPRNC0000_2924 | .           |  |    |    | -1 |    | Cardiolipin synthetase                                                                        |
| NA | HMPRNC0000_2926 | <i>clfB</i> |  | -1 | -1 | -1 | -1 | Clumping factor ClfB, fibrinogen binding protein                                              |
| NA | HMPRNC0000_2942 | <i>manA</i> |  |    |    | -1 |    | PTS system, mannose-specific IIB/IIC/IIA component                                            |
| NA | HMPRNC0000_2949 | <i>sraP</i> |  |    | 1  |    |    | Putative cell-wall-anchored protein SasF (LPXAG motif)                                        |
| NA | HMPRNC0000_2966 | .           |  | -1 |    | -1 |    | hypothetical protein                                                                          |
| NA | HMPRNC0000_2986 | <i>hisB</i> |  |    | 1  |    |    | Imidazoleglycerol-phosphate dehydratase                                                       |
| NA | HMPRNC0000_2987 | <i>hisC</i> |  | 1  | 1  |    |    | Histidinol-phosphate aminotransferase                                                         |
| NA | HMPRNC0000_2990 | <i>hisG</i> |  | 1  | 1  |    |    | ATP phosphoribosyltransferase -> HisGs                                                        |
| NA | HMPRNC0000_2991 | <i>hisZ</i> |  | 1  | 1  |    |    | ATP phosphoribosyltransferase regulatory subunit                                              |
| NA | HMPRNC0000_2996 | .           |  |    | 1  |    |    | Duplicated ATPase component MtsB of energizing module of methionine-regulated ECF transporter |
| NA | HMPRNC0000_2999 | .           |  |    | 1  |    |    | Hypothetical protein                                                                          |
| NA | HMPRNC0000_3011 | .           |  |    |    |    | 1  | Hypothetical protein                                                                          |
| NA | HMPRNC0000_3019 | <i>cspB</i> |  |    |    |    | -1 | Cold shock protein of CSP family                                                              |
| NA | HMPRNC0000_3025 | .           |  | 1  | 1  |    | 1  | Chromosome (plasmid) partitioning protein ParB-2                                              |
