# Supplementary material for: The Effect of Three Complexes of Iodine with Amino Acids on Gene Expression of Model Antibiotic Resistant Microorganisms Escherichia coli ATCC BAA-196 and Staphylococcus aureus ATCC BAA-39
Source: MDPI journal article supplement (doi:10.3390/microorganisms11071705), 2023-06-29
Supplement: s1 [file s1]

**Table S1. X-ray diffraction and refinement parameters**

| <b>Crystal Data</b>                         |                                                                                                                                 |                                                                                        |                                                                                                                               |
|---------------------------------------------|---------------------------------------------------------------------------------------------------------------------------------|----------------------------------------------------------------------------------------|-------------------------------------------------------------------------------------------------------------------------------|
| <b>Compound</b>                             | <b>KS25</b>                                                                                                                     | <b>KS33</b>                                                                            | <b>KS51</b>                                                                                                                   |
| Formula                                     | 2C <sub>3</sub> H <sub>7</sub> NO <sub>2</sub> · HI <sub>3</sub>                                                                | 3C <sub>2</sub> H <sub>5</sub> NO <sub>2</sub> · LiI                                   | 4C <sub>6</sub> H <sub>13</sub> NO <sub>2</sub> · 2HI · H <sub>2</sub> O                                                      |
| Molecular Weight                            | 559.91                                                                                                                          | 359.05                                                                                 | 798.54                                                                                                                        |
| Crystal System; Space group                 | Monoclinic, P2 <sub>1</sub> /c                                                                                                  | Monoclinic, P2 <sub>1</sub>                                                            | Monoclinic, C2                                                                                                                |
| Lattice constants: a, b, c [Å]              | 8.1057(16);<br>8.9853(18);<br>10.541(2)                                                                                         | 5.4692(11); 9.898(2);<br>11.193(2)                                                     | 22.8411(7);<br>5.8290(2);<br>16.2238(5)                                                                                       |
| alpha, beta, gamma [deg]                    | 90; 100.29(3); 90                                                                                                               | 90; 90,67(3); 90                                                                       | 90; 123.658(2); 90                                                                                                            |
| V, [Å <sup>3</sup> ]; Z                     | 755.4(3); 2                                                                                                                     | 605.9(2); 2                                                                            | 1797.94(12); 2                                                                                                                |
| D(calc)[g/cm <sup>3</sup> ]; F(000)         | 2.462; 512                                                                                                                      | 1.968; 352                                                                             | 1.475; 812                                                                                                                    |
| Mu(MoKα) [mm <sup>-1</sup> ]                | 6.205                                                                                                                           | 2.662                                                                                  | 1.796                                                                                                                         |
| Crystal Size [mm]                           | 0.10 x 0.10 x 0.20                                                                                                              | 0.14 x 0.17 x 0.20                                                                     | 0.02 x 0.10 x 0.20                                                                                                            |
| <b>Data Collection</b>                      |                                                                                                                                 |                                                                                        |                                                                                                                               |
| T [°K]; Radiation [Å]                       | 200; MoKα;<br>λ=0,71073                                                                                                         | 200; MoKα; λ=0,71073                                                                   | 100; MoKα;<br>λ=0.71073                                                                                                       |
| θ <sub>min</sub> ; θ <sub>max</sub> , [deg] | 2.6; 30.0                                                                                                                       | 1.8; 30.0                                                                              | 3.2; 29.7                                                                                                                     |
| Dataset                                     | 0:11; 0:12; -14:14                                                                                                              | 0:7 ; -13:13 ; -15:15                                                                  | -31:31; -8:8 ; -22:22                                                                                                         |
| Tot., Uniq. Data, R(int)                    | 2338, 2195, 0.023                                                                                                               | 4107, 3515, 0.022                                                                      | 9148, 4462, 0.029                                                                                                             |
| Observed data, I > 2,0 sigma(I)             | 1737                                                                                                                            | 3322                                                                                   | 3726                                                                                                                          |
| <b>Refinement</b>                           |                                                                                                                                 |                                                                                        |                                                                                                                               |
| Nref, Npa                                   | 2195; 102                                                                                                                       | 3515; 157                                                                              | 4462; 185                                                                                                                     |
| R, wR <sup>2</sup> , S                      | 0.0351; 0.0859;<br>1.10                                                                                                         | 0.0377; 0.0955; 1.25                                                                   | 0.0458; 0.0684; 1.05                                                                                                          |
|                                             | w =<br>1/[s <sup>2</sup> (Fo <sup>2</sup> )+(0.0374P) <sup>2</sup> +0.2440P], where<br>P=(Fo <sup>2</sup> +2Fc <sup>2</sup> )/3 | w =<br>1/[s <sup>2</sup> (Fo <sup>2</sup> )+(0.0374P) <sup>2</sup> +0.2440P],<br>where | w =<br>1/[s <sup>2</sup> (Fo <sup>2</sup> )+(0.0374P) <sup>2</sup> +0.2440P], где<br>P=(Fo <sup>2</sup> +2Fc <sup>2</sup> )/3 |

|                                                |             |                      |             |
|------------------------------------------------|-------------|----------------------|-------------|
|                                                |             | $P=(F_o^2+2F_c^2)/3$ |             |
| Max. and Av. Shift/Error                       | 0.00; 0.00  | 0.00; 0.00           | 0.00; 0.00  |
| Min. and Max. Resd. Dens. [ $e/\text{\AA}^3$ ] | -1.03; 1.45 | -1.56; 2.08          | -0.94; 0.88 |
